# Supplementary material
Source: PubMed Central journal article supplement (PMC4099047)
Supplement: NIHMS425275-supplement-1_si_001.pdf [file NIHMS425275-supplement-1_si_001.pdf]

**Supporting Information for**

**Synthesis of the 1-Monoester of 2-Ketoalkanedioic Acids, e.g., Octyl  $\alpha$ -Ketoglutarate**

*Michael E. Jung\* and Gang Deng*

Department of Chemistry and Biochemistry, University of California, Los Angeles, California 90095-  
1569

Table of Contents

Spectra .....S2

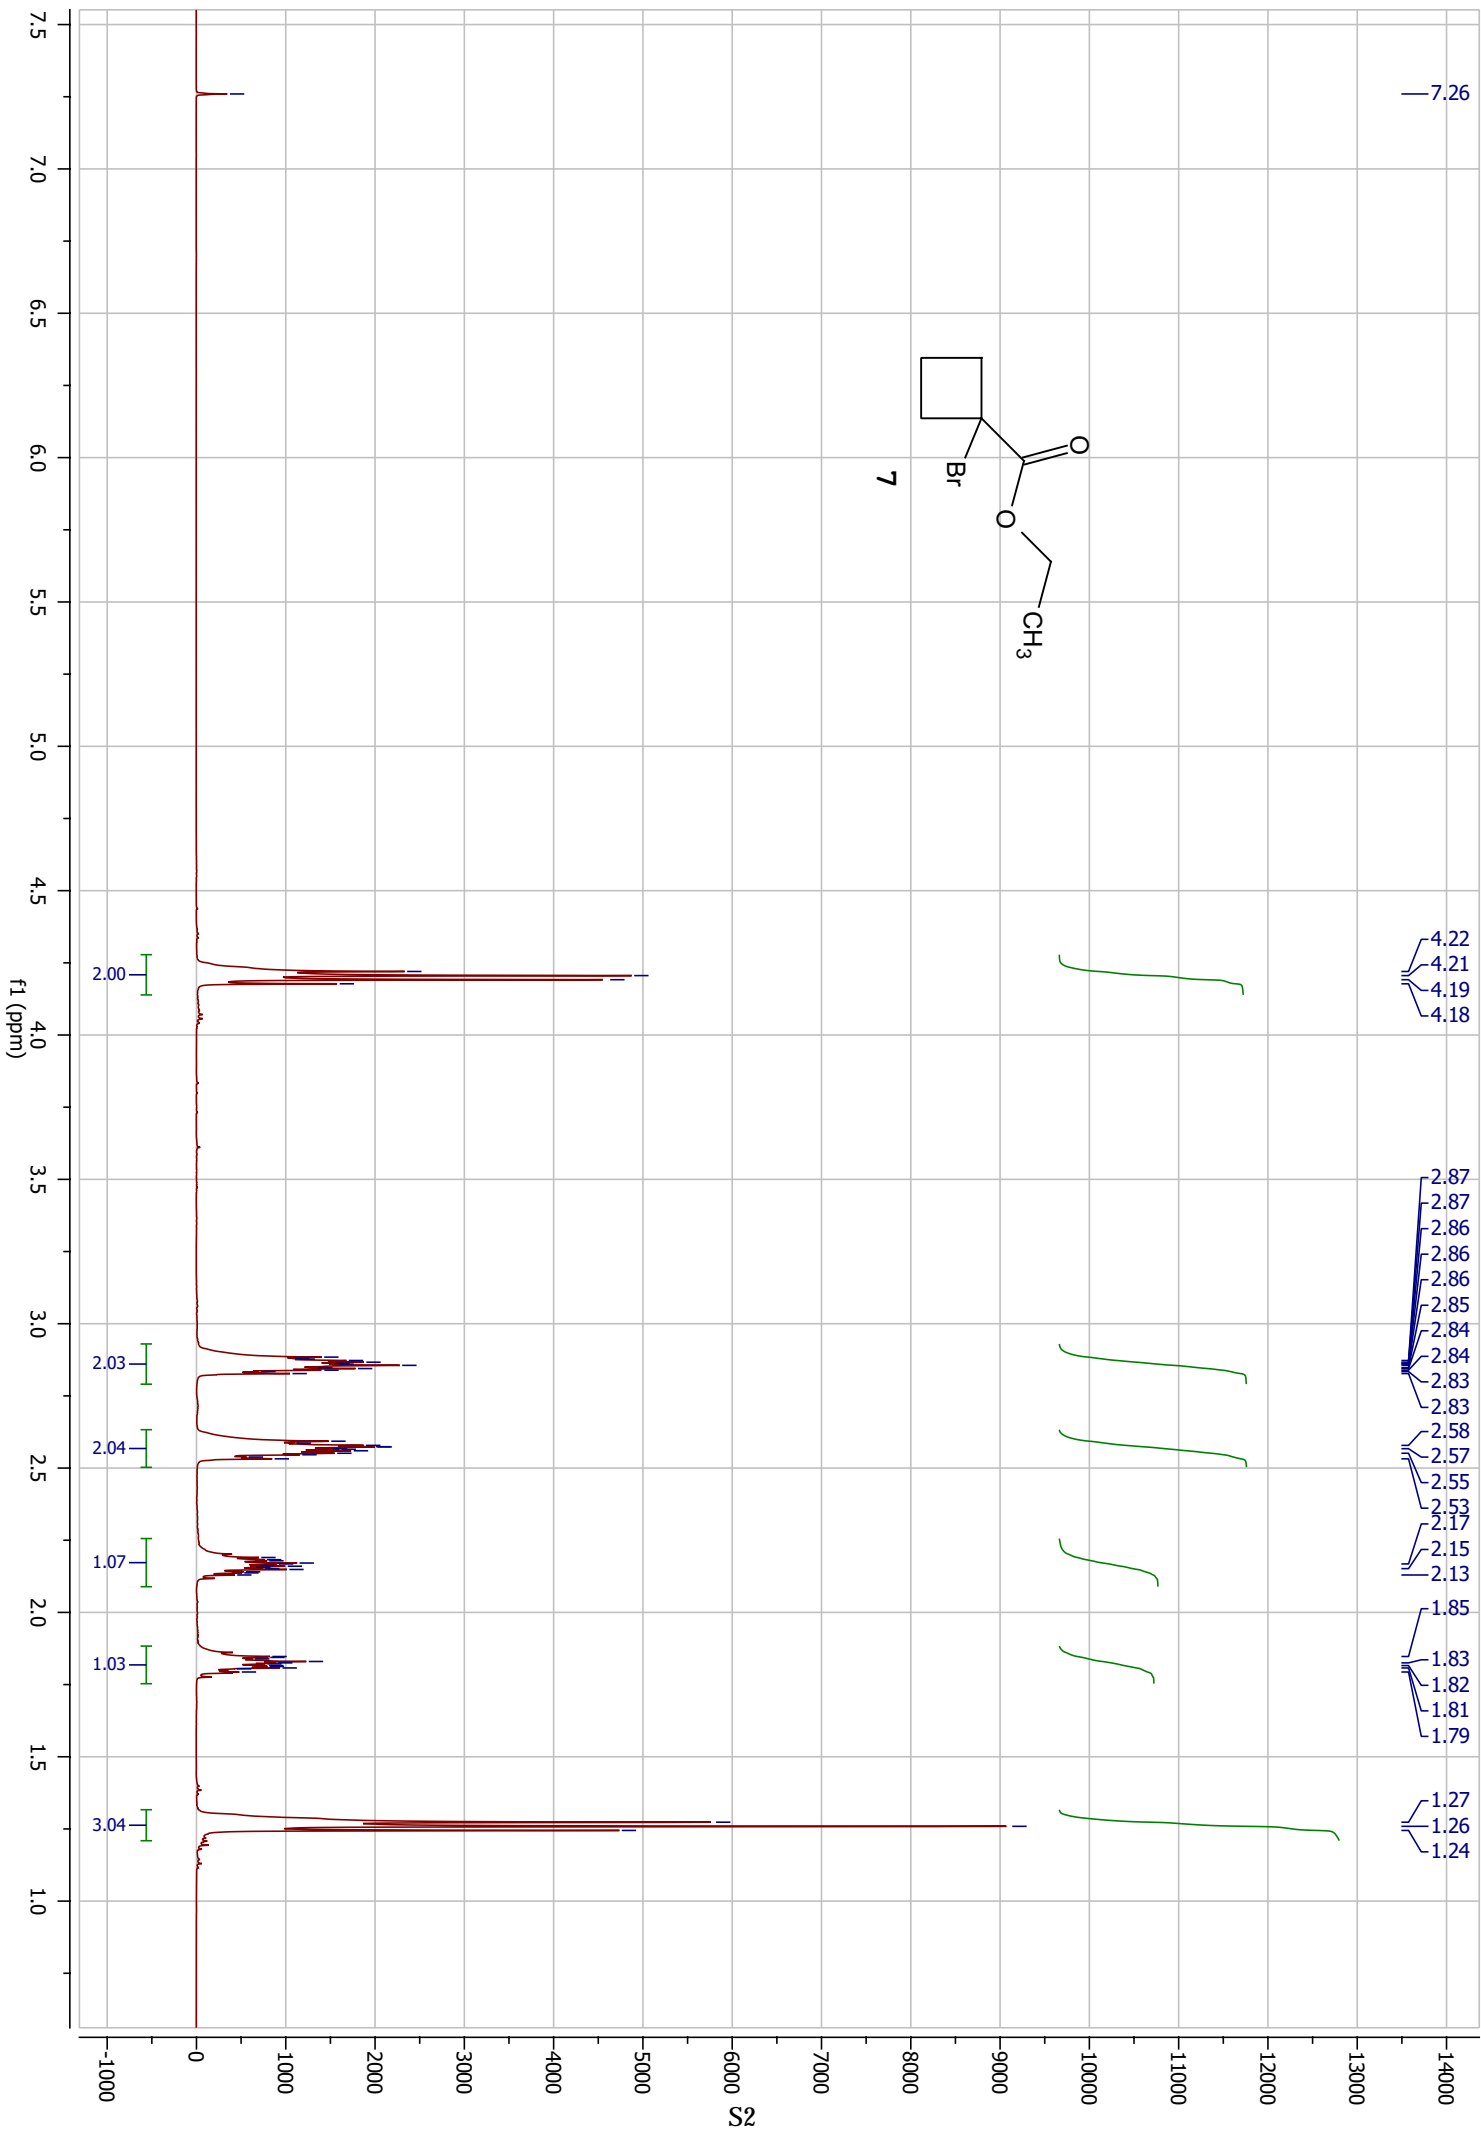

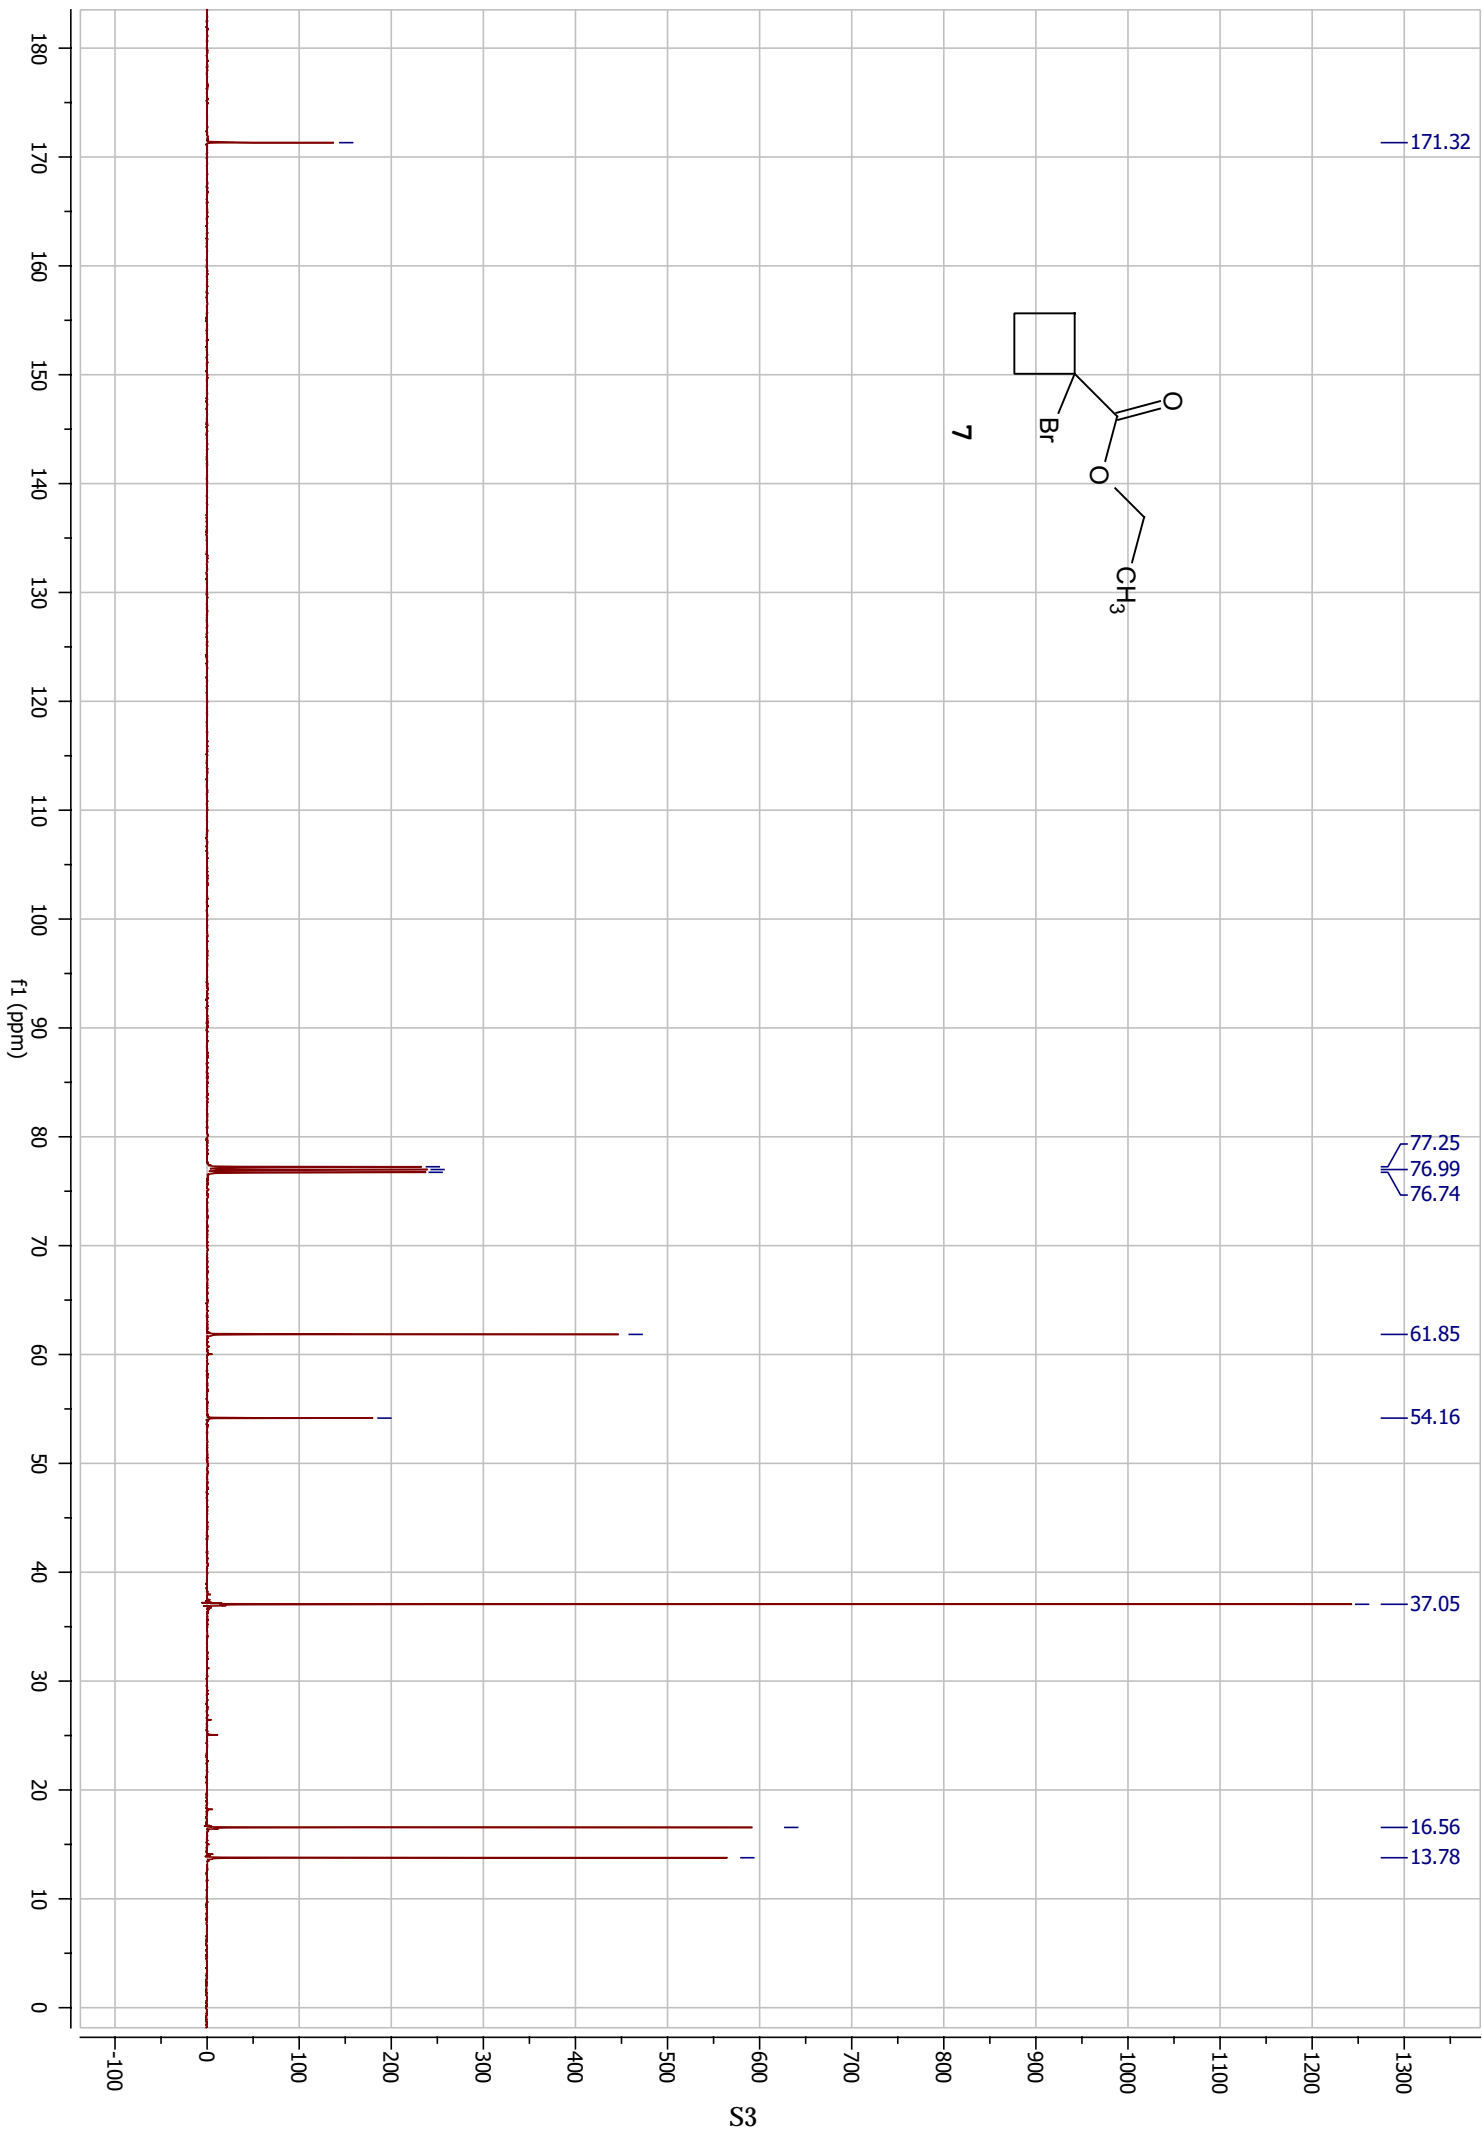

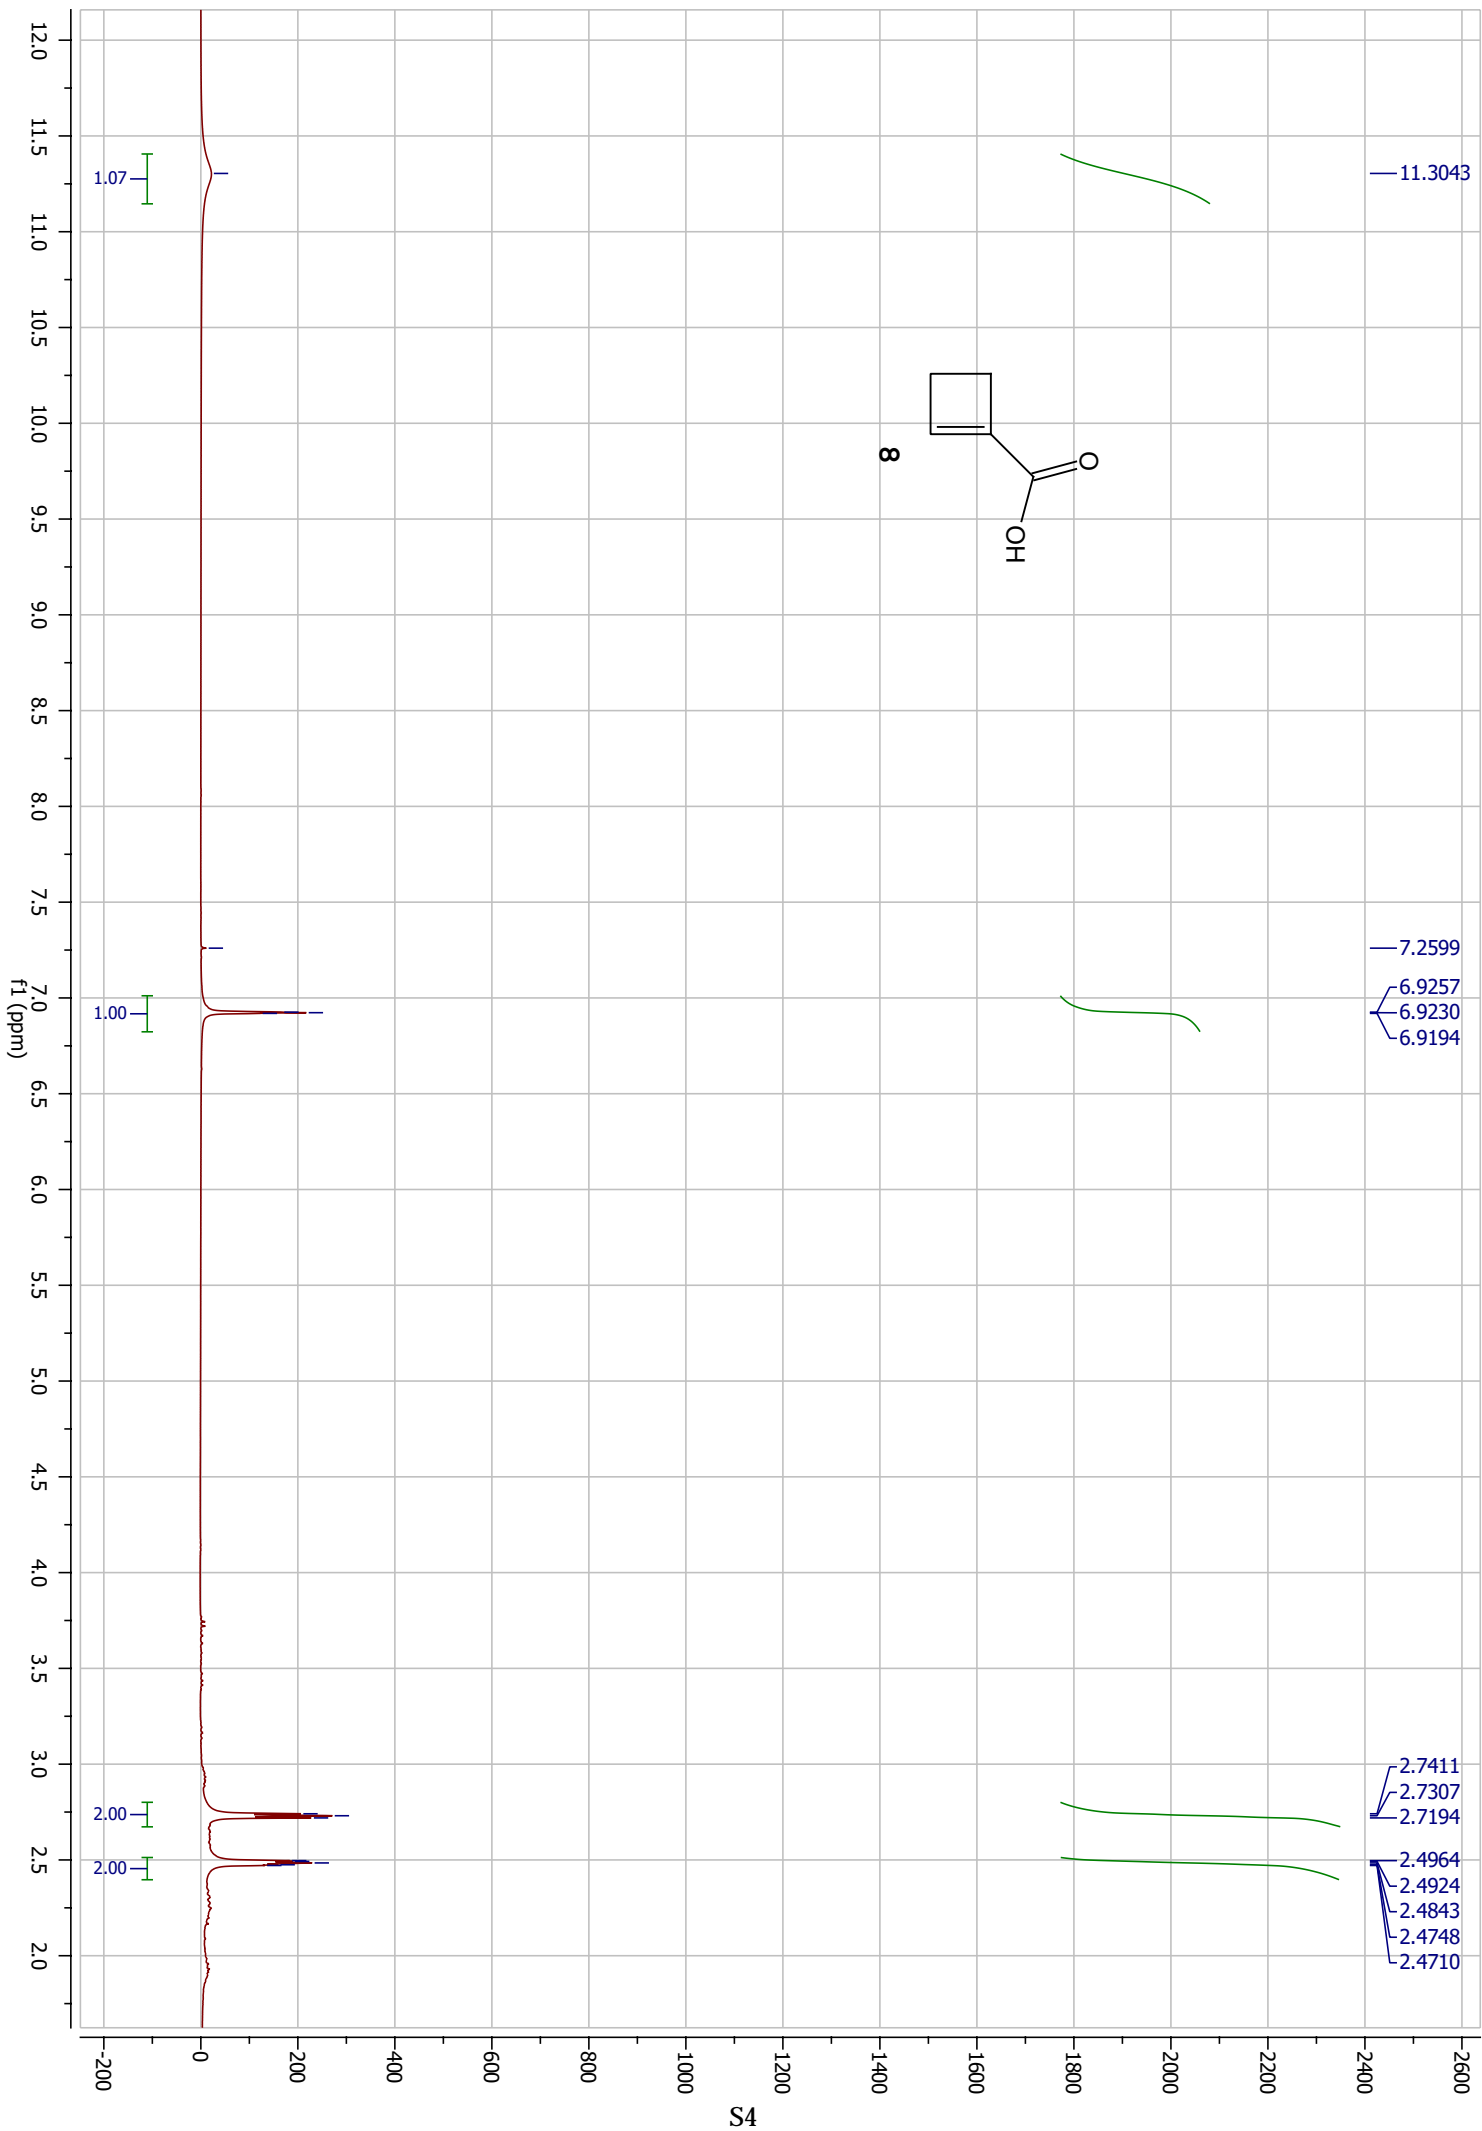

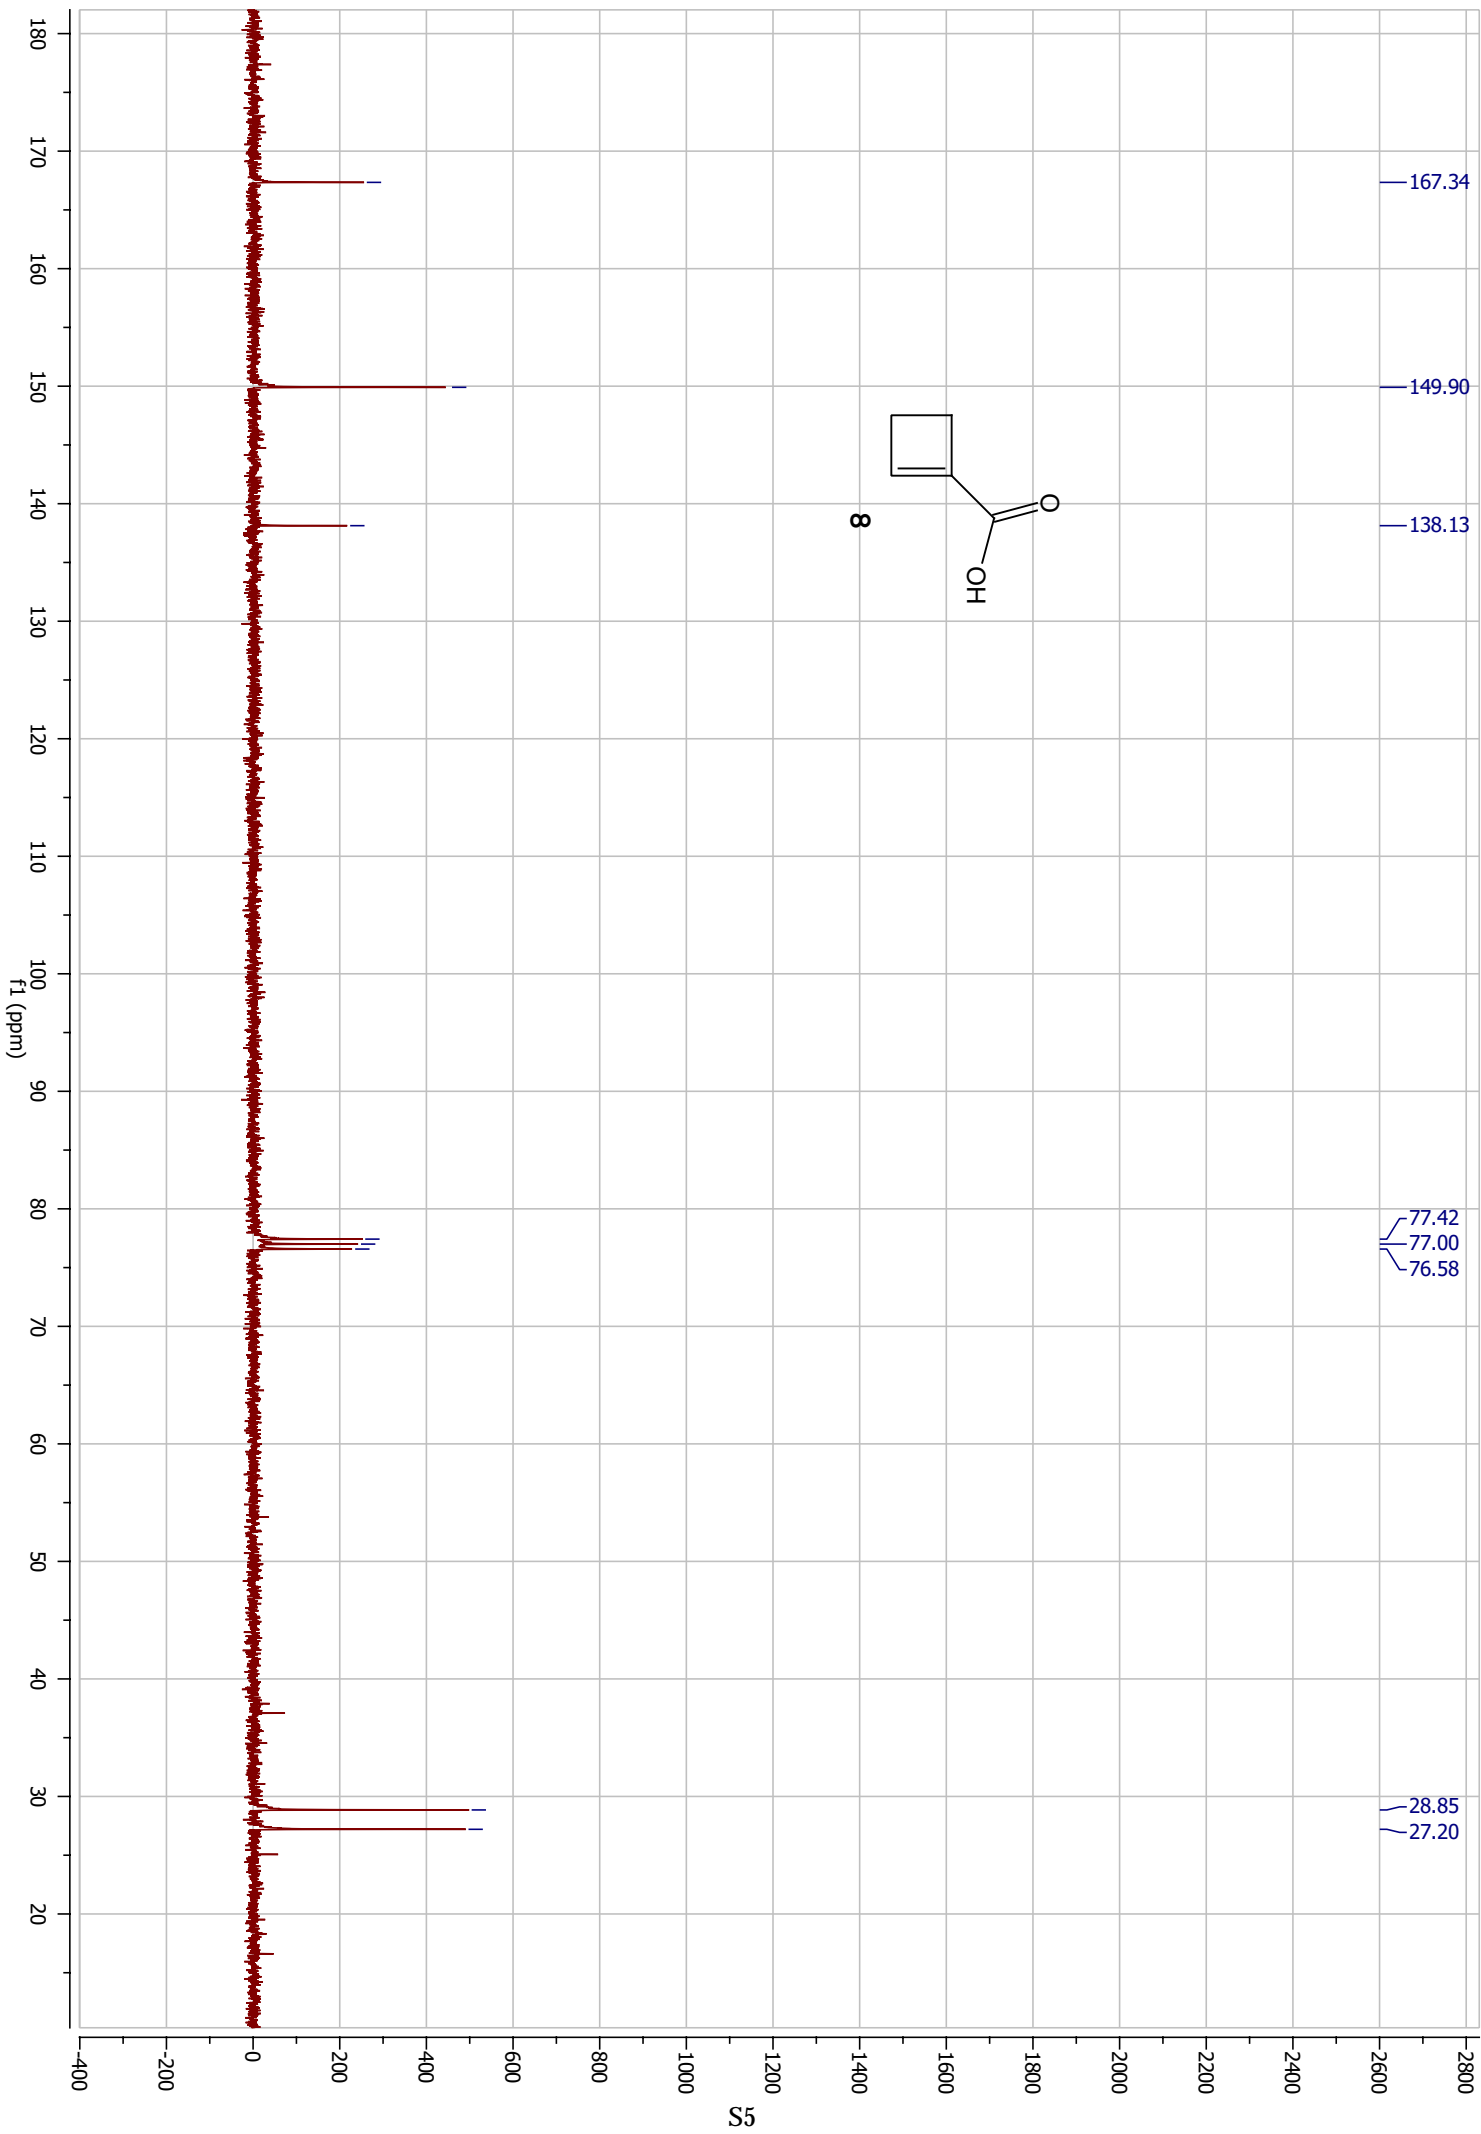

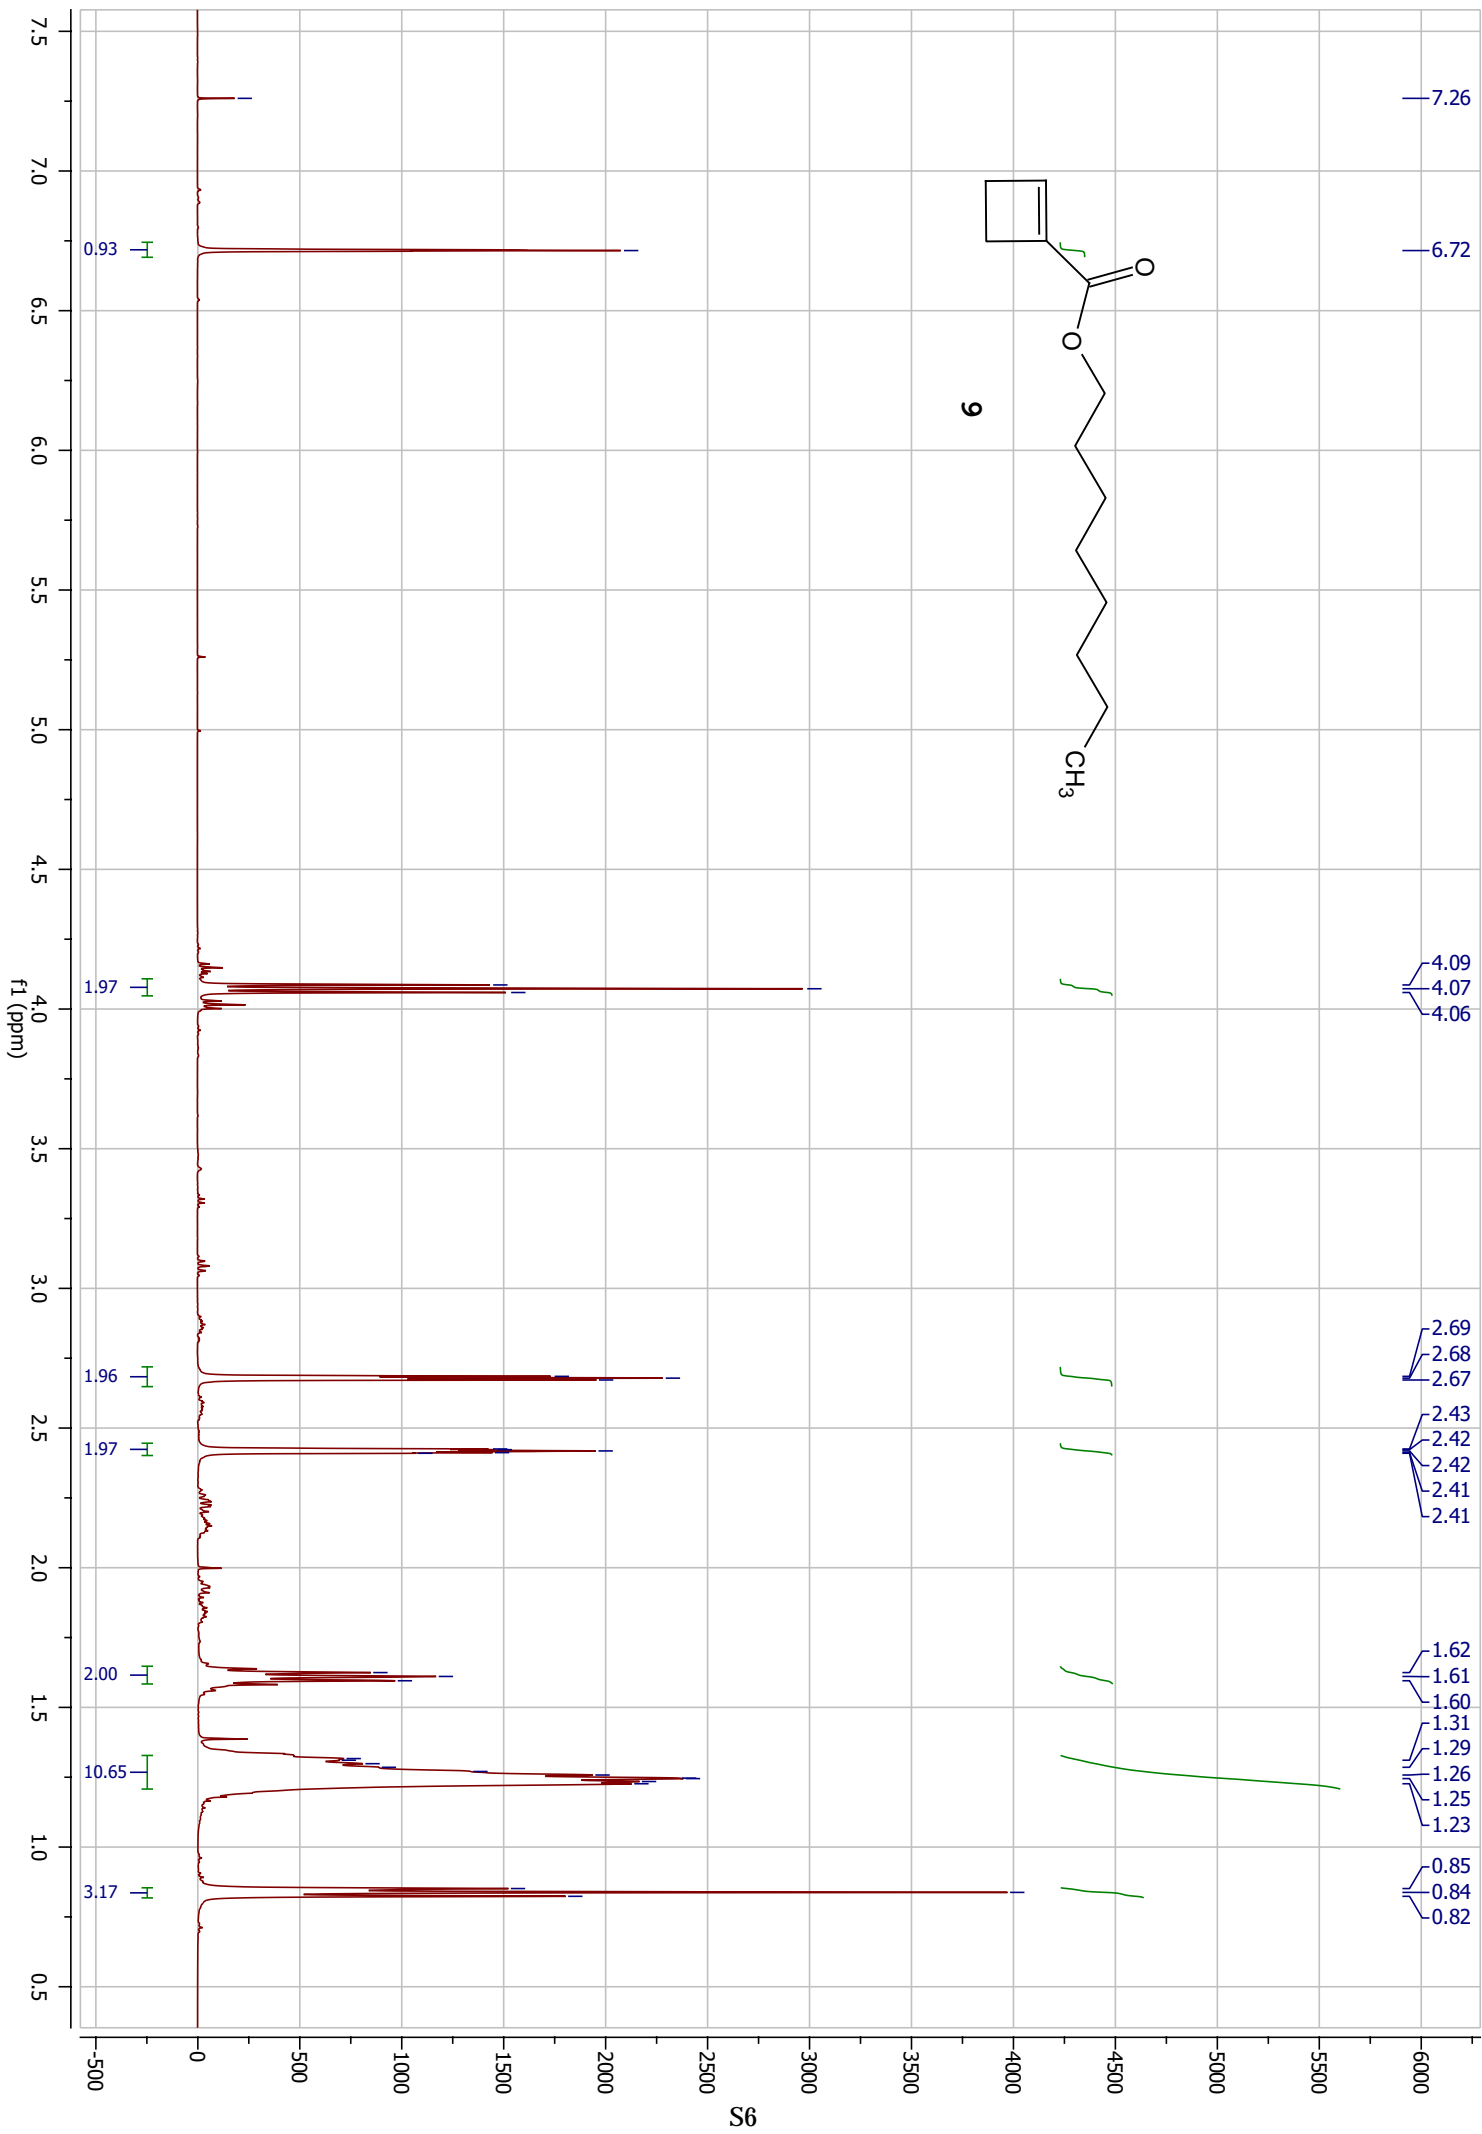

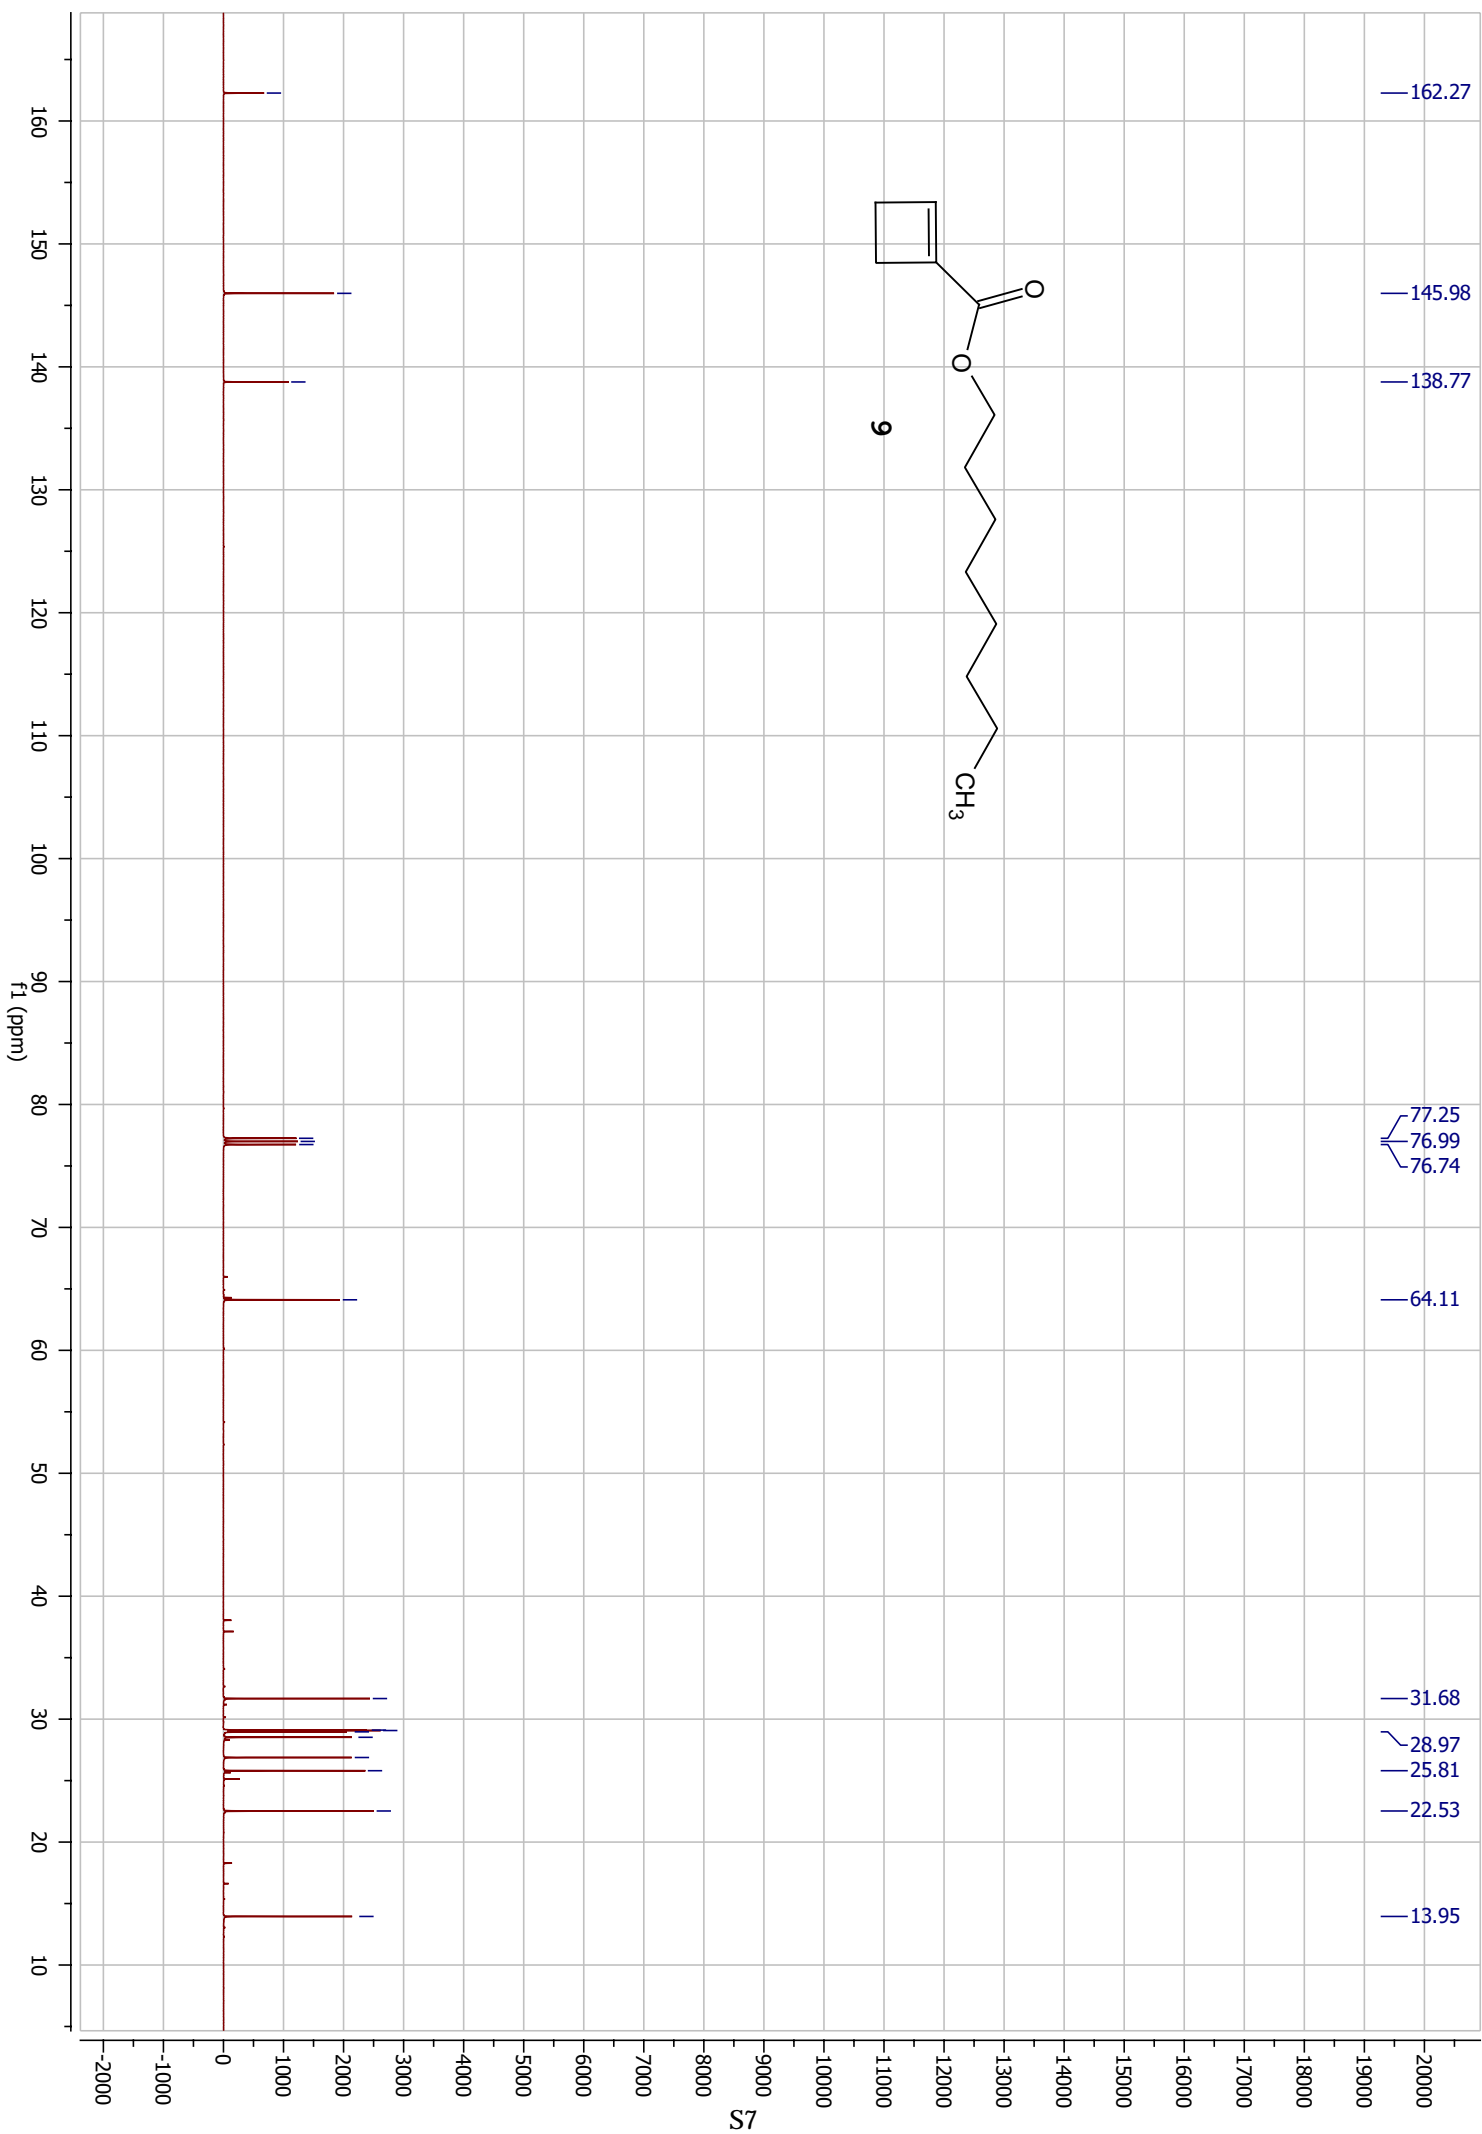

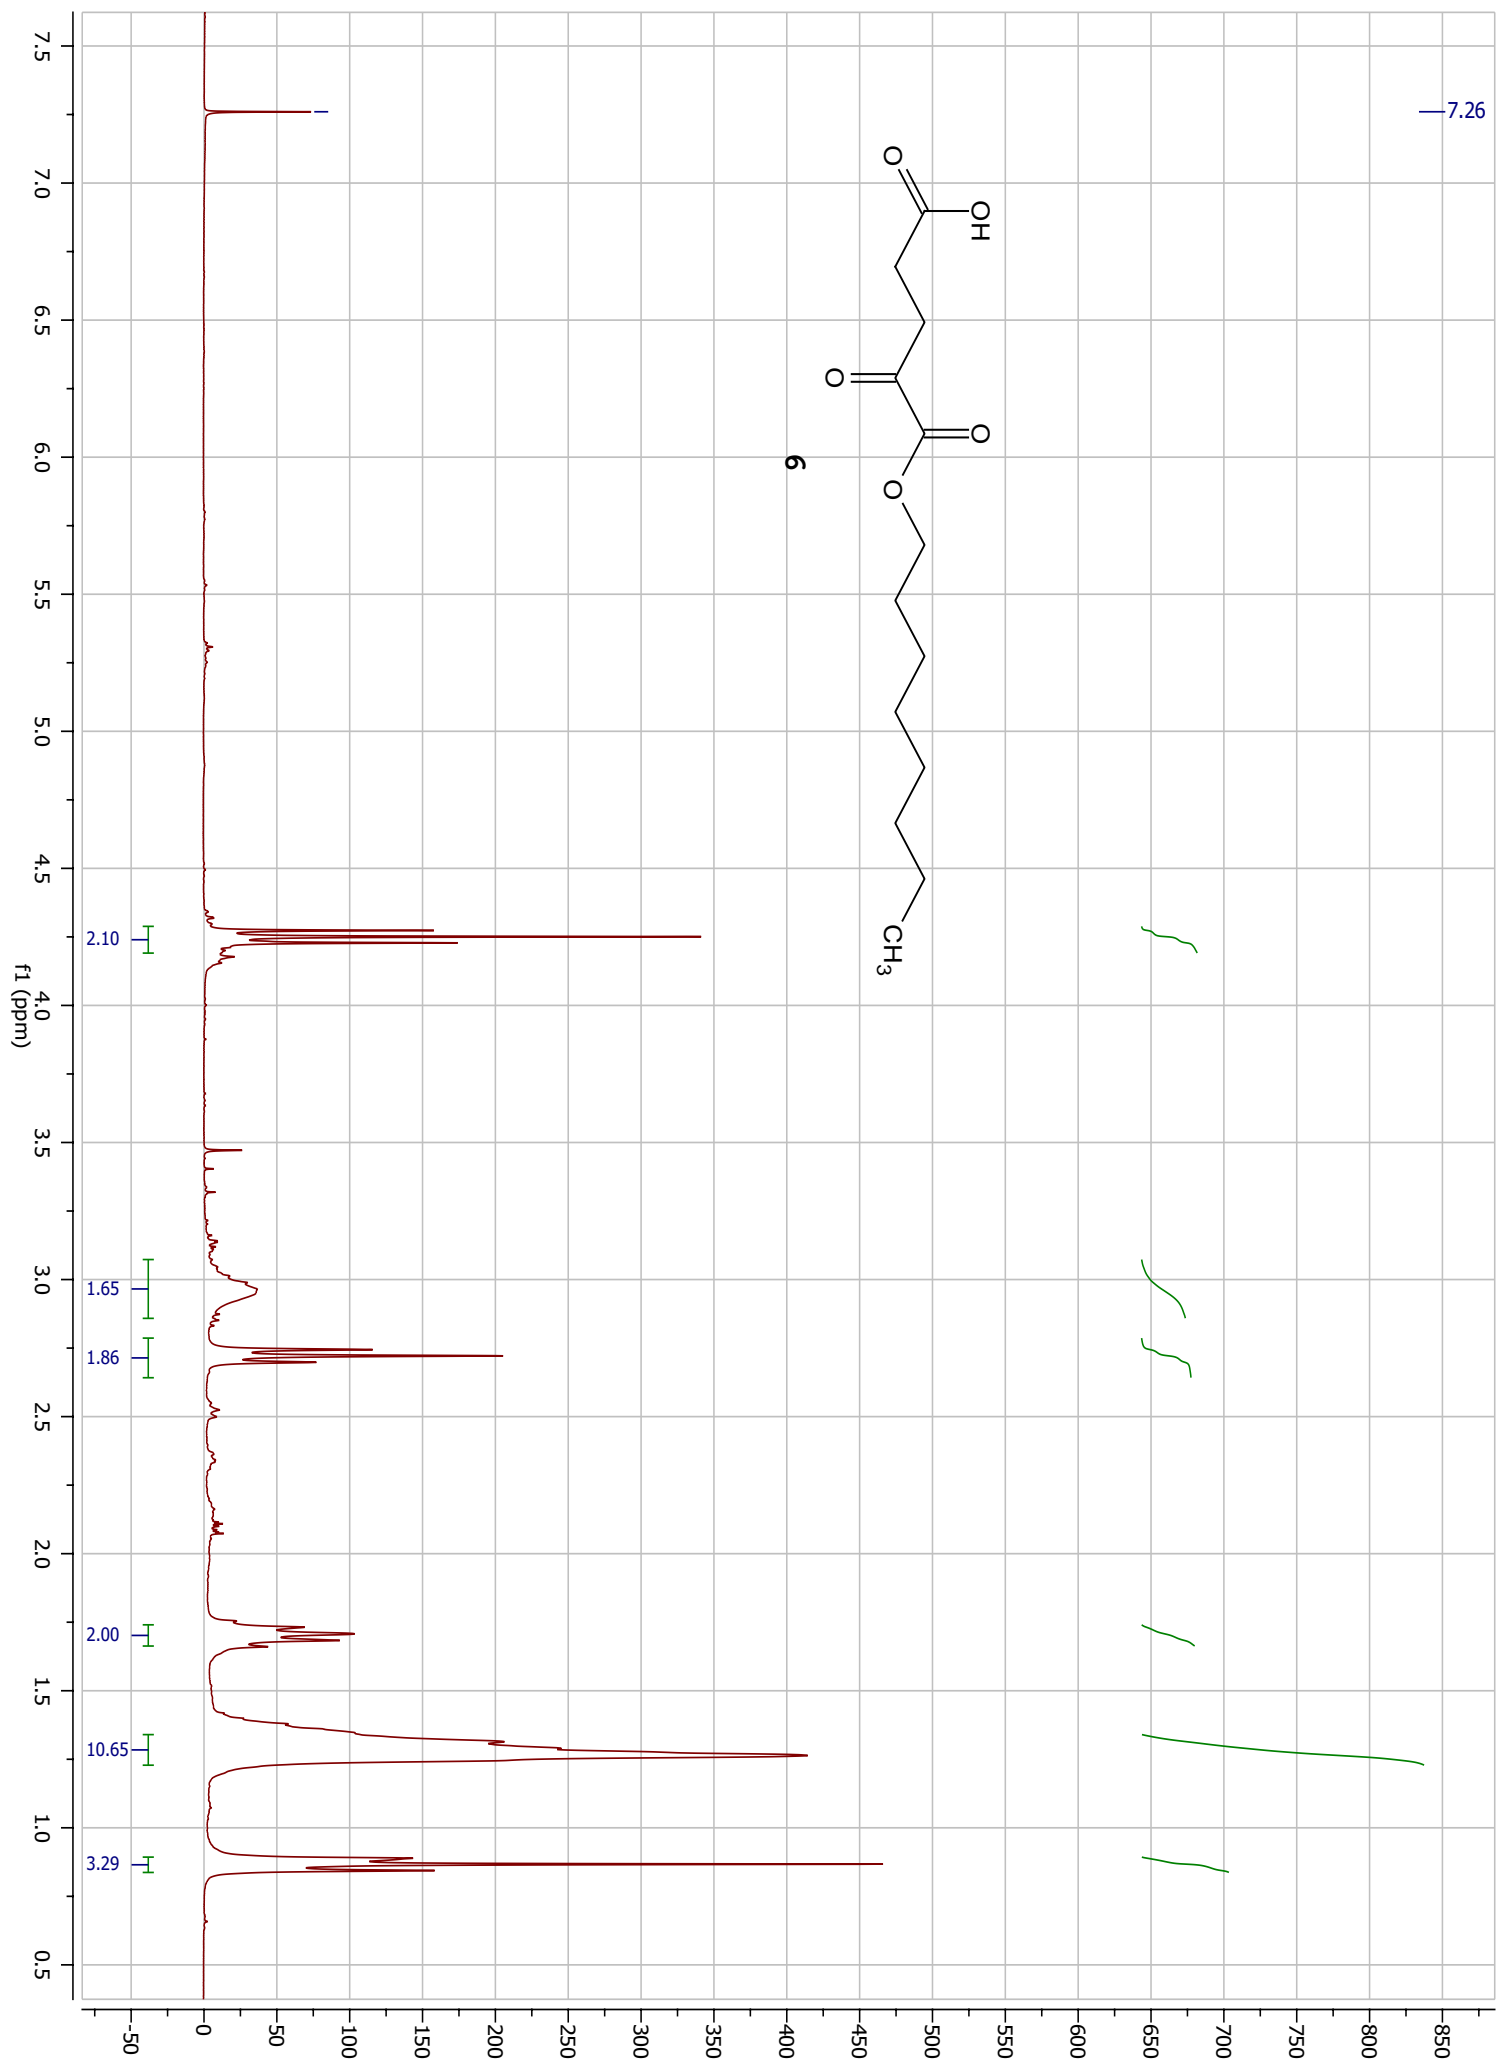



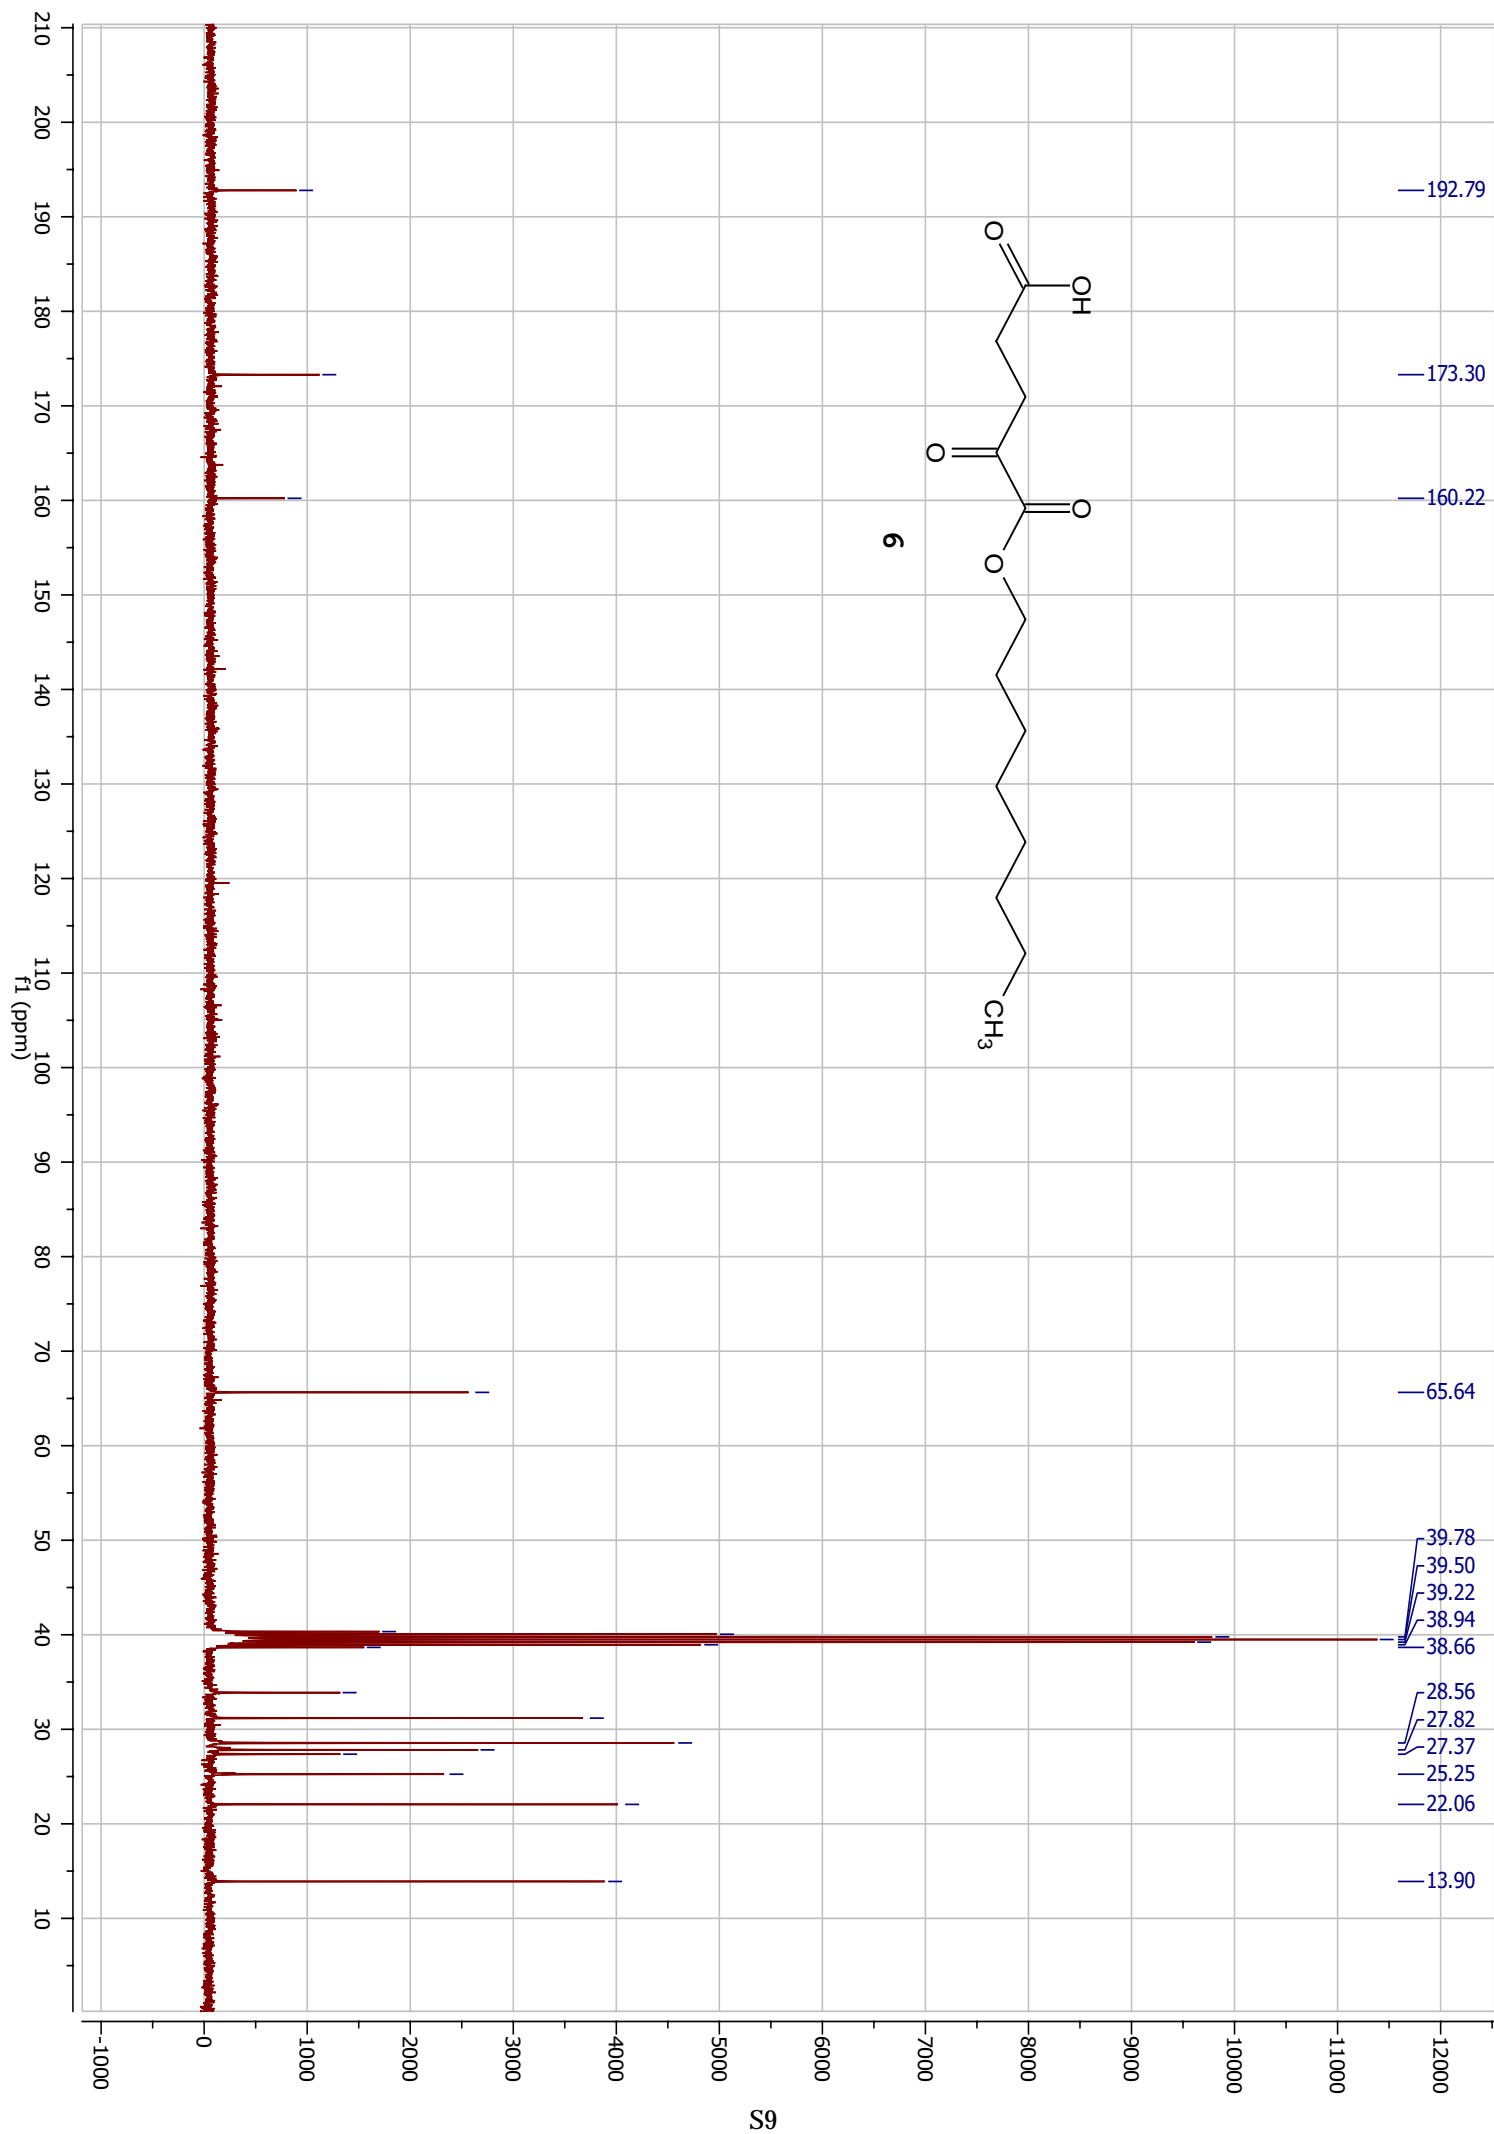

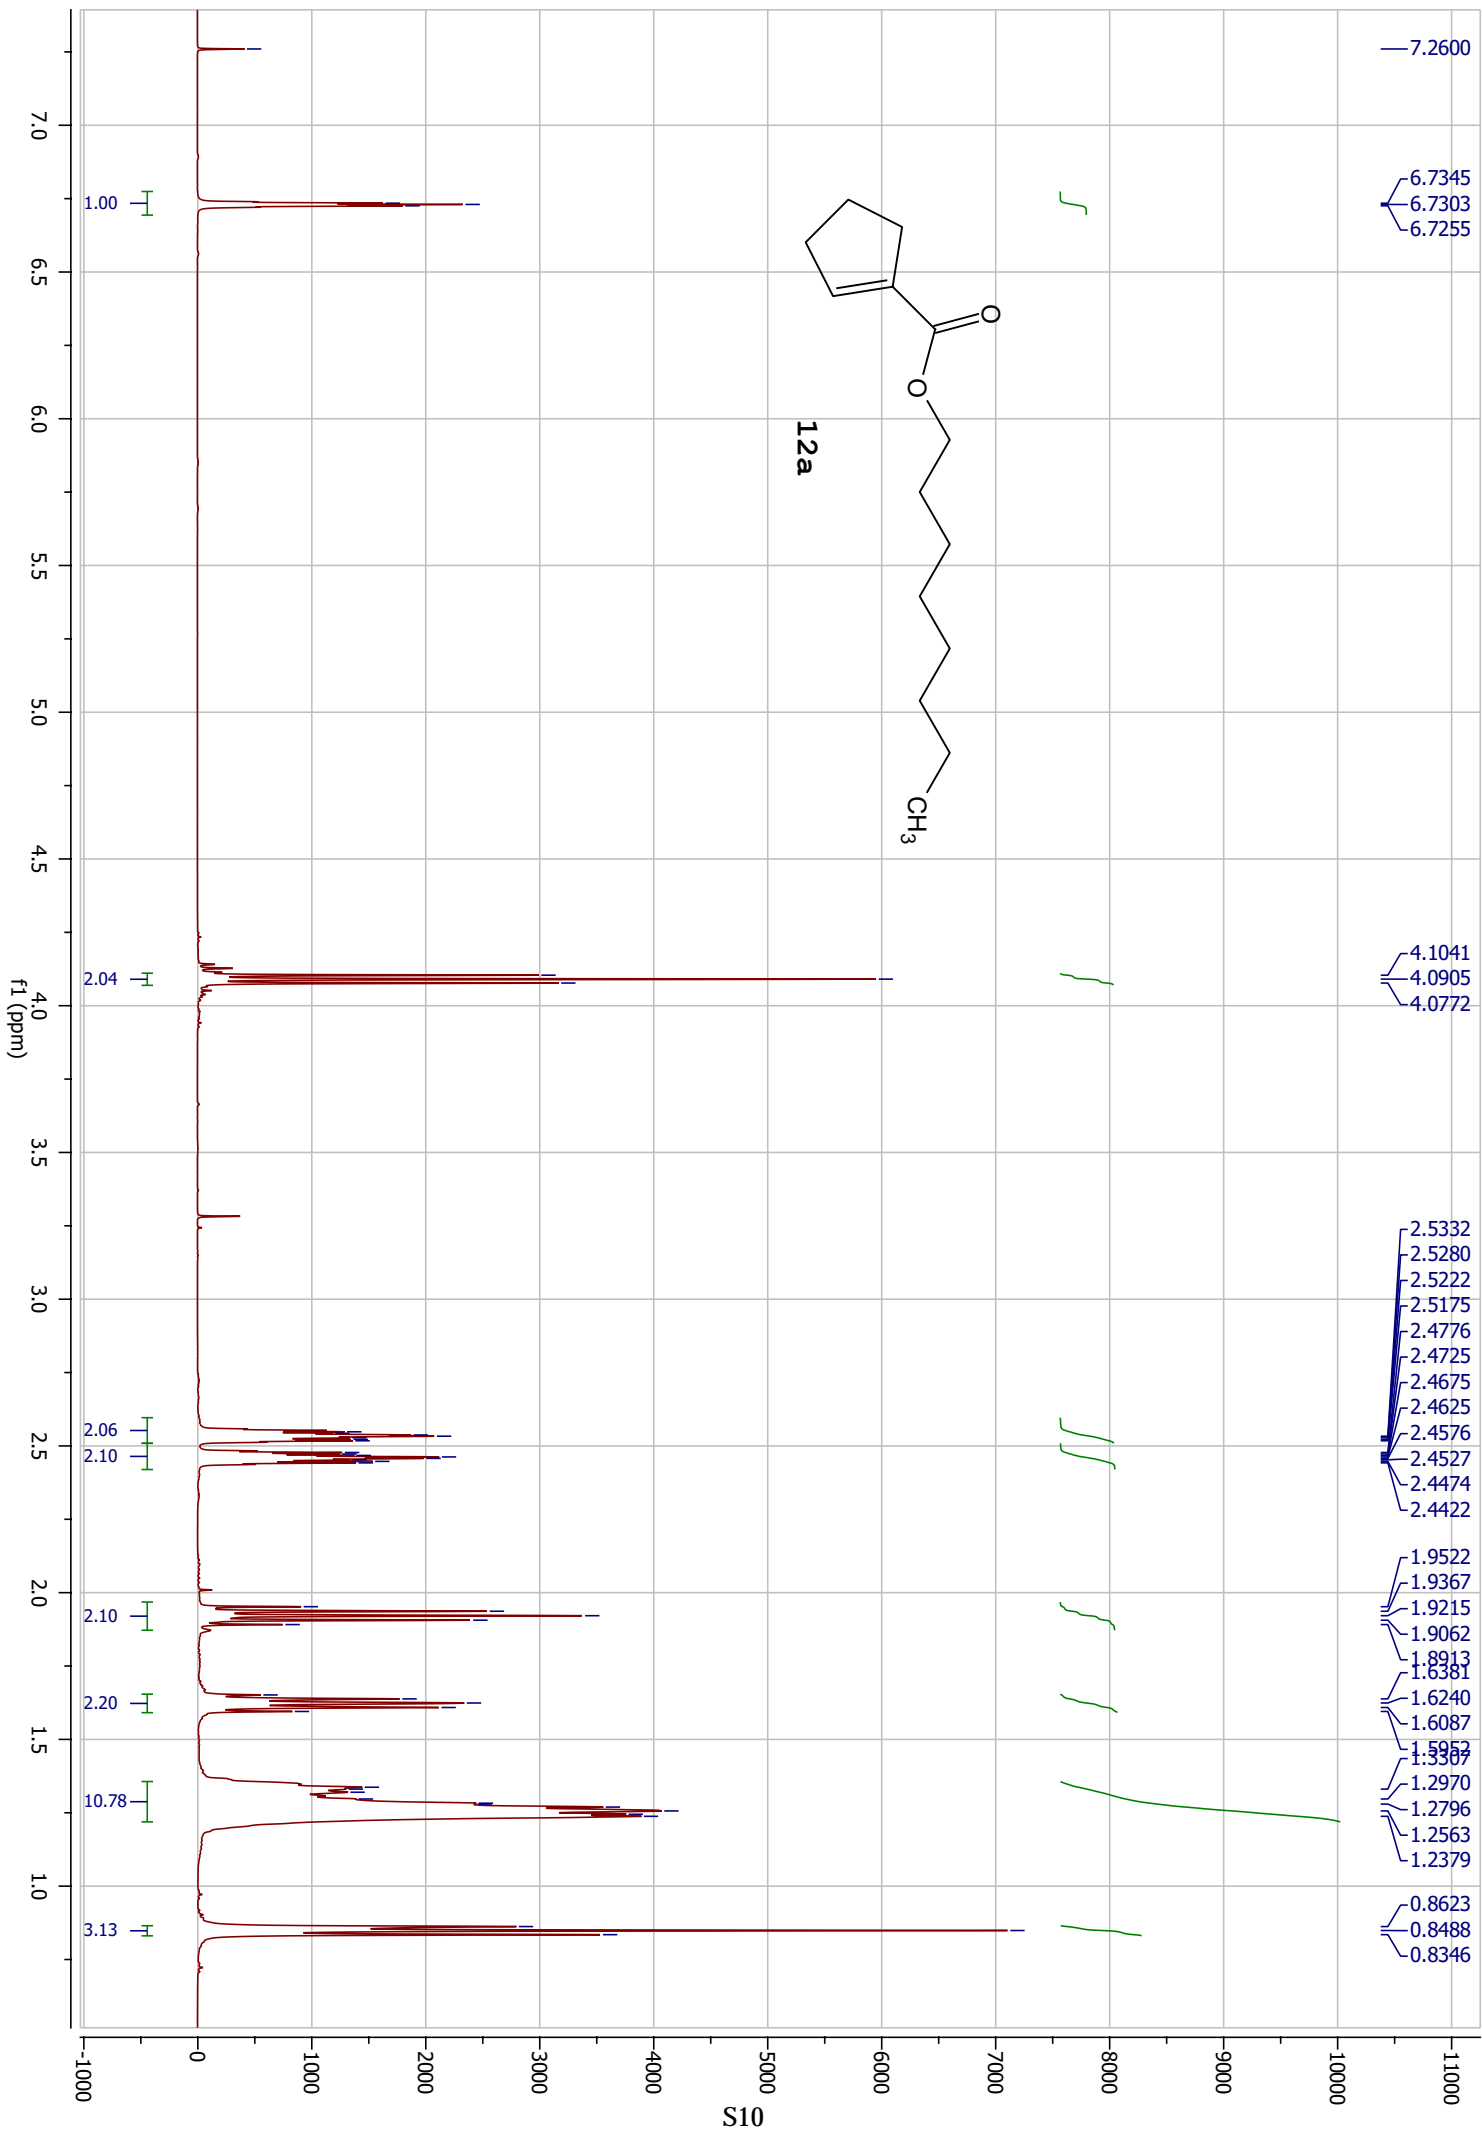

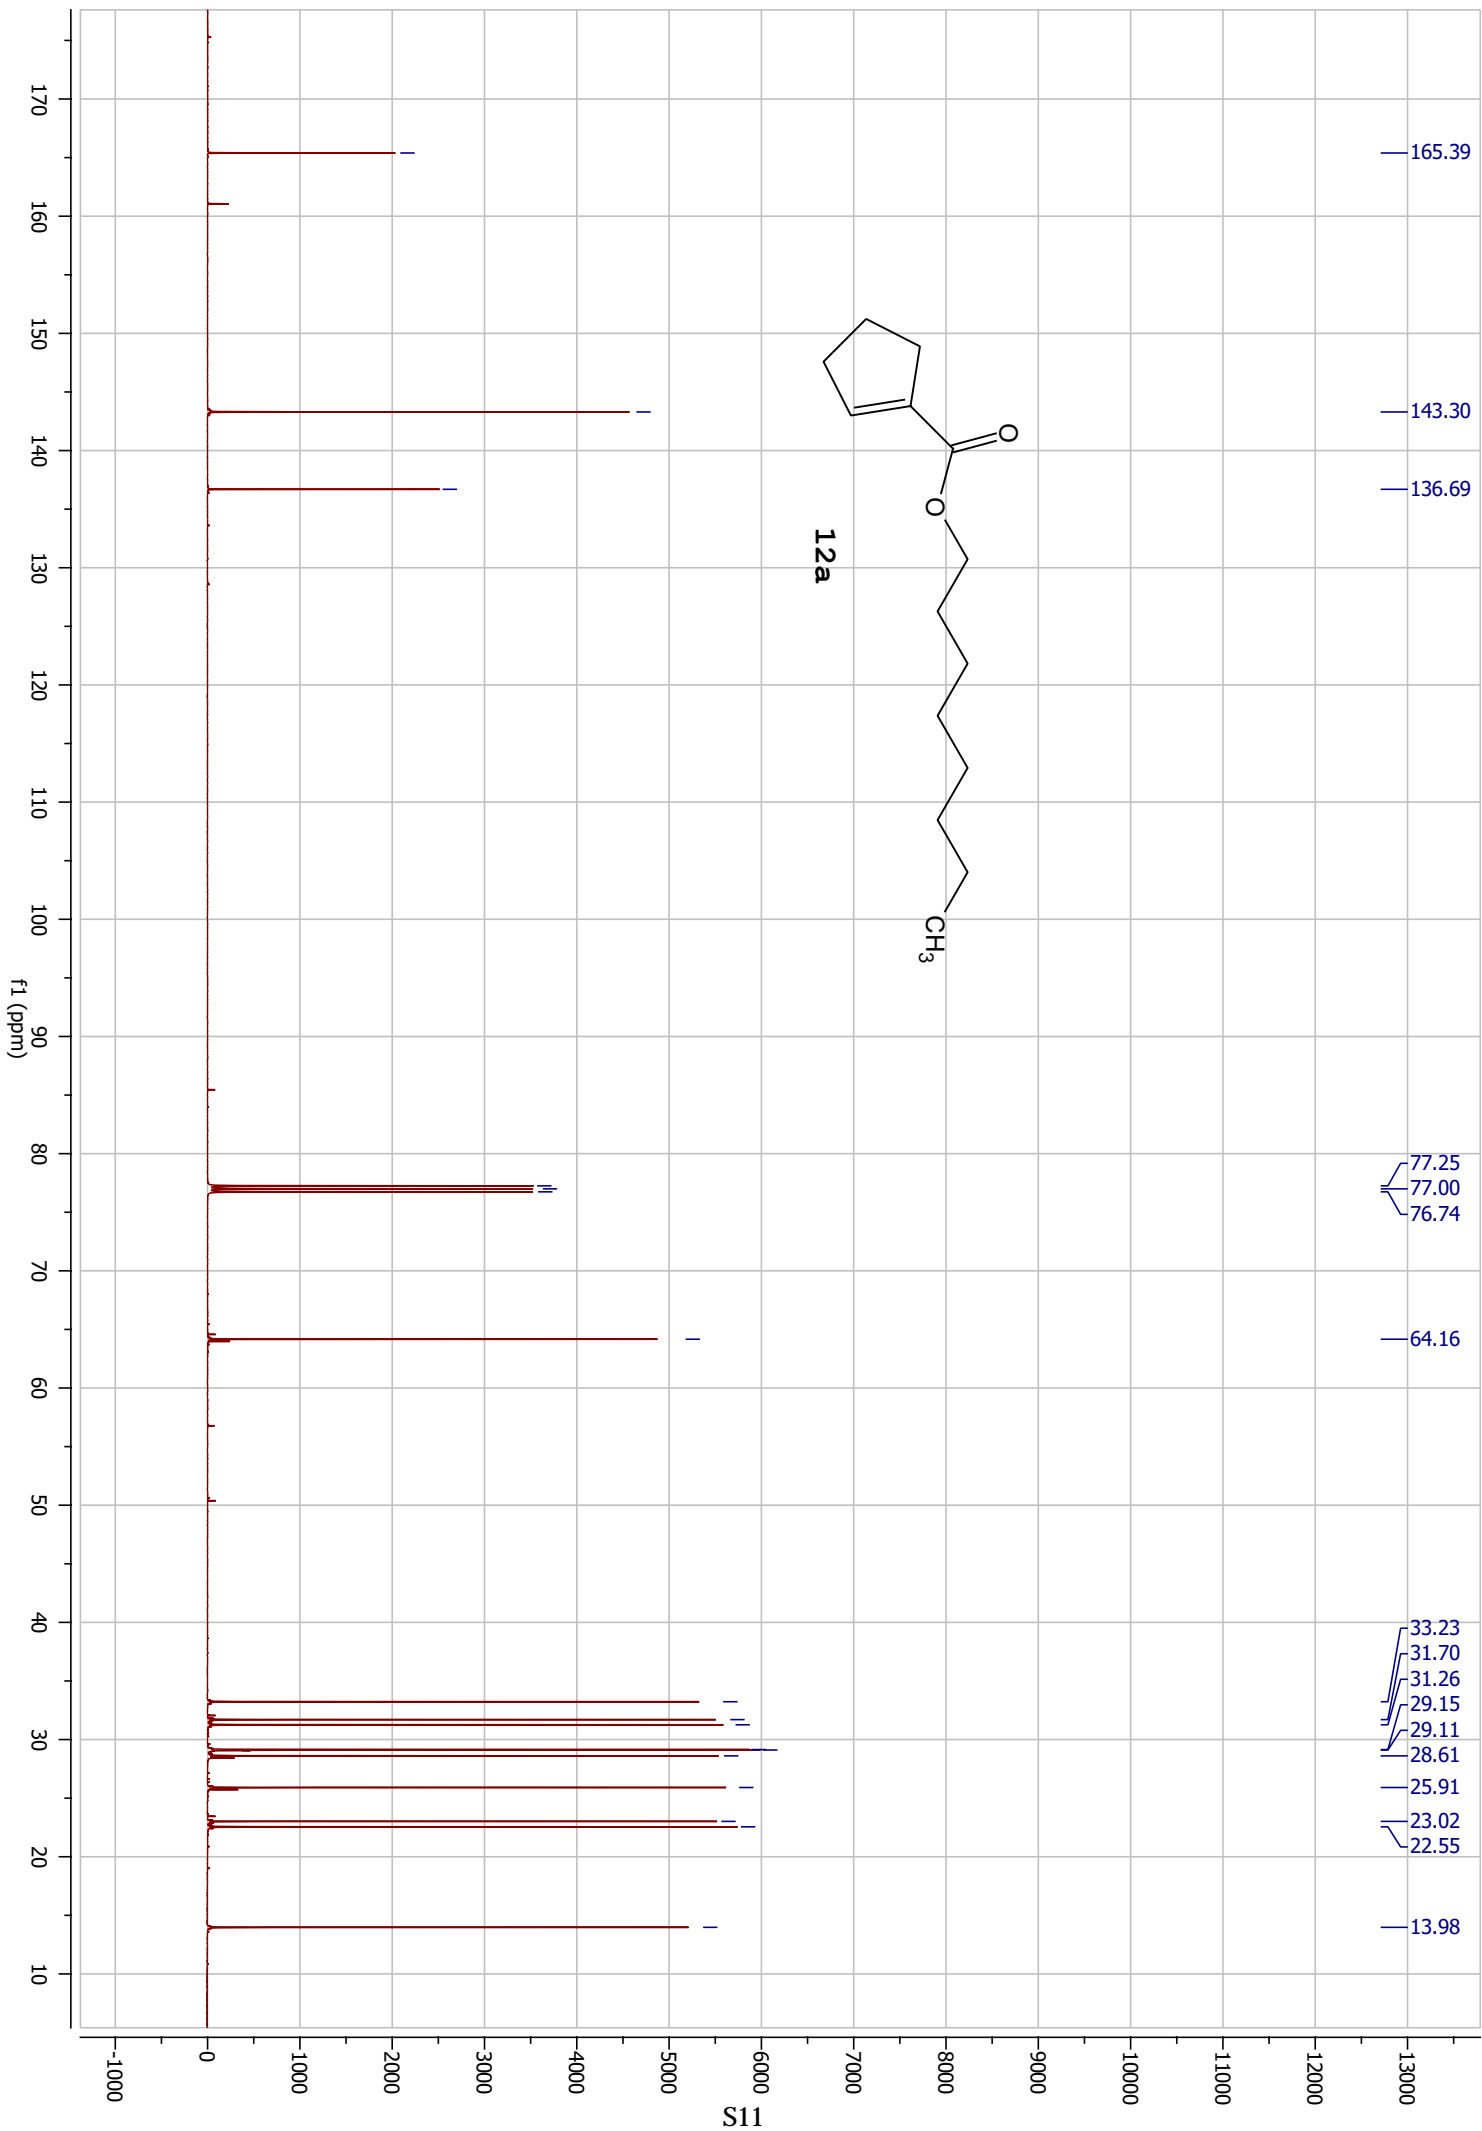

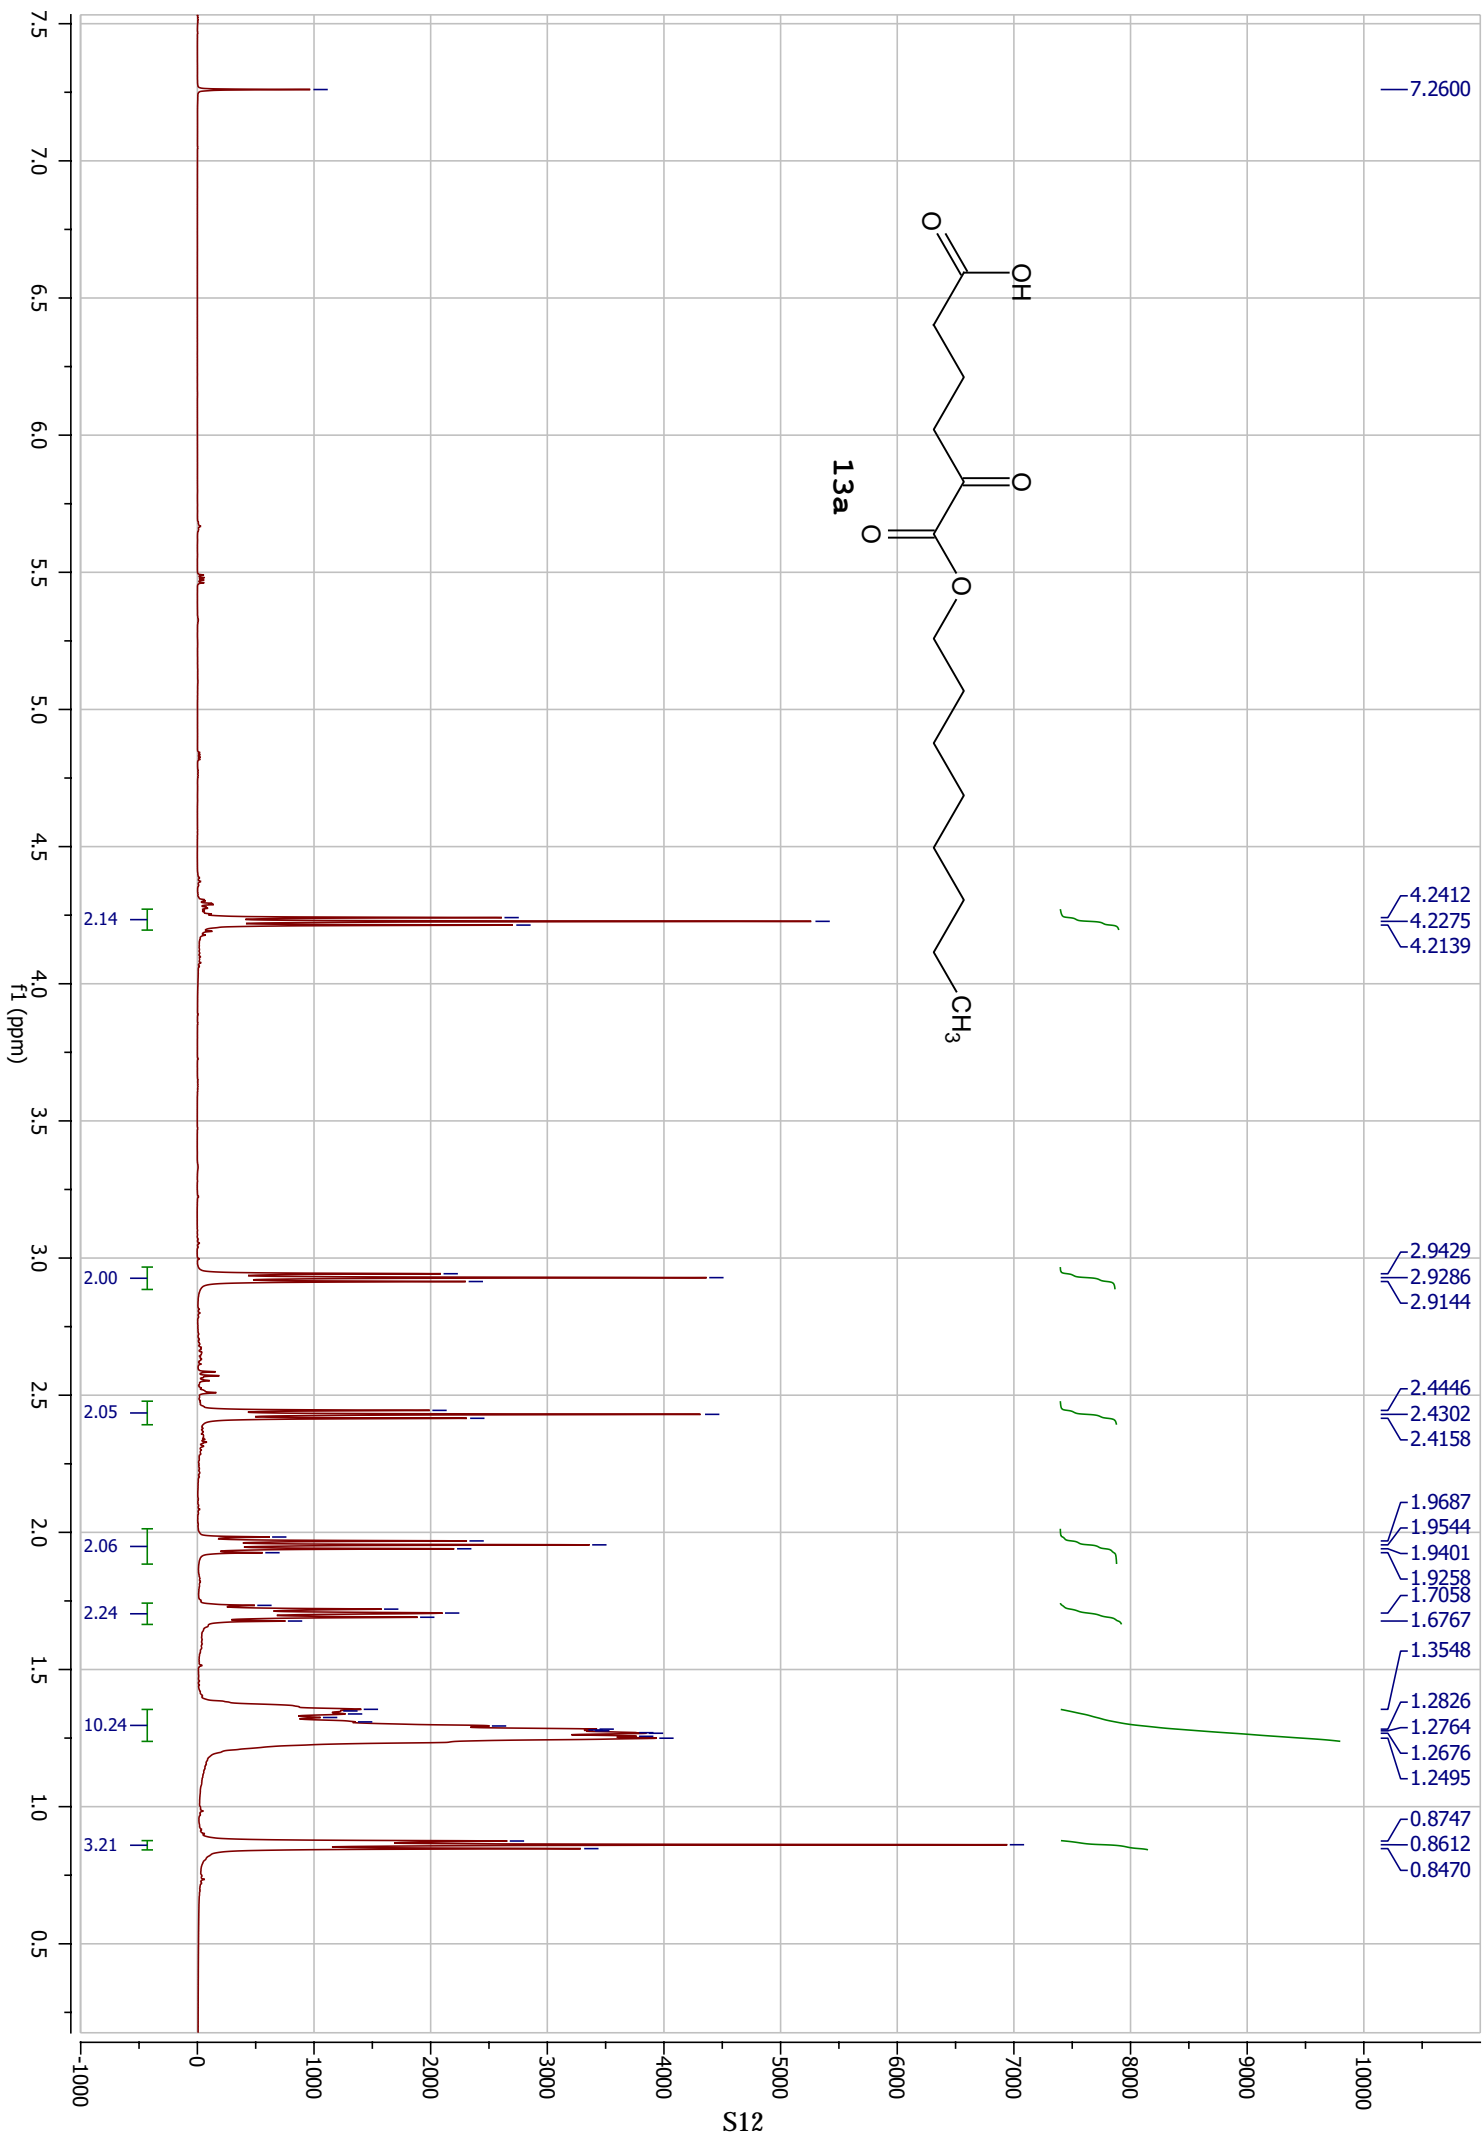

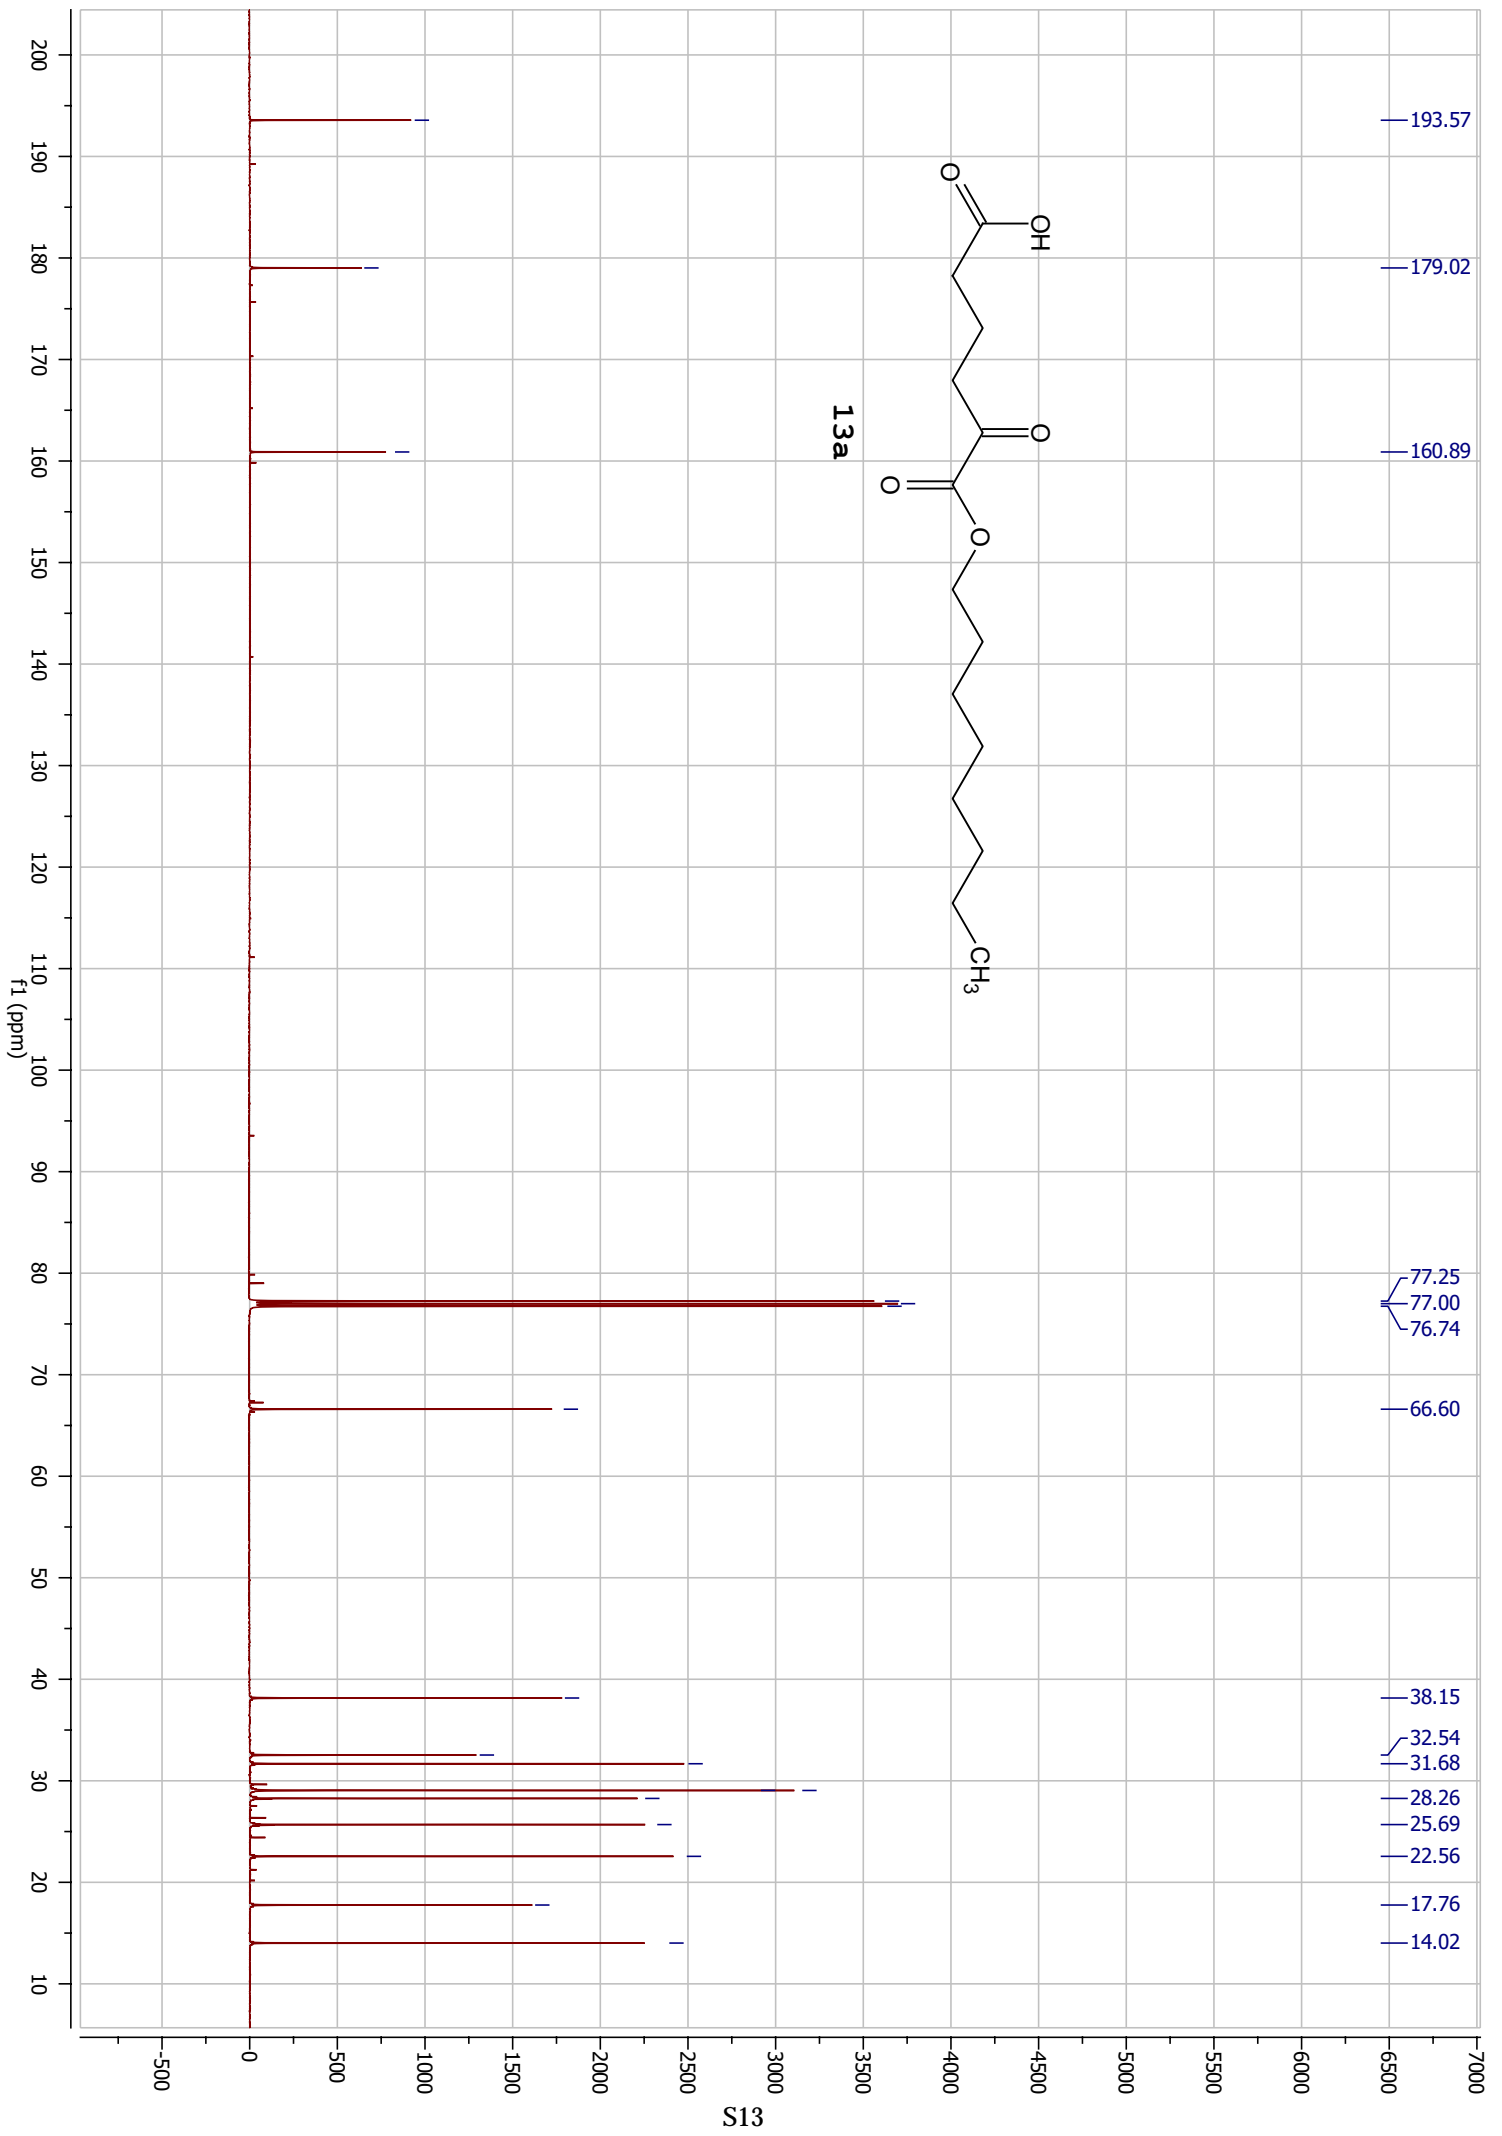

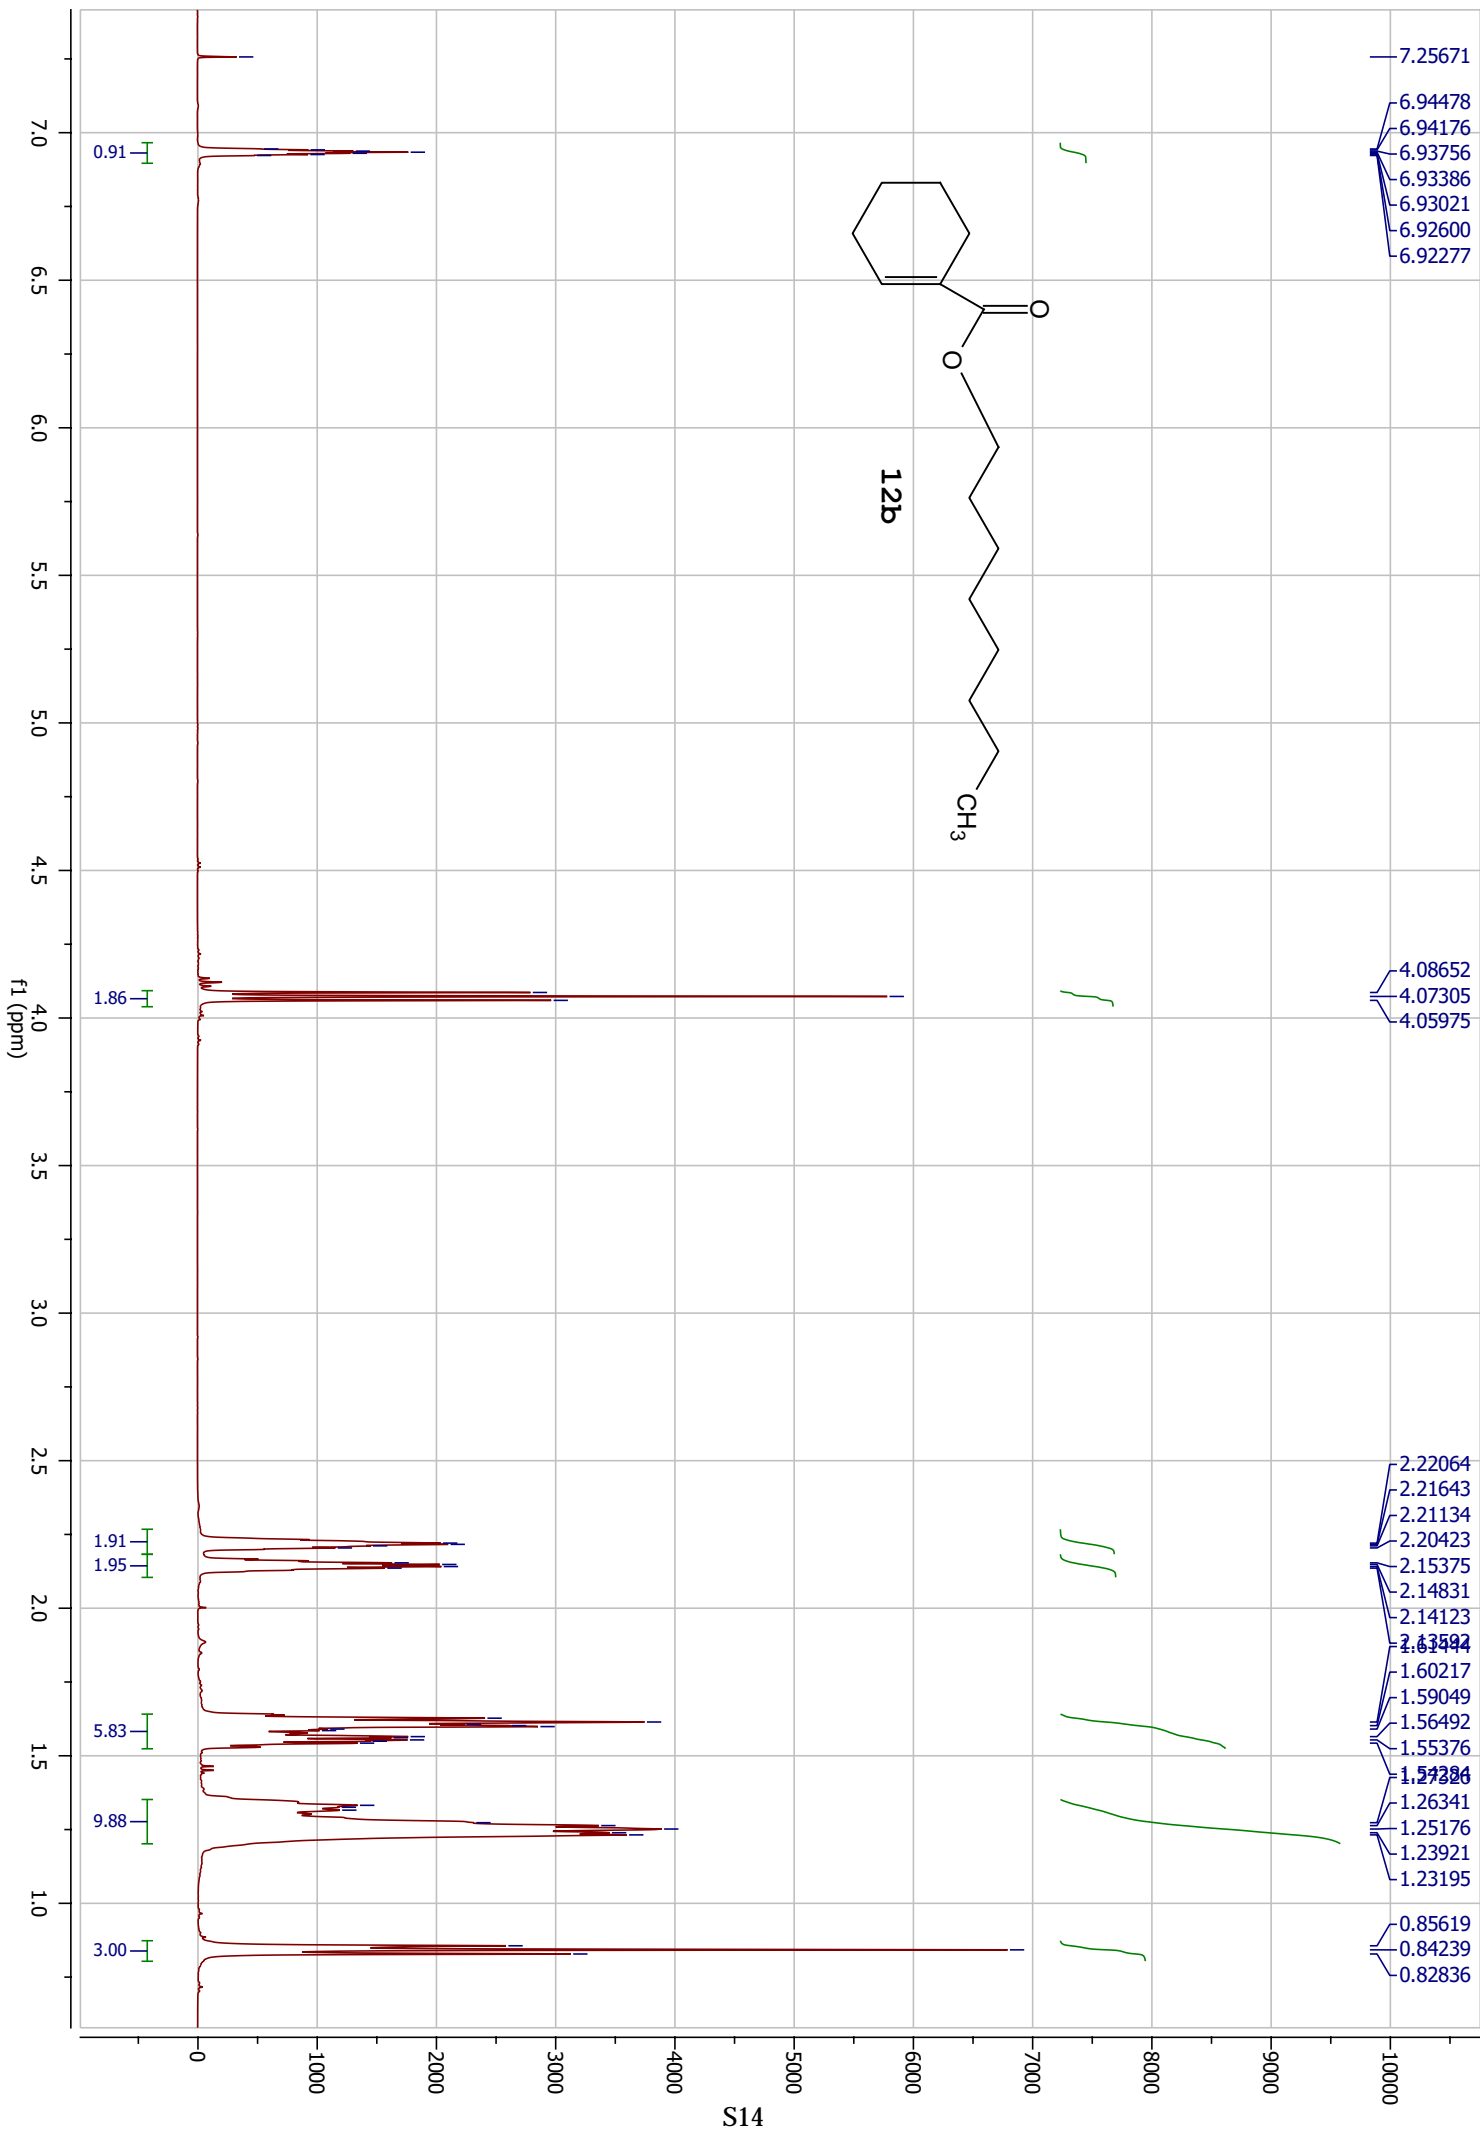

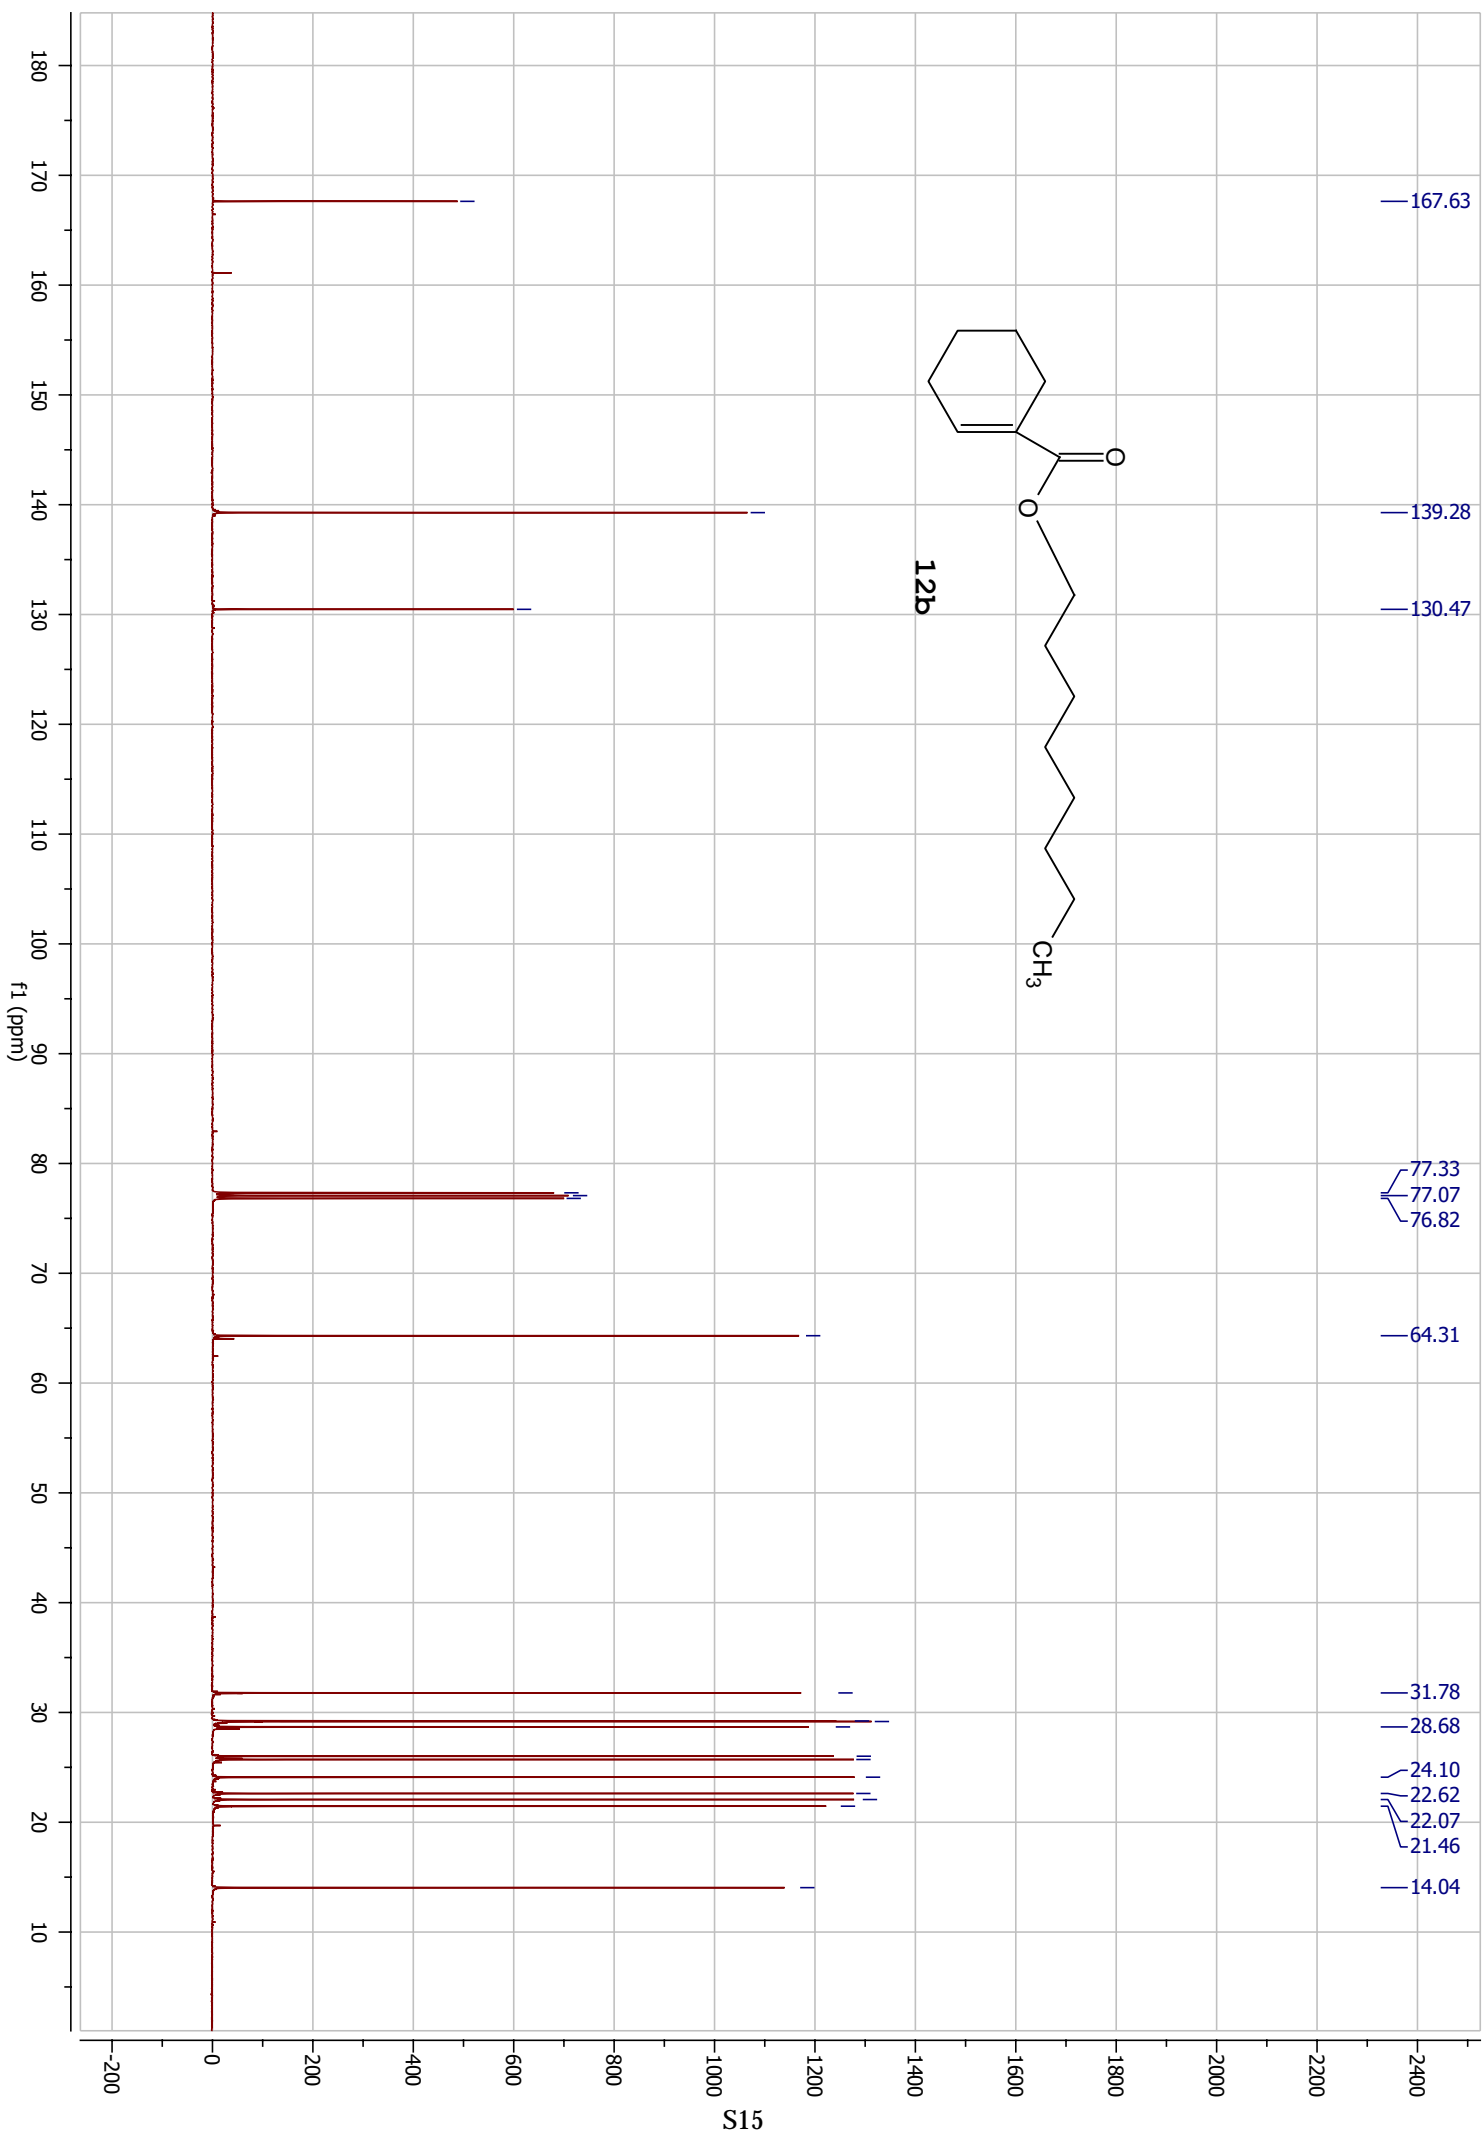

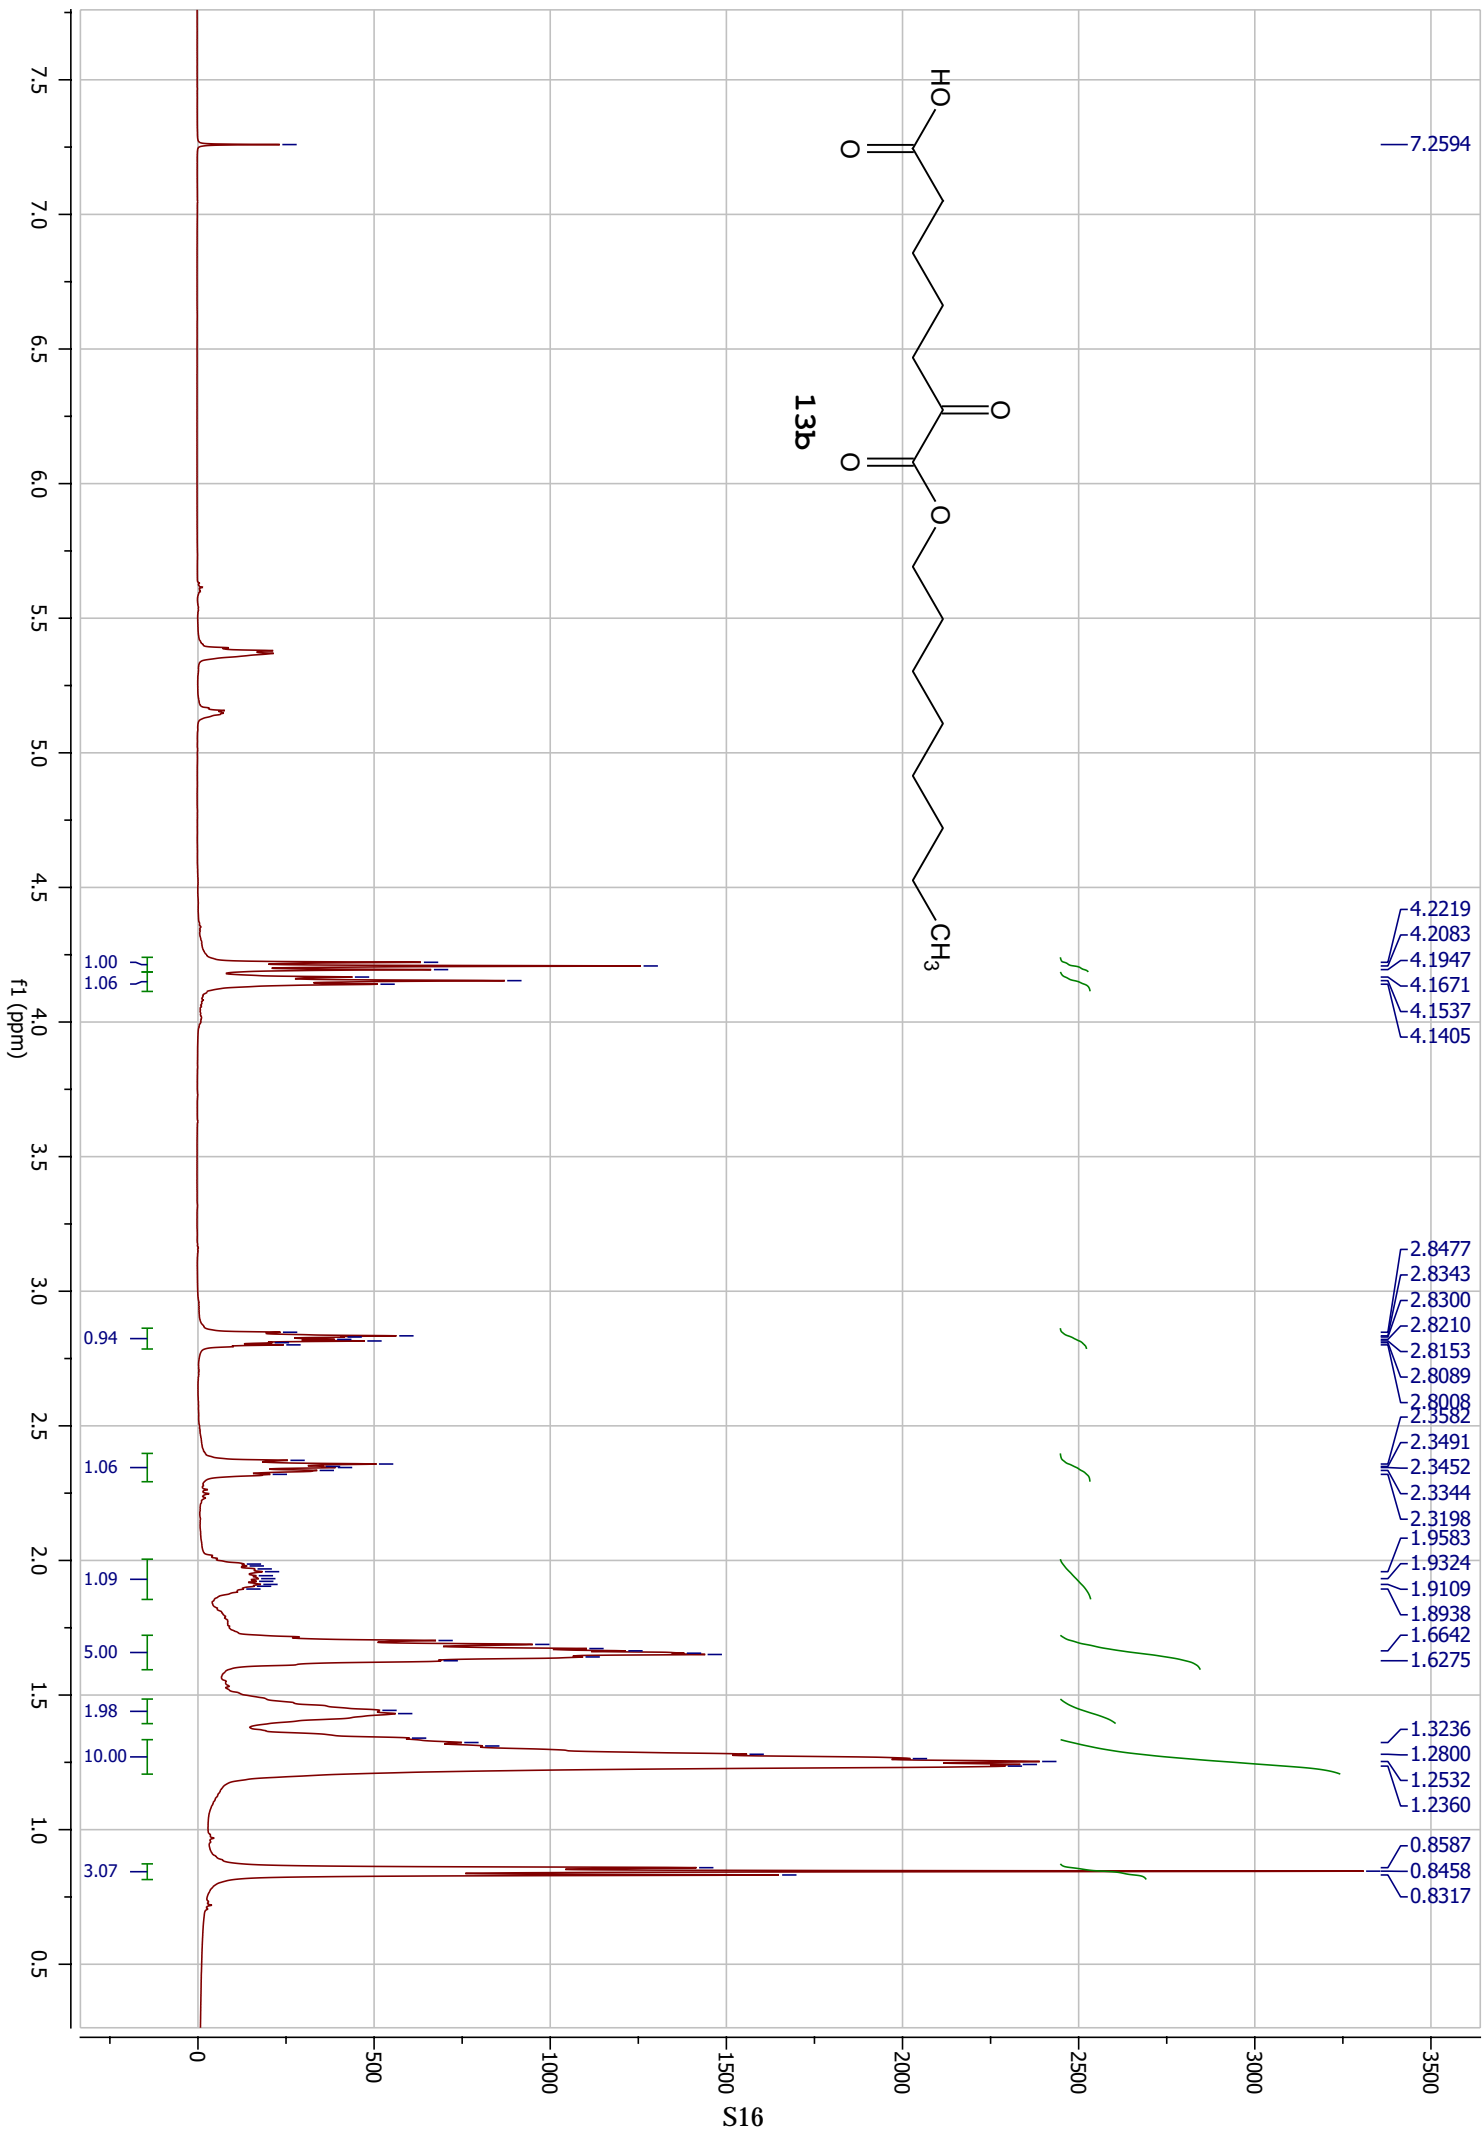



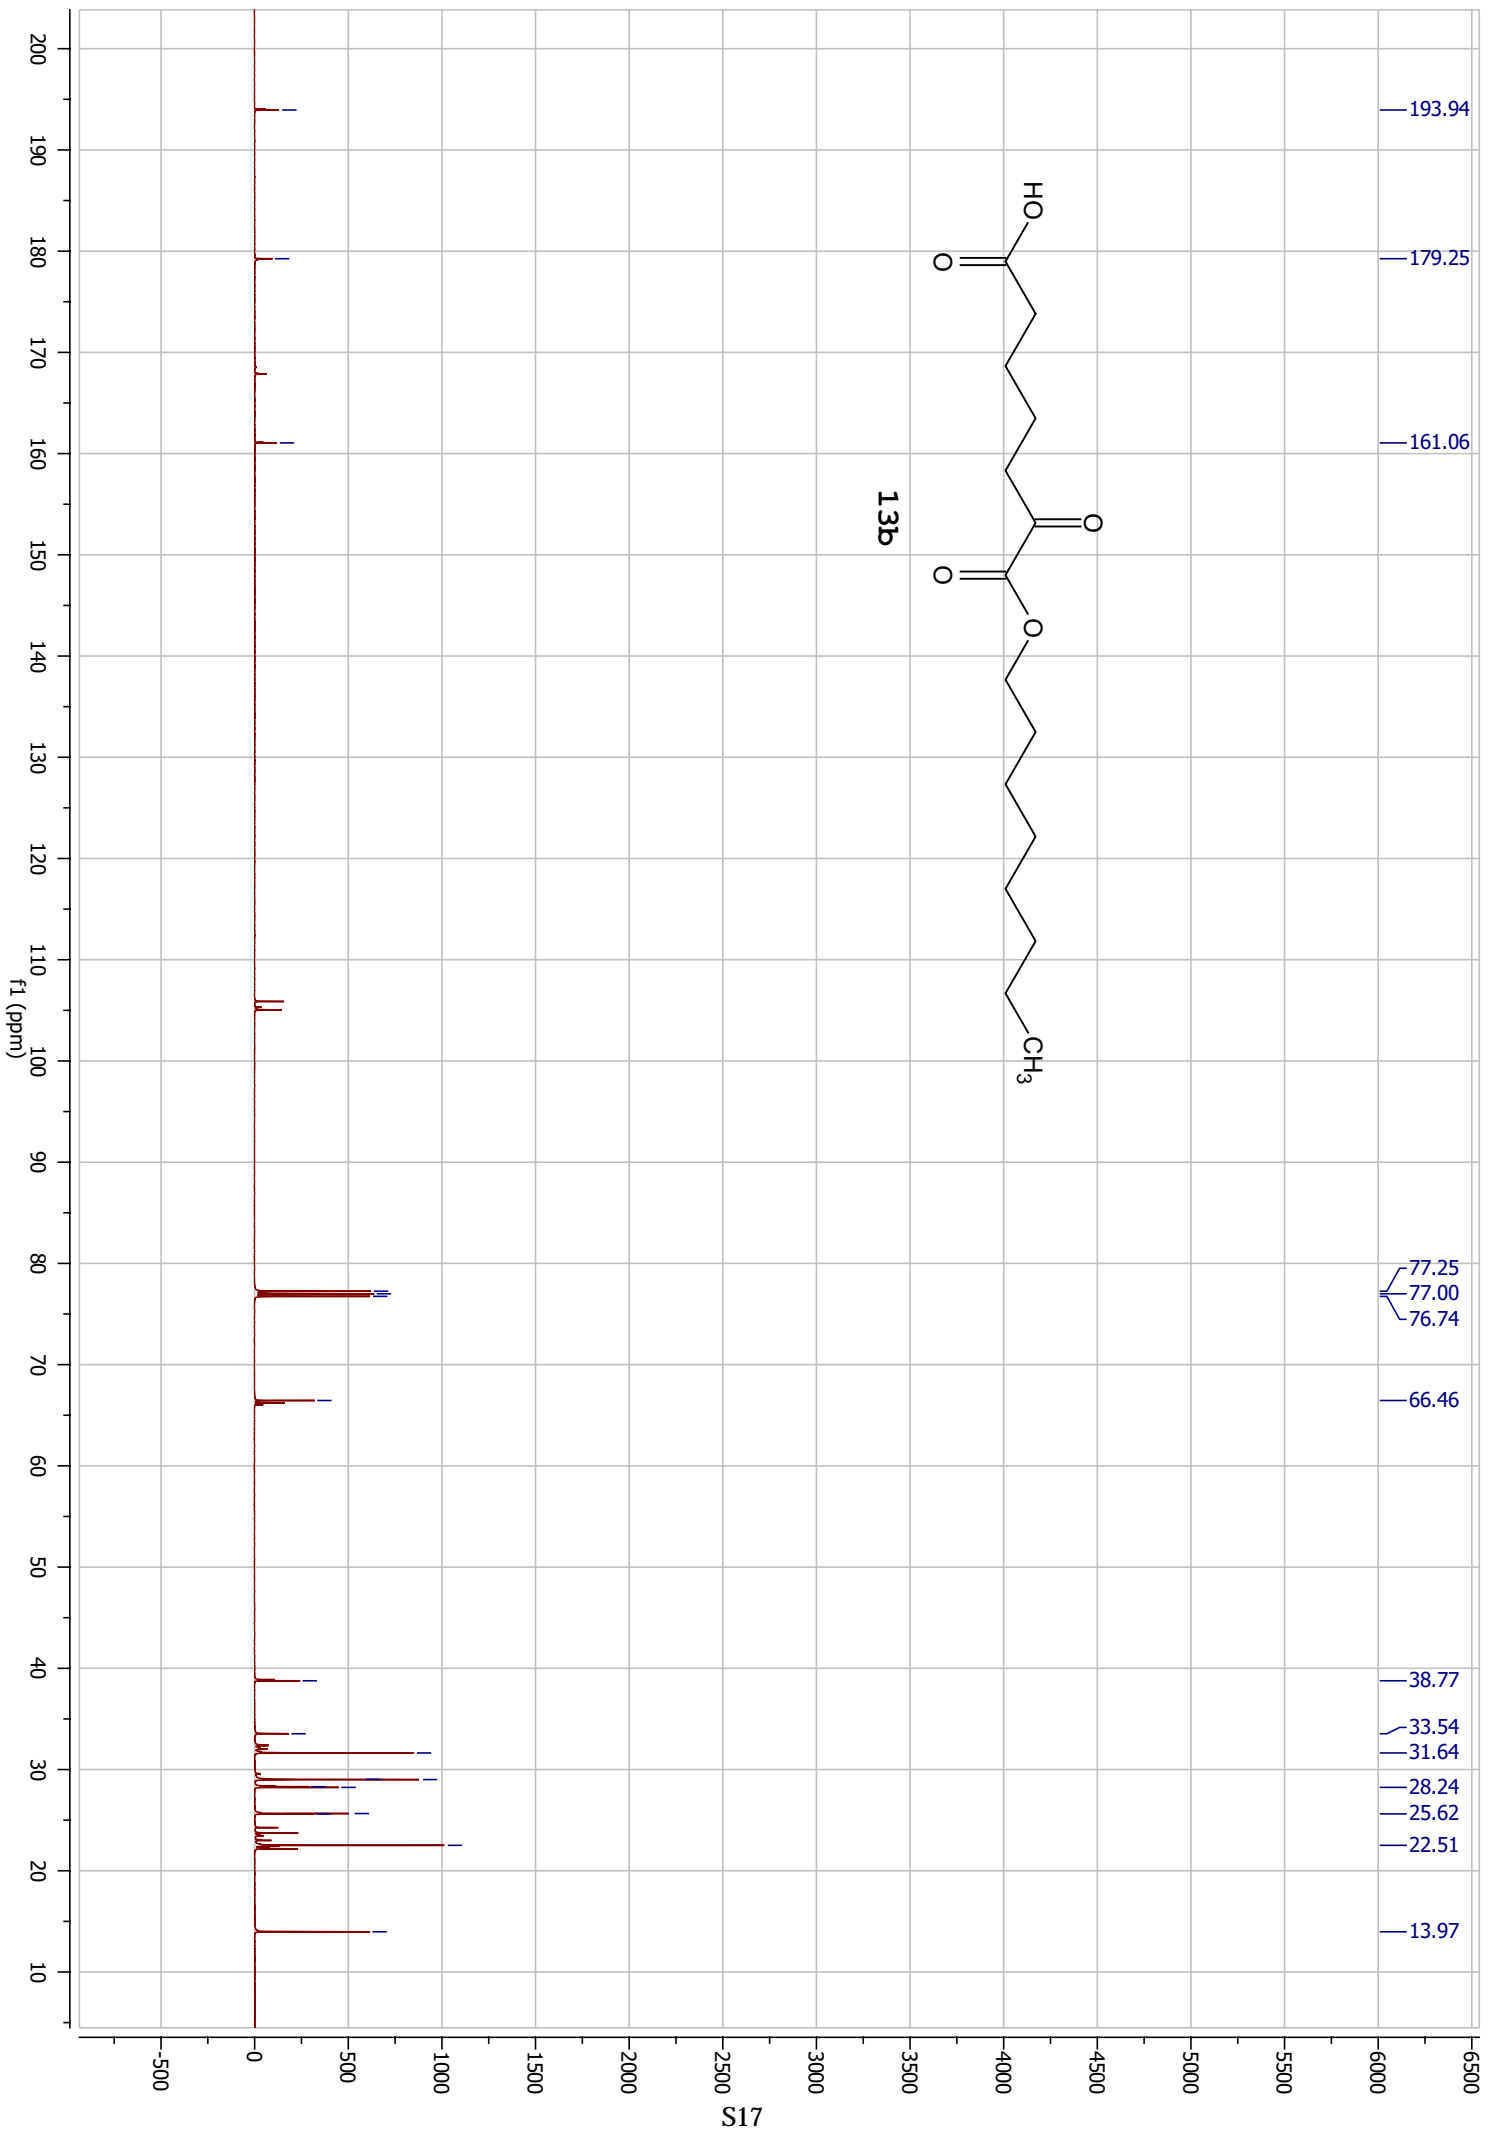

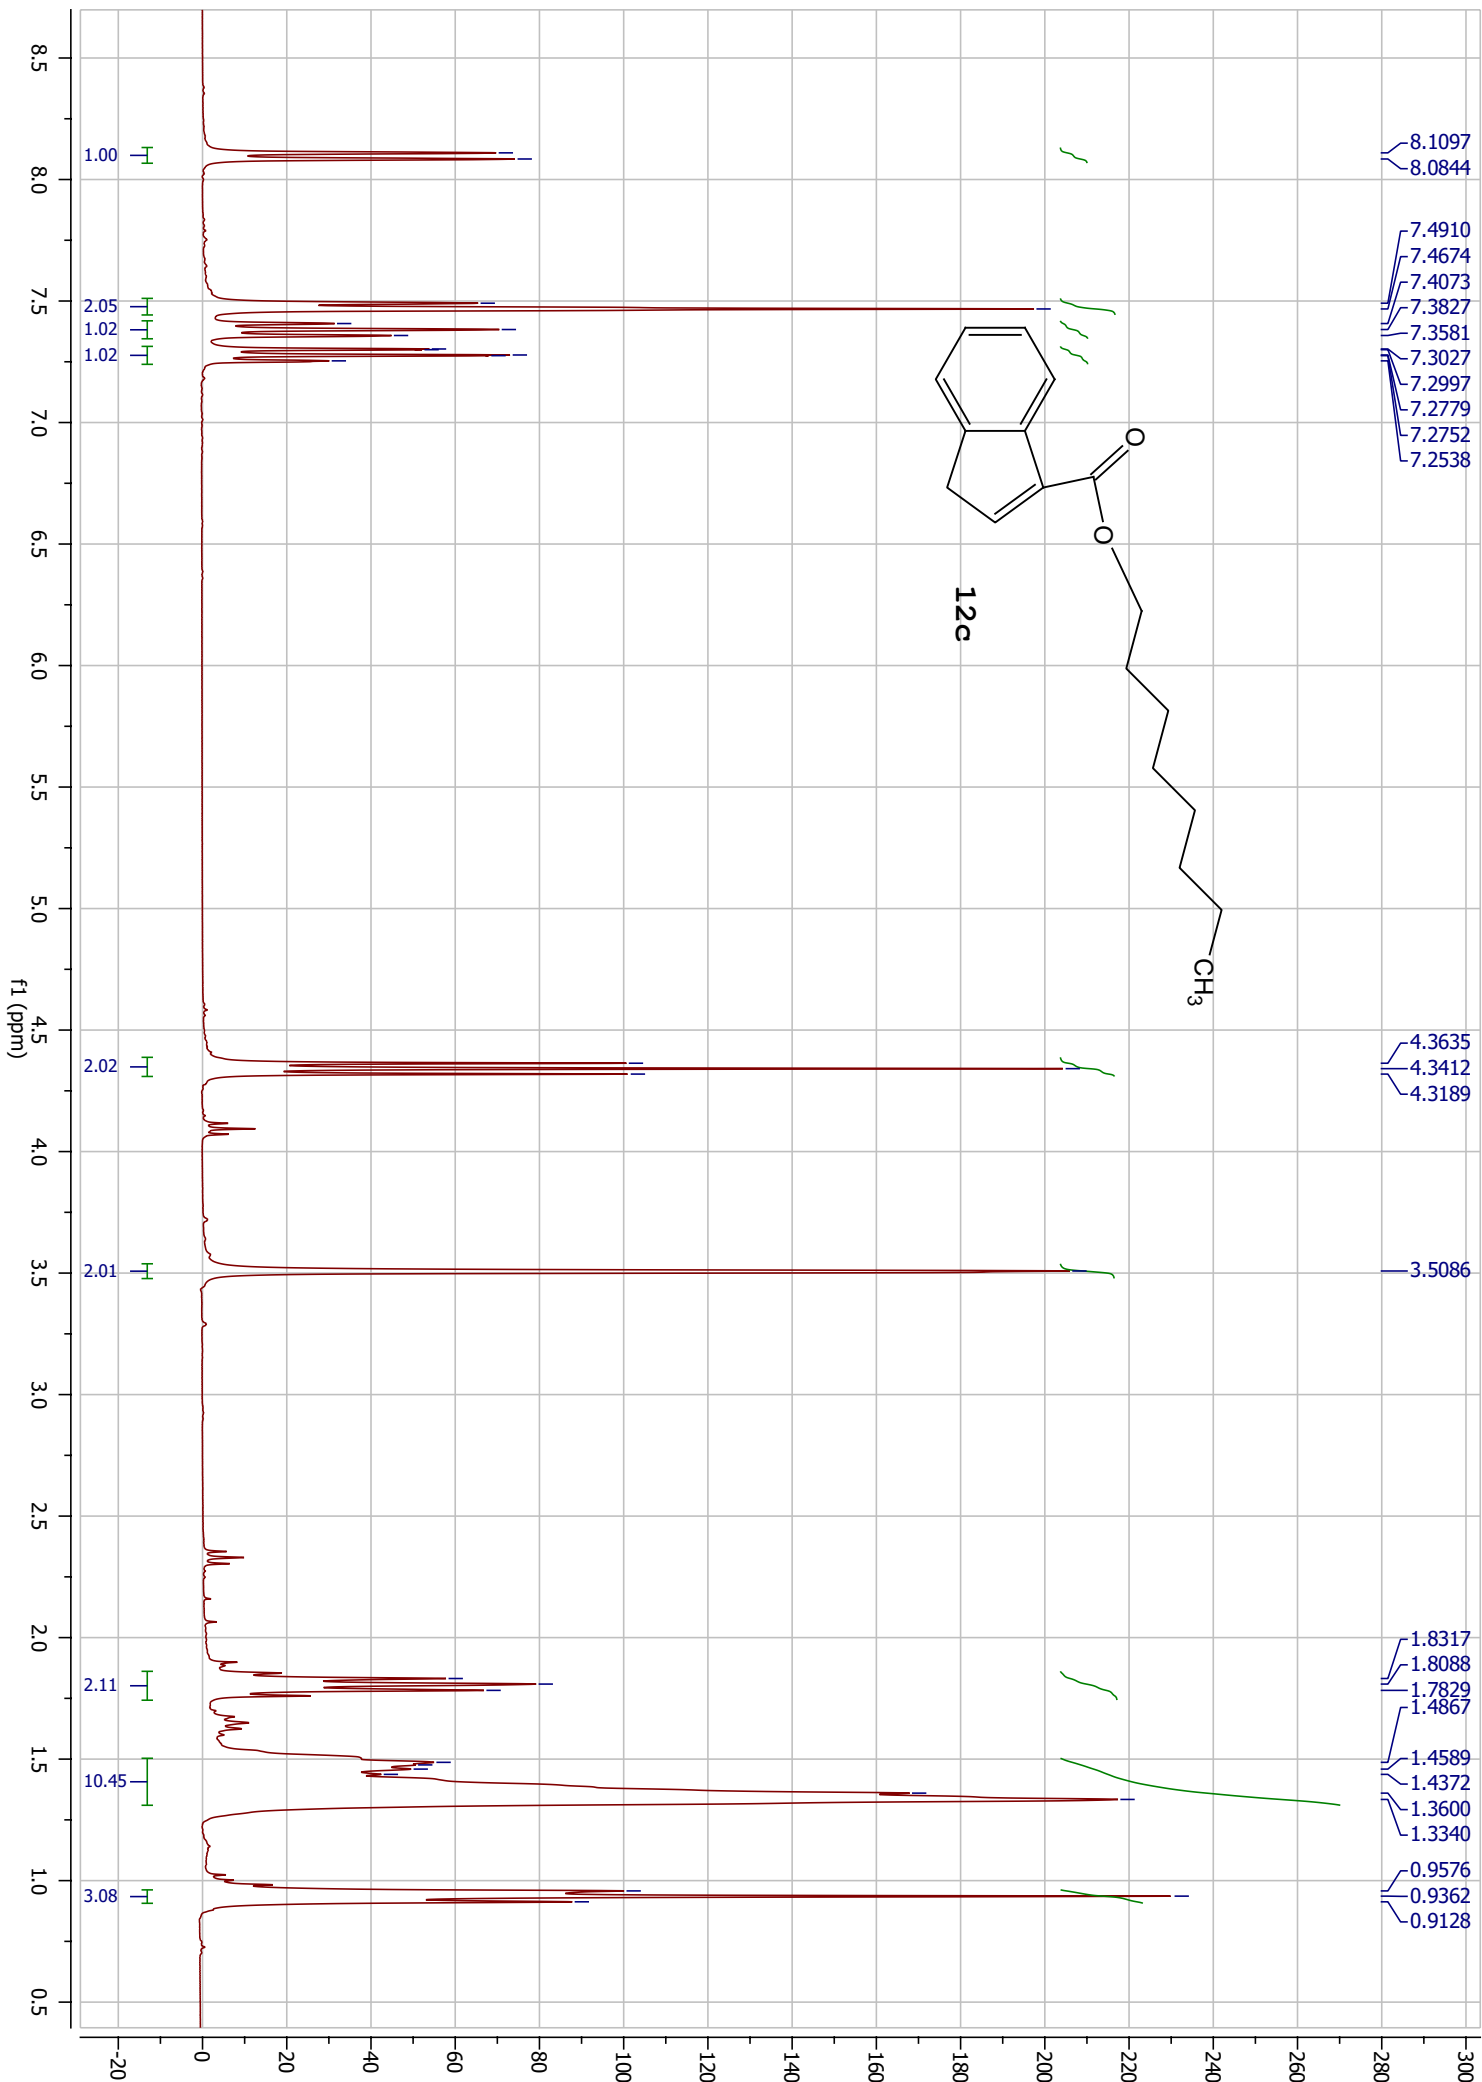

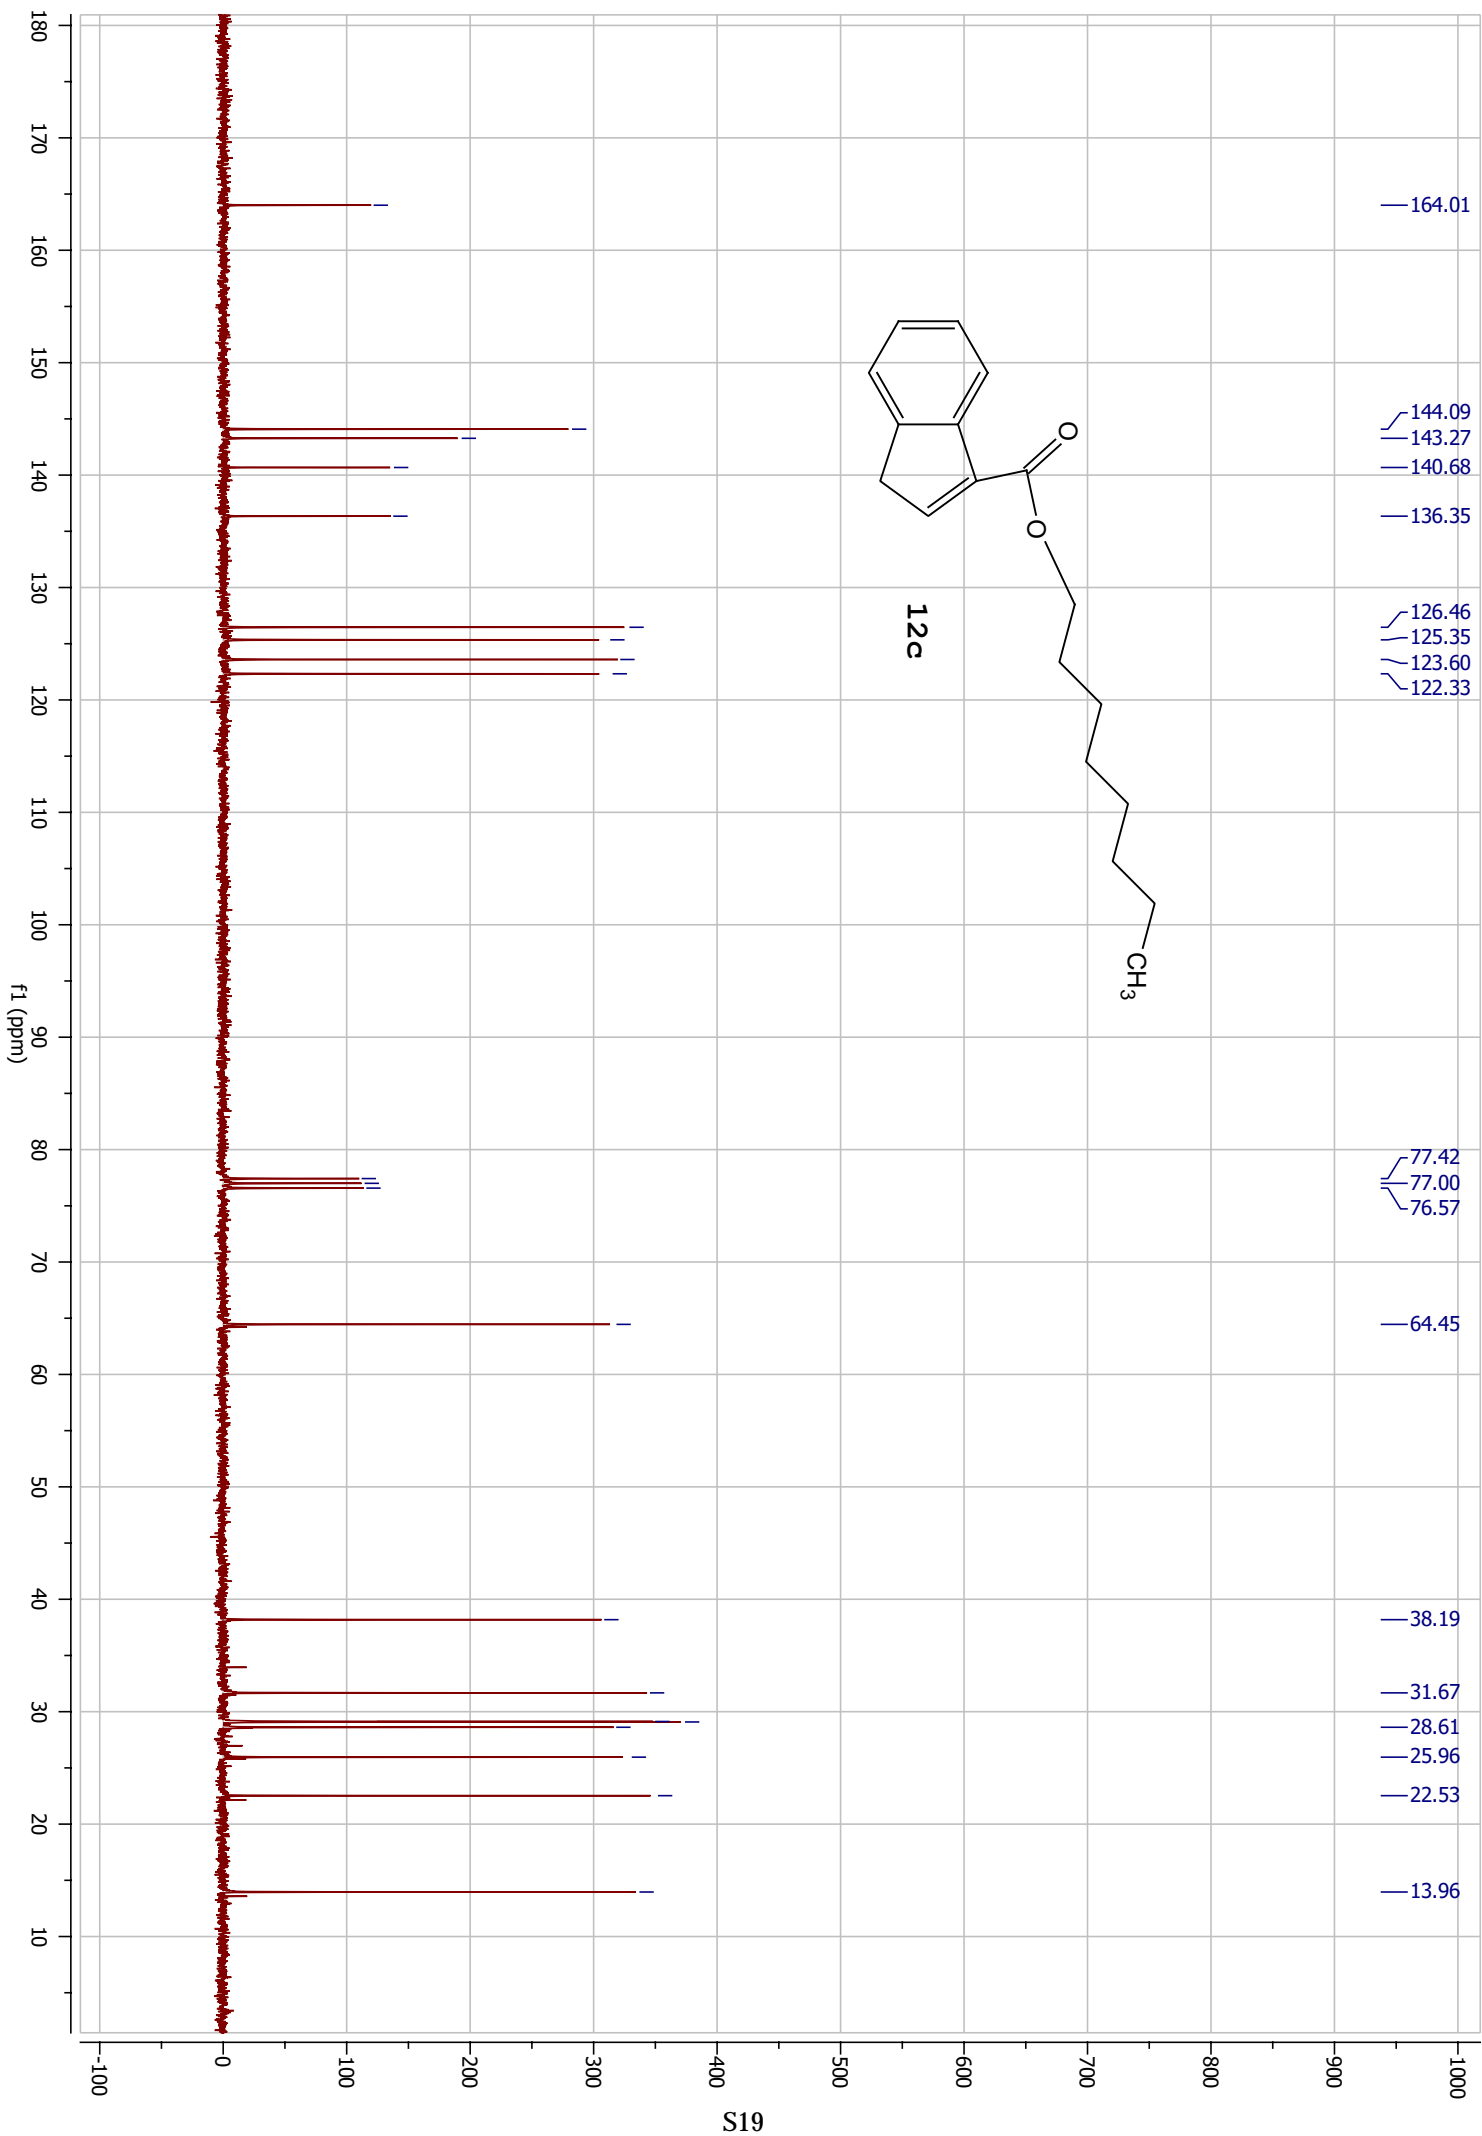

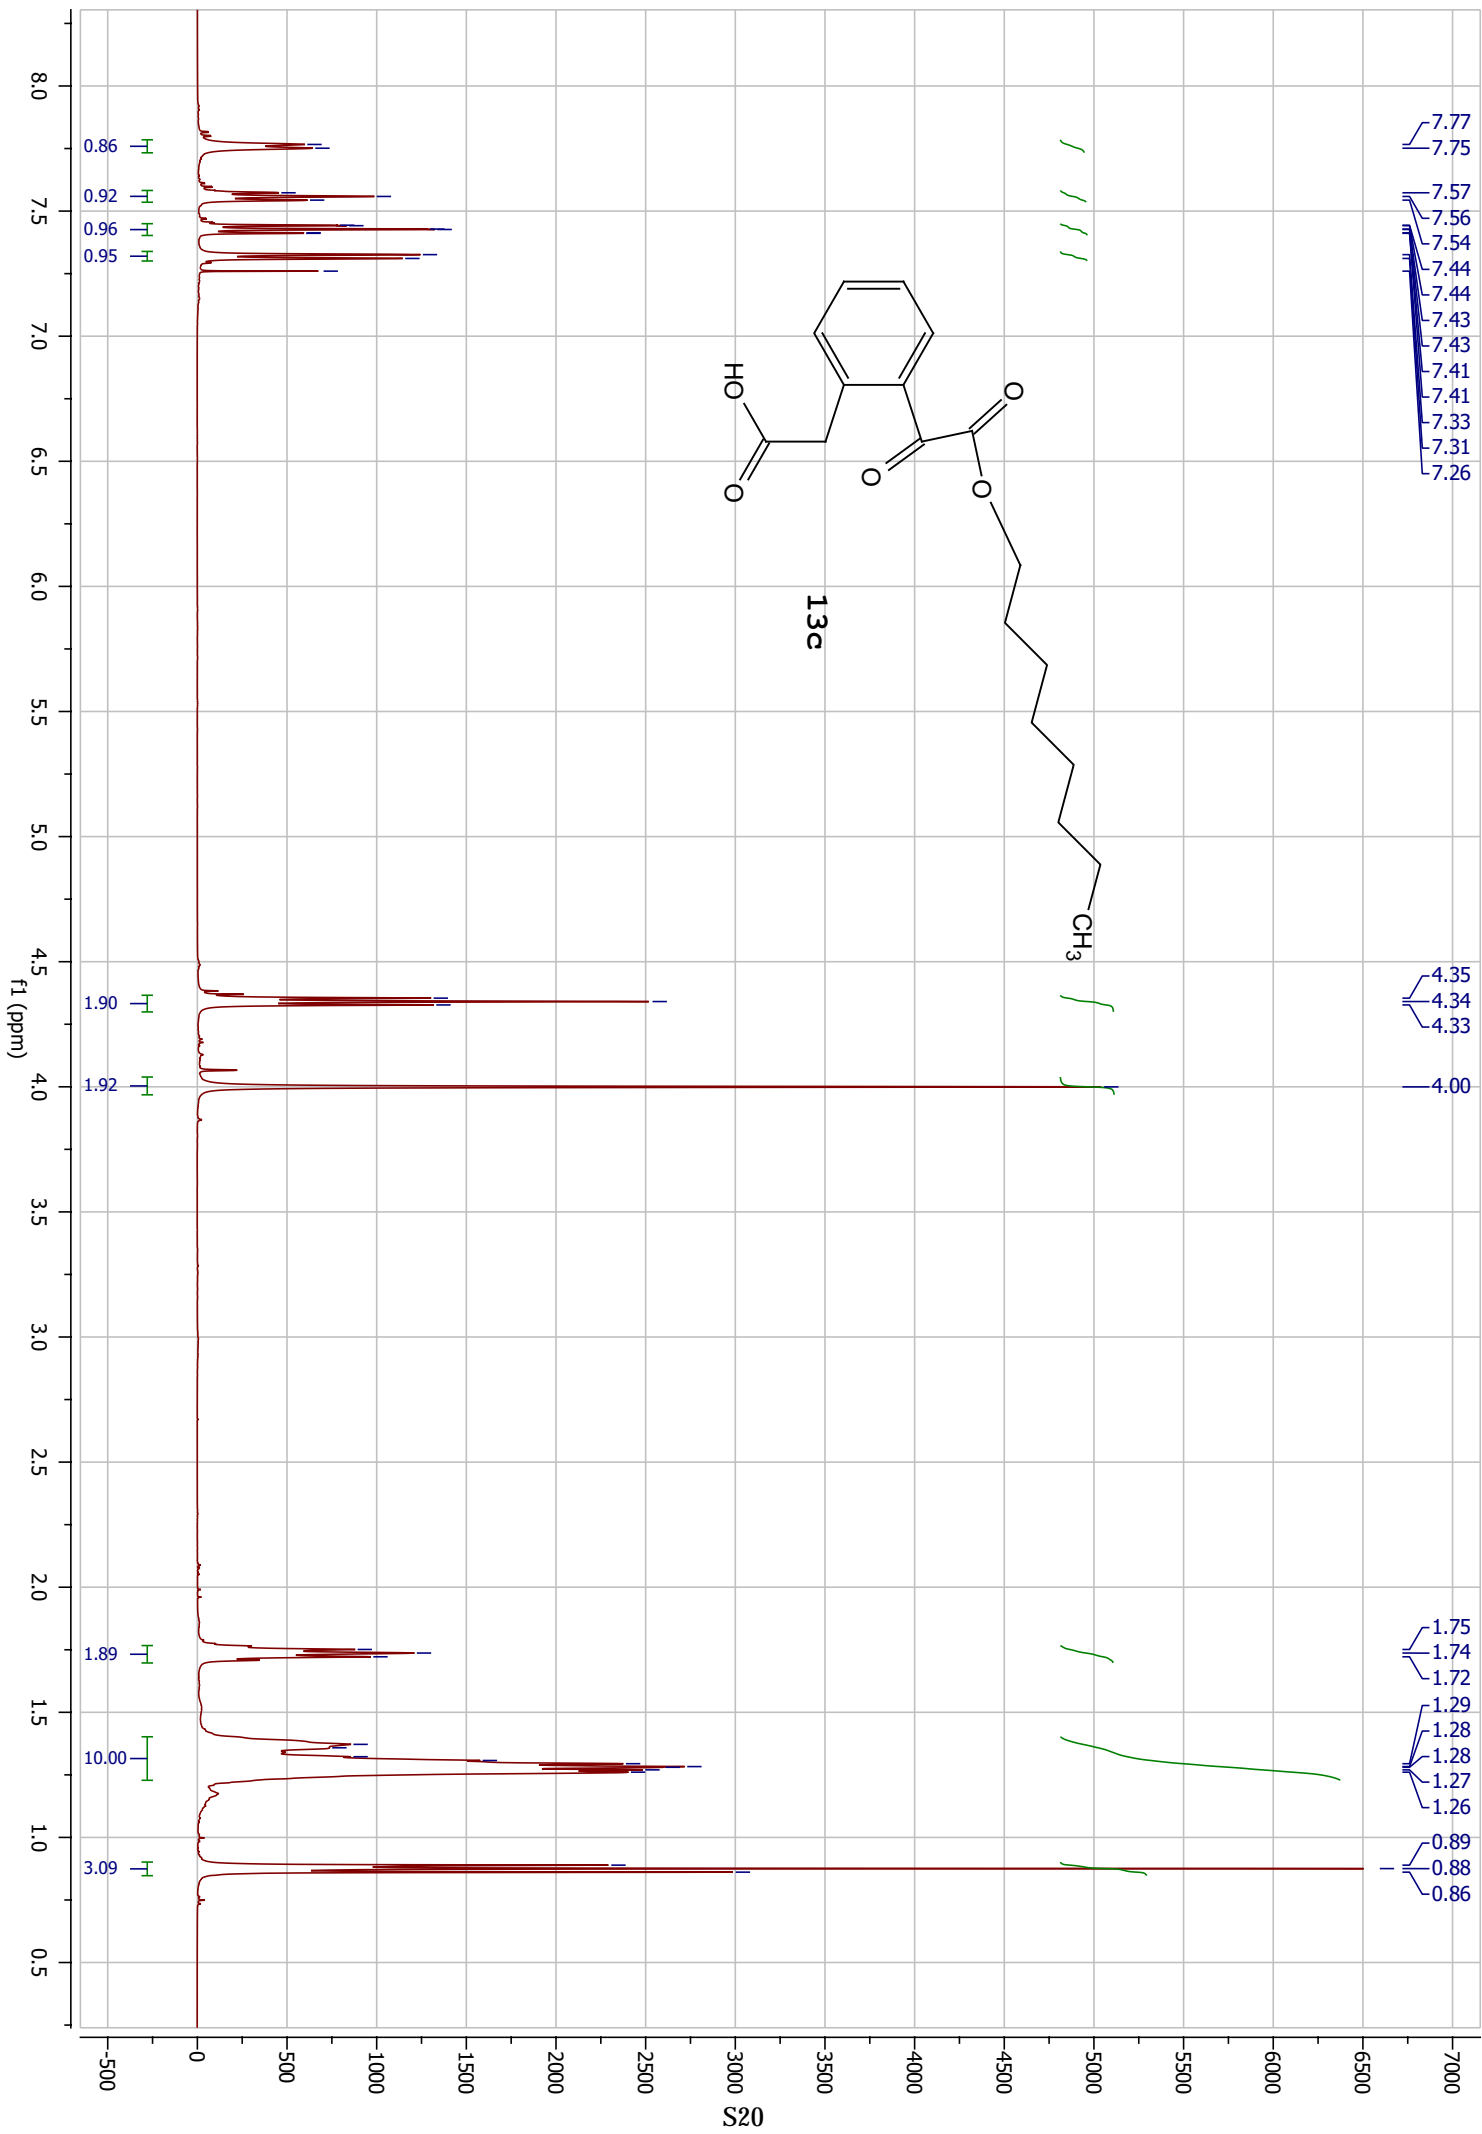

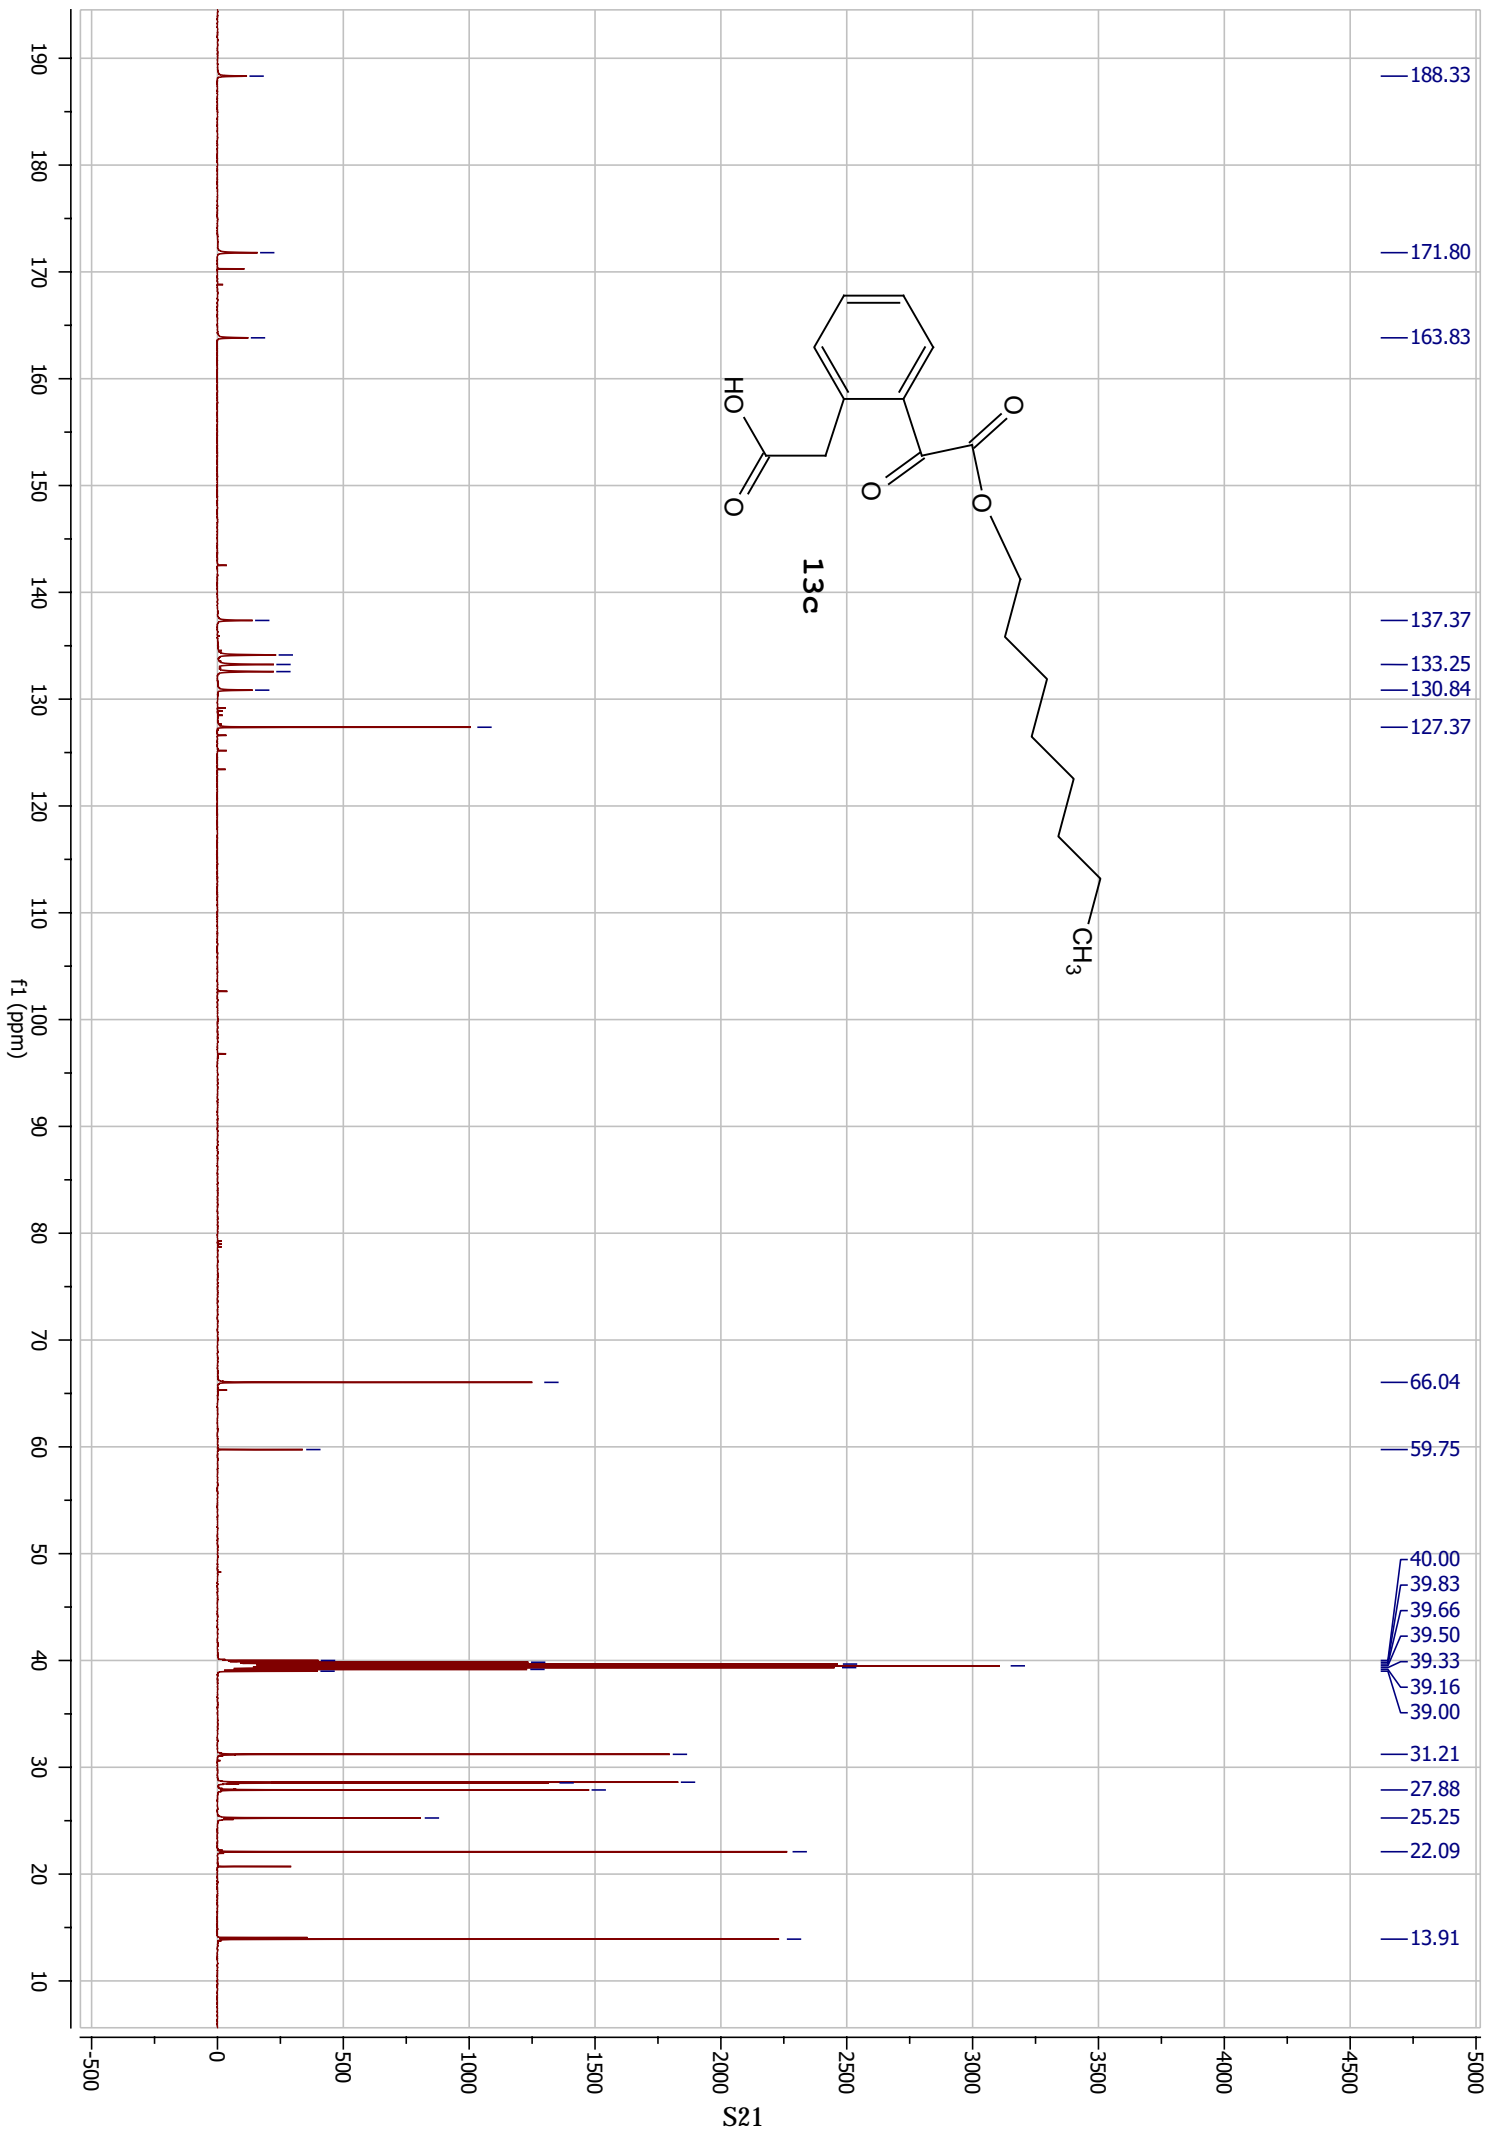

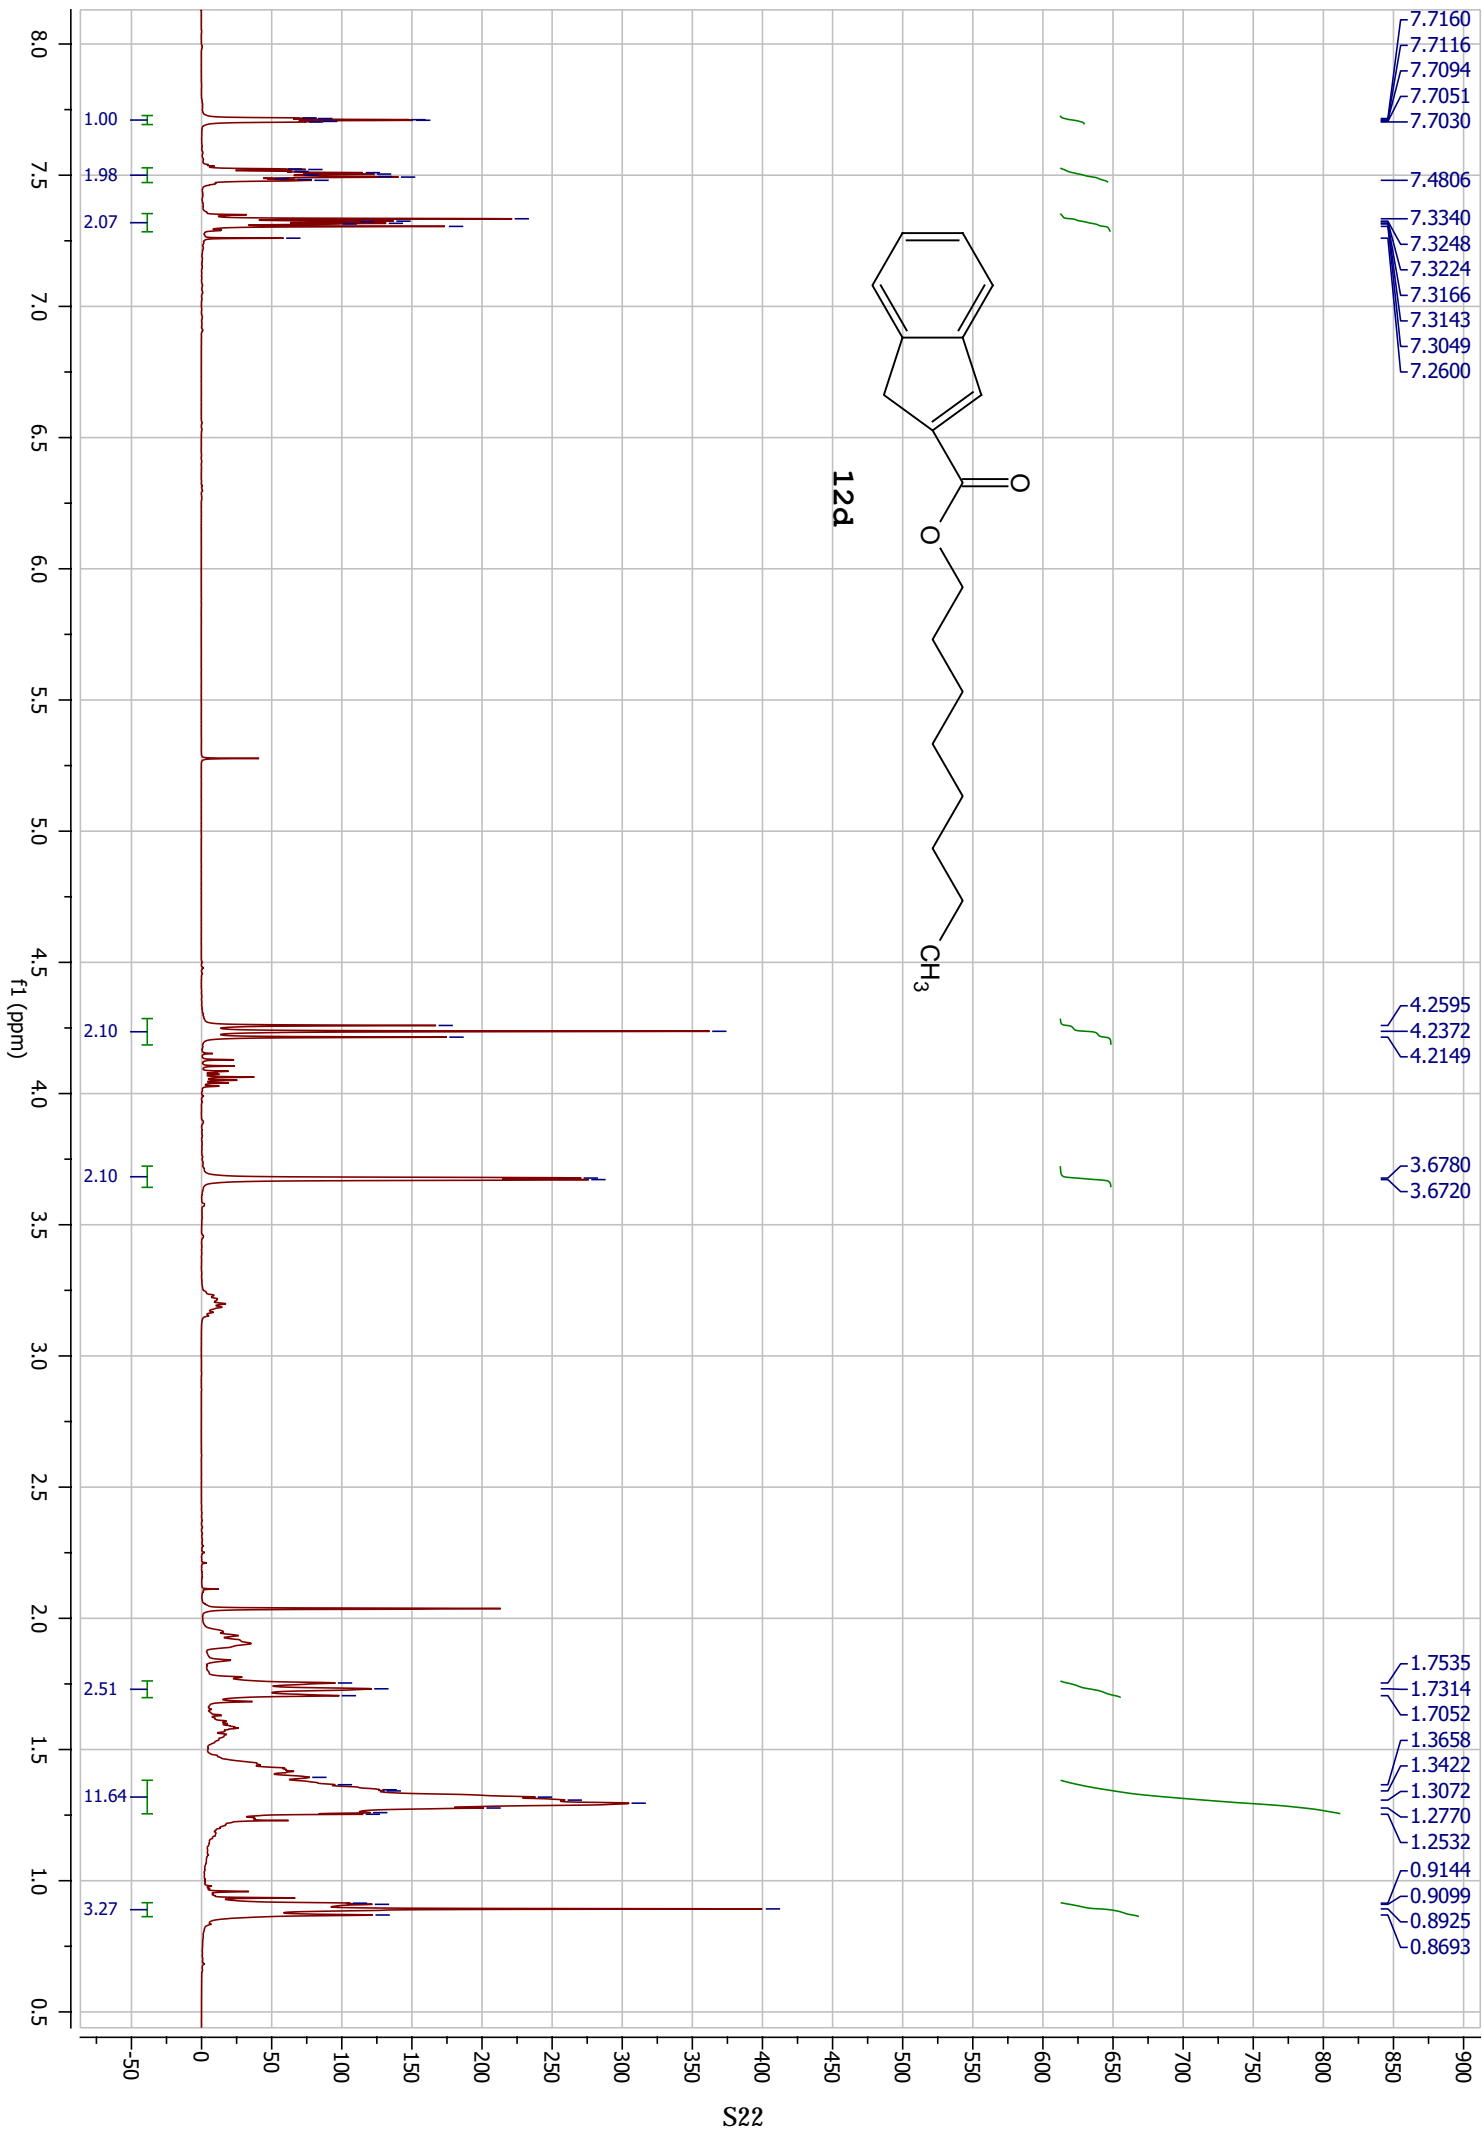

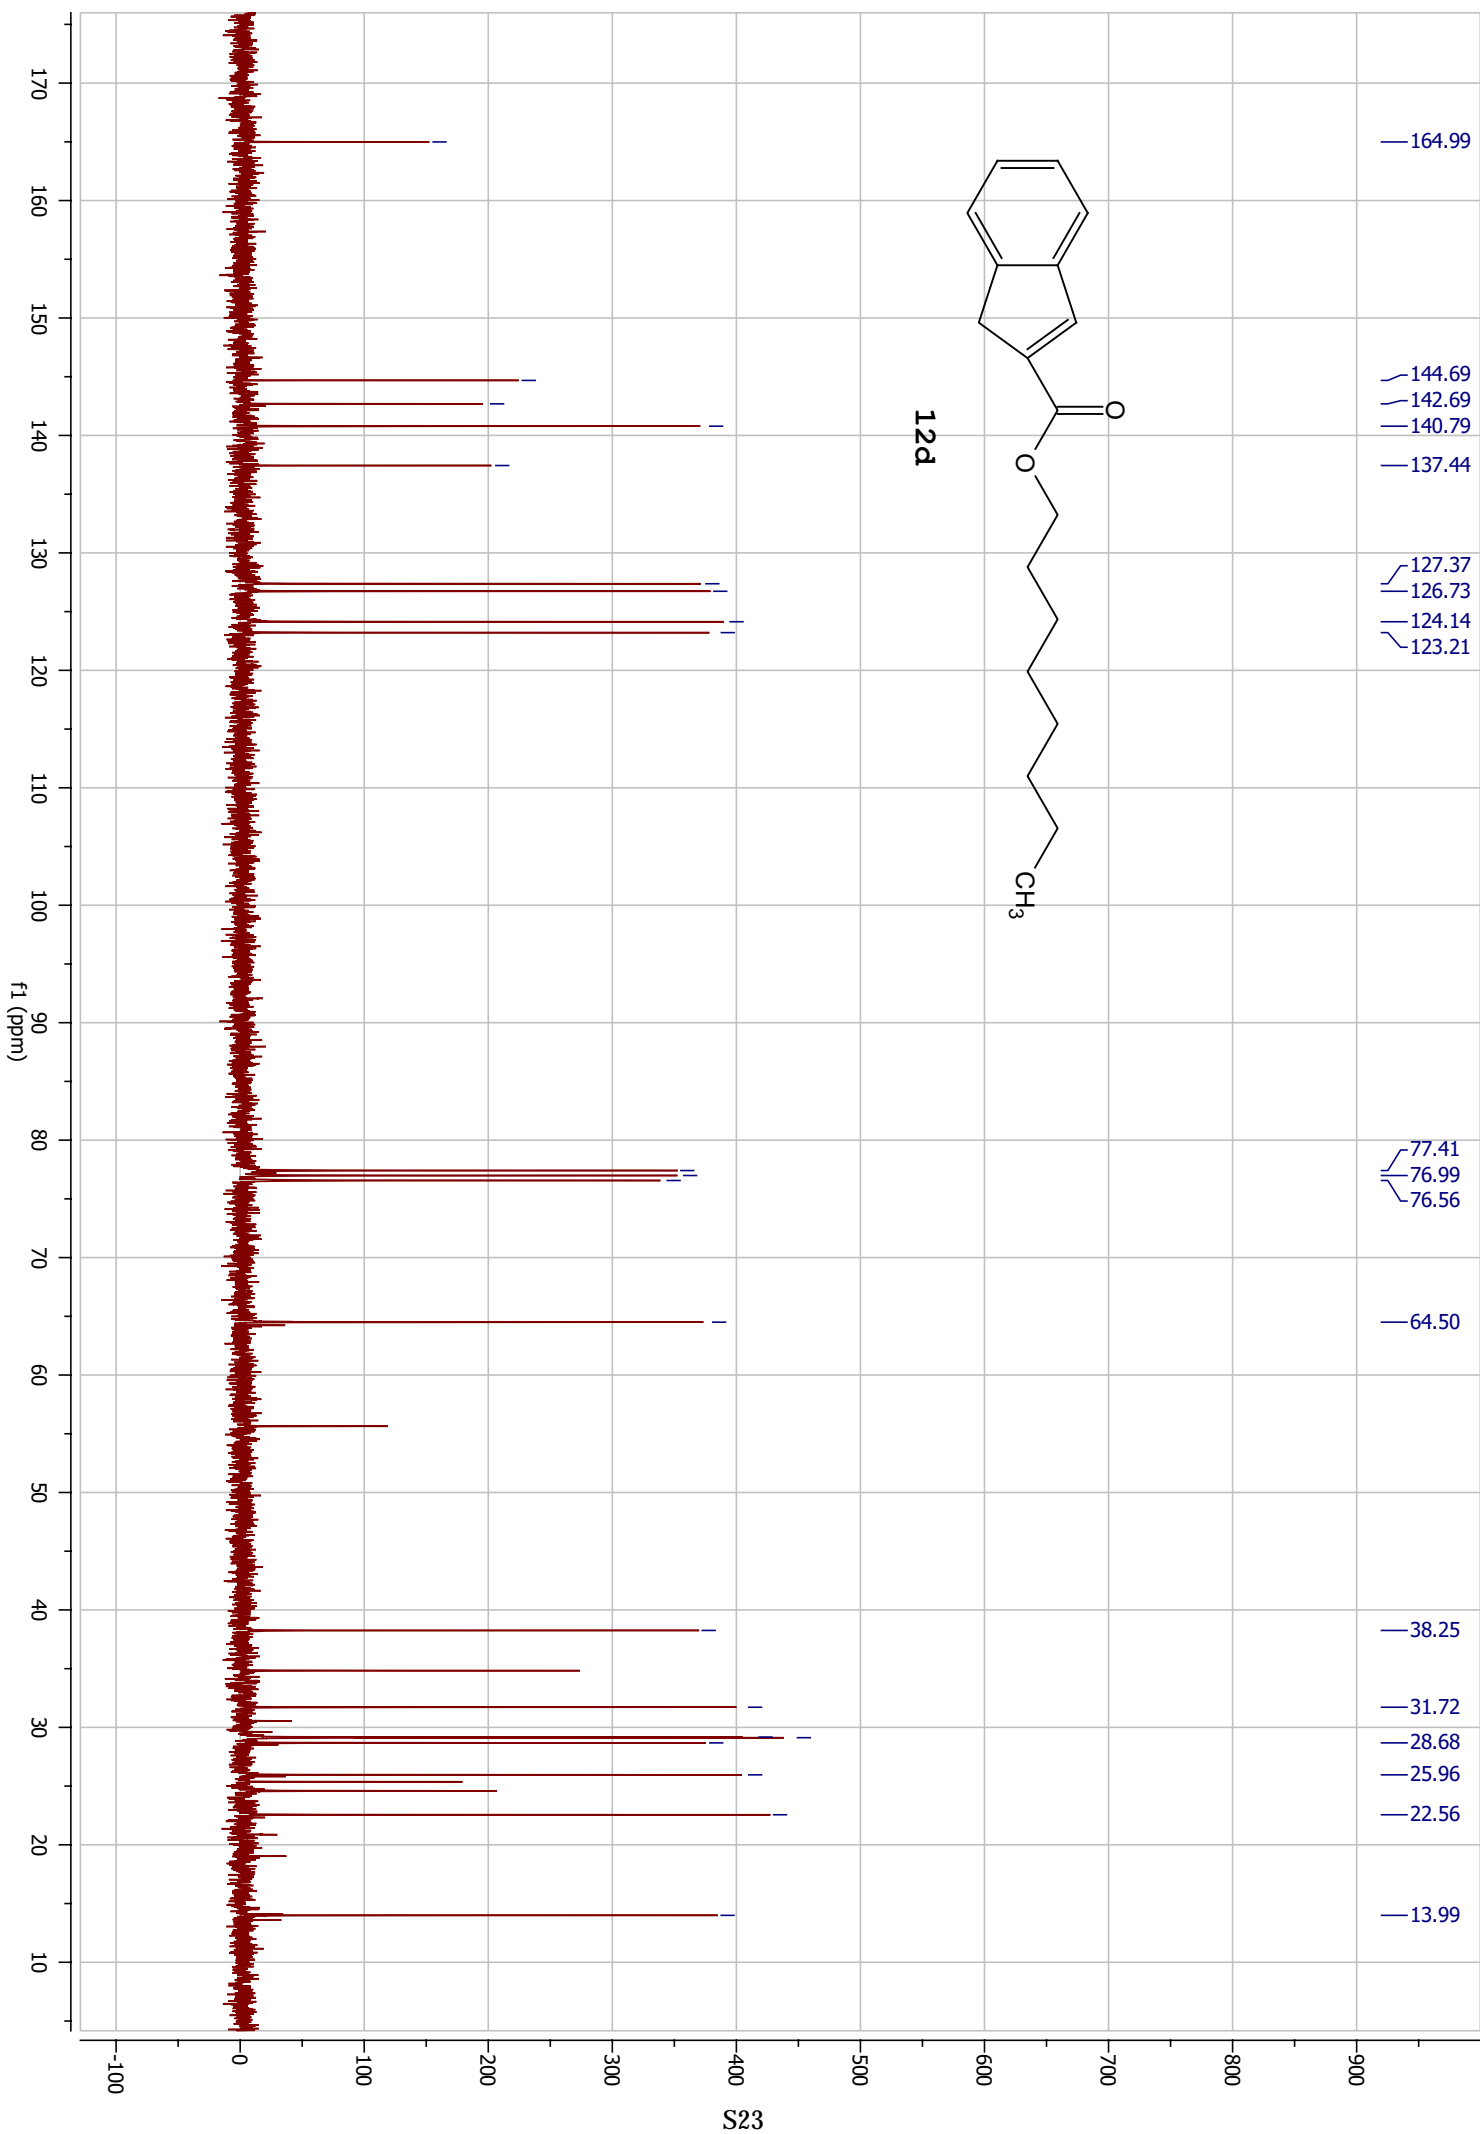

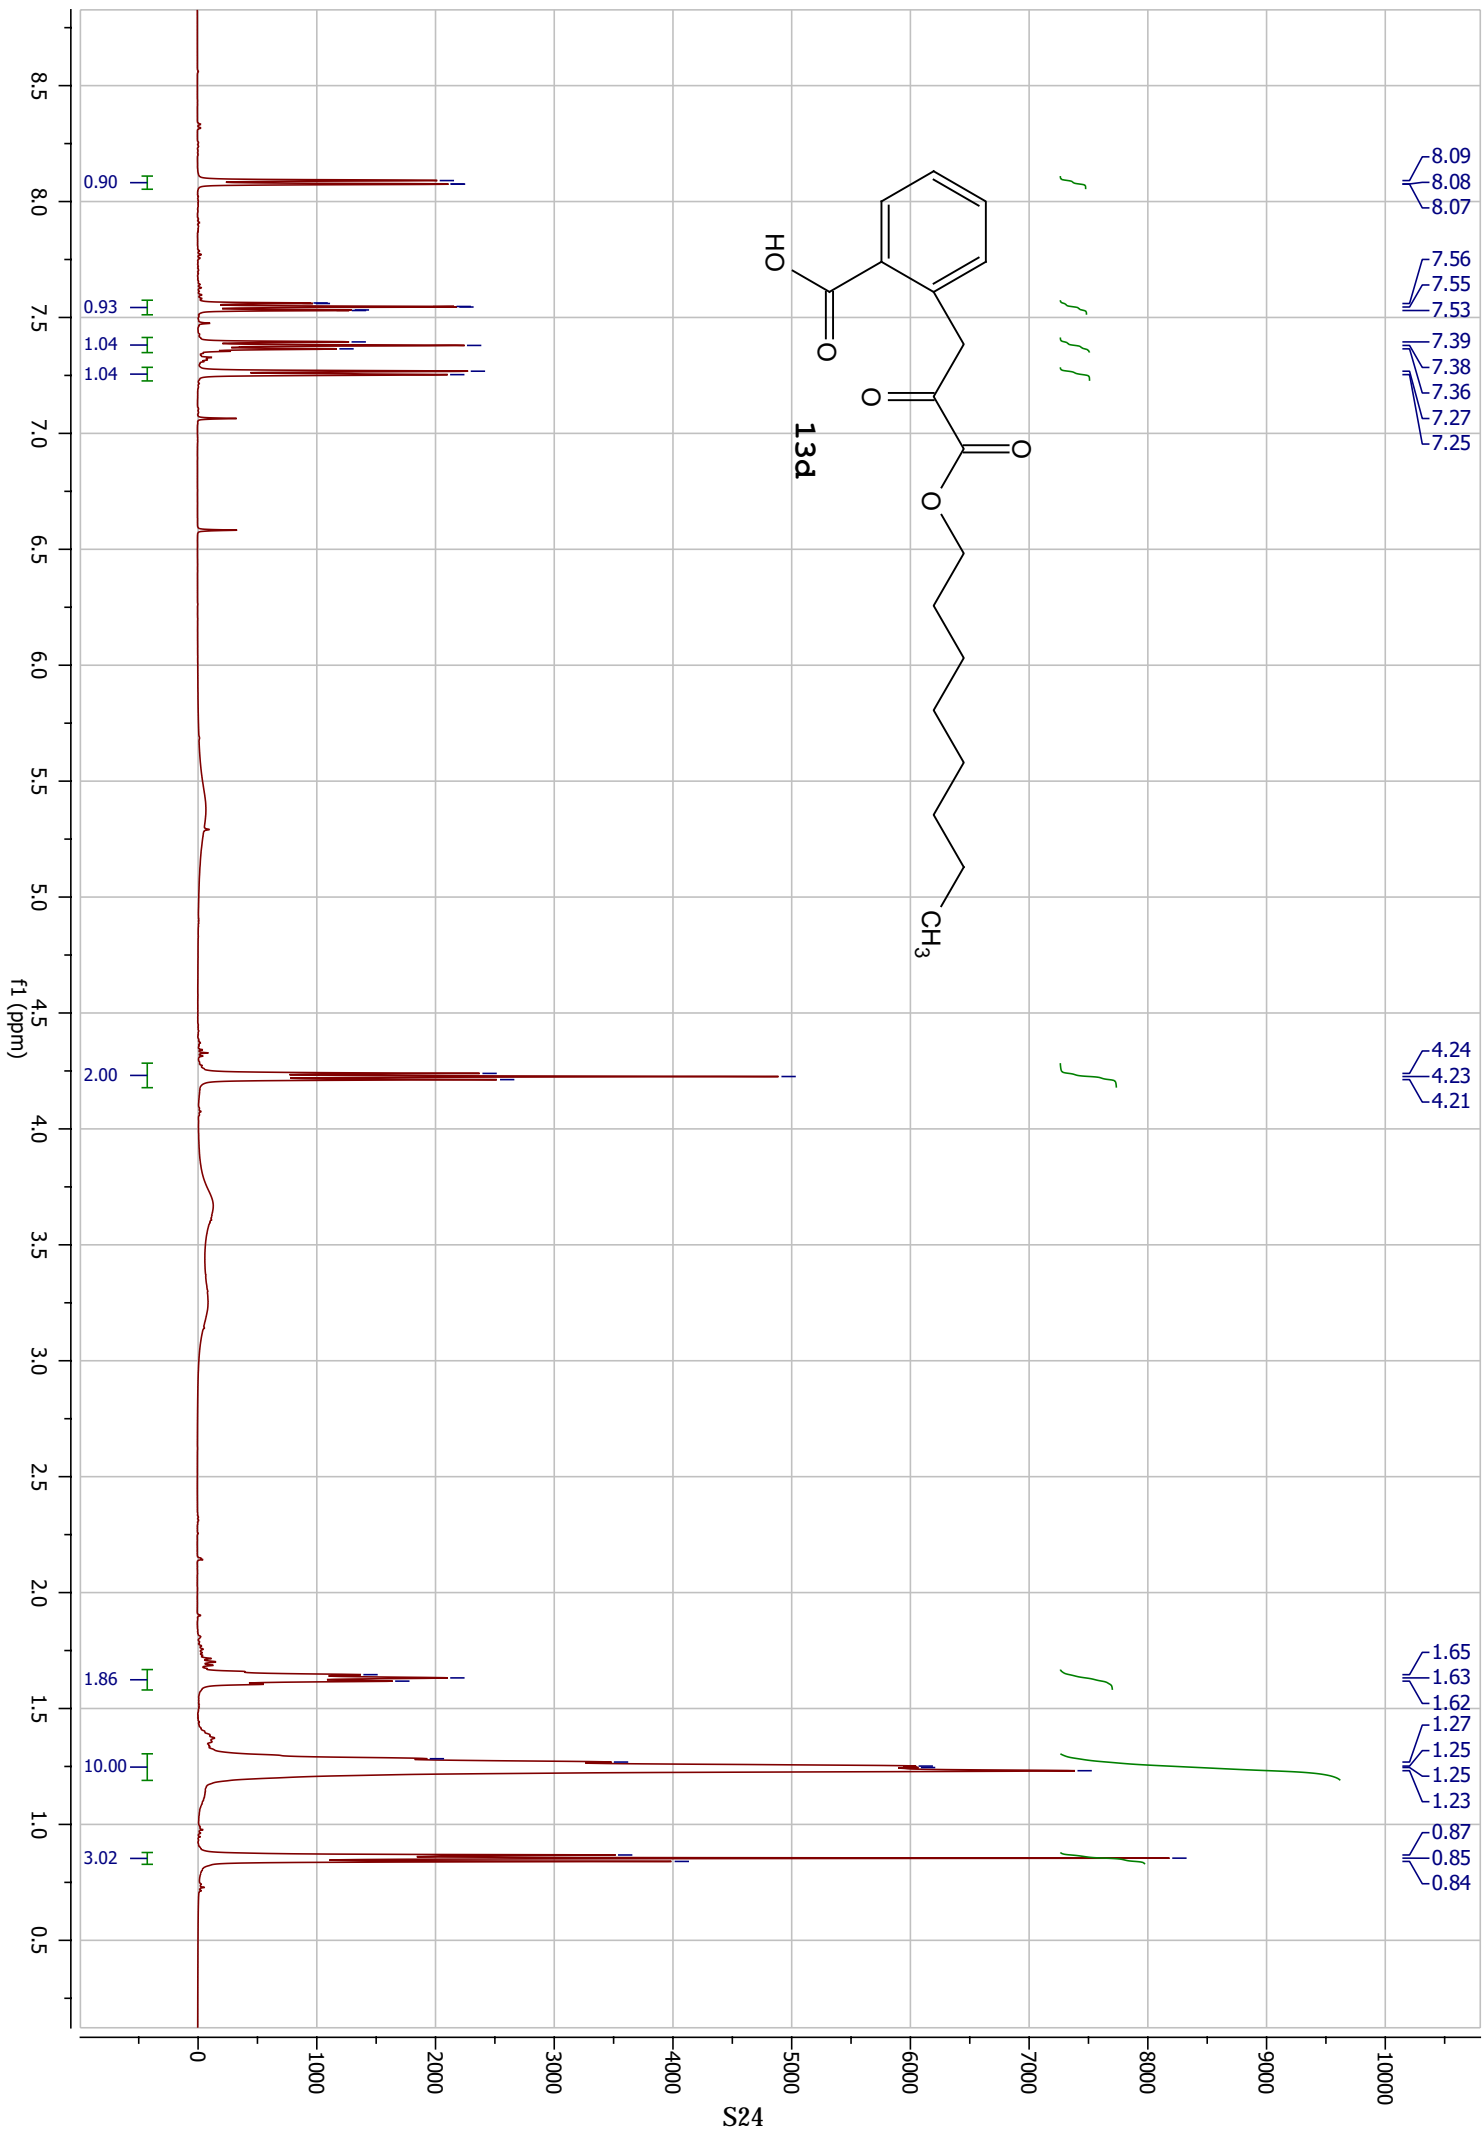



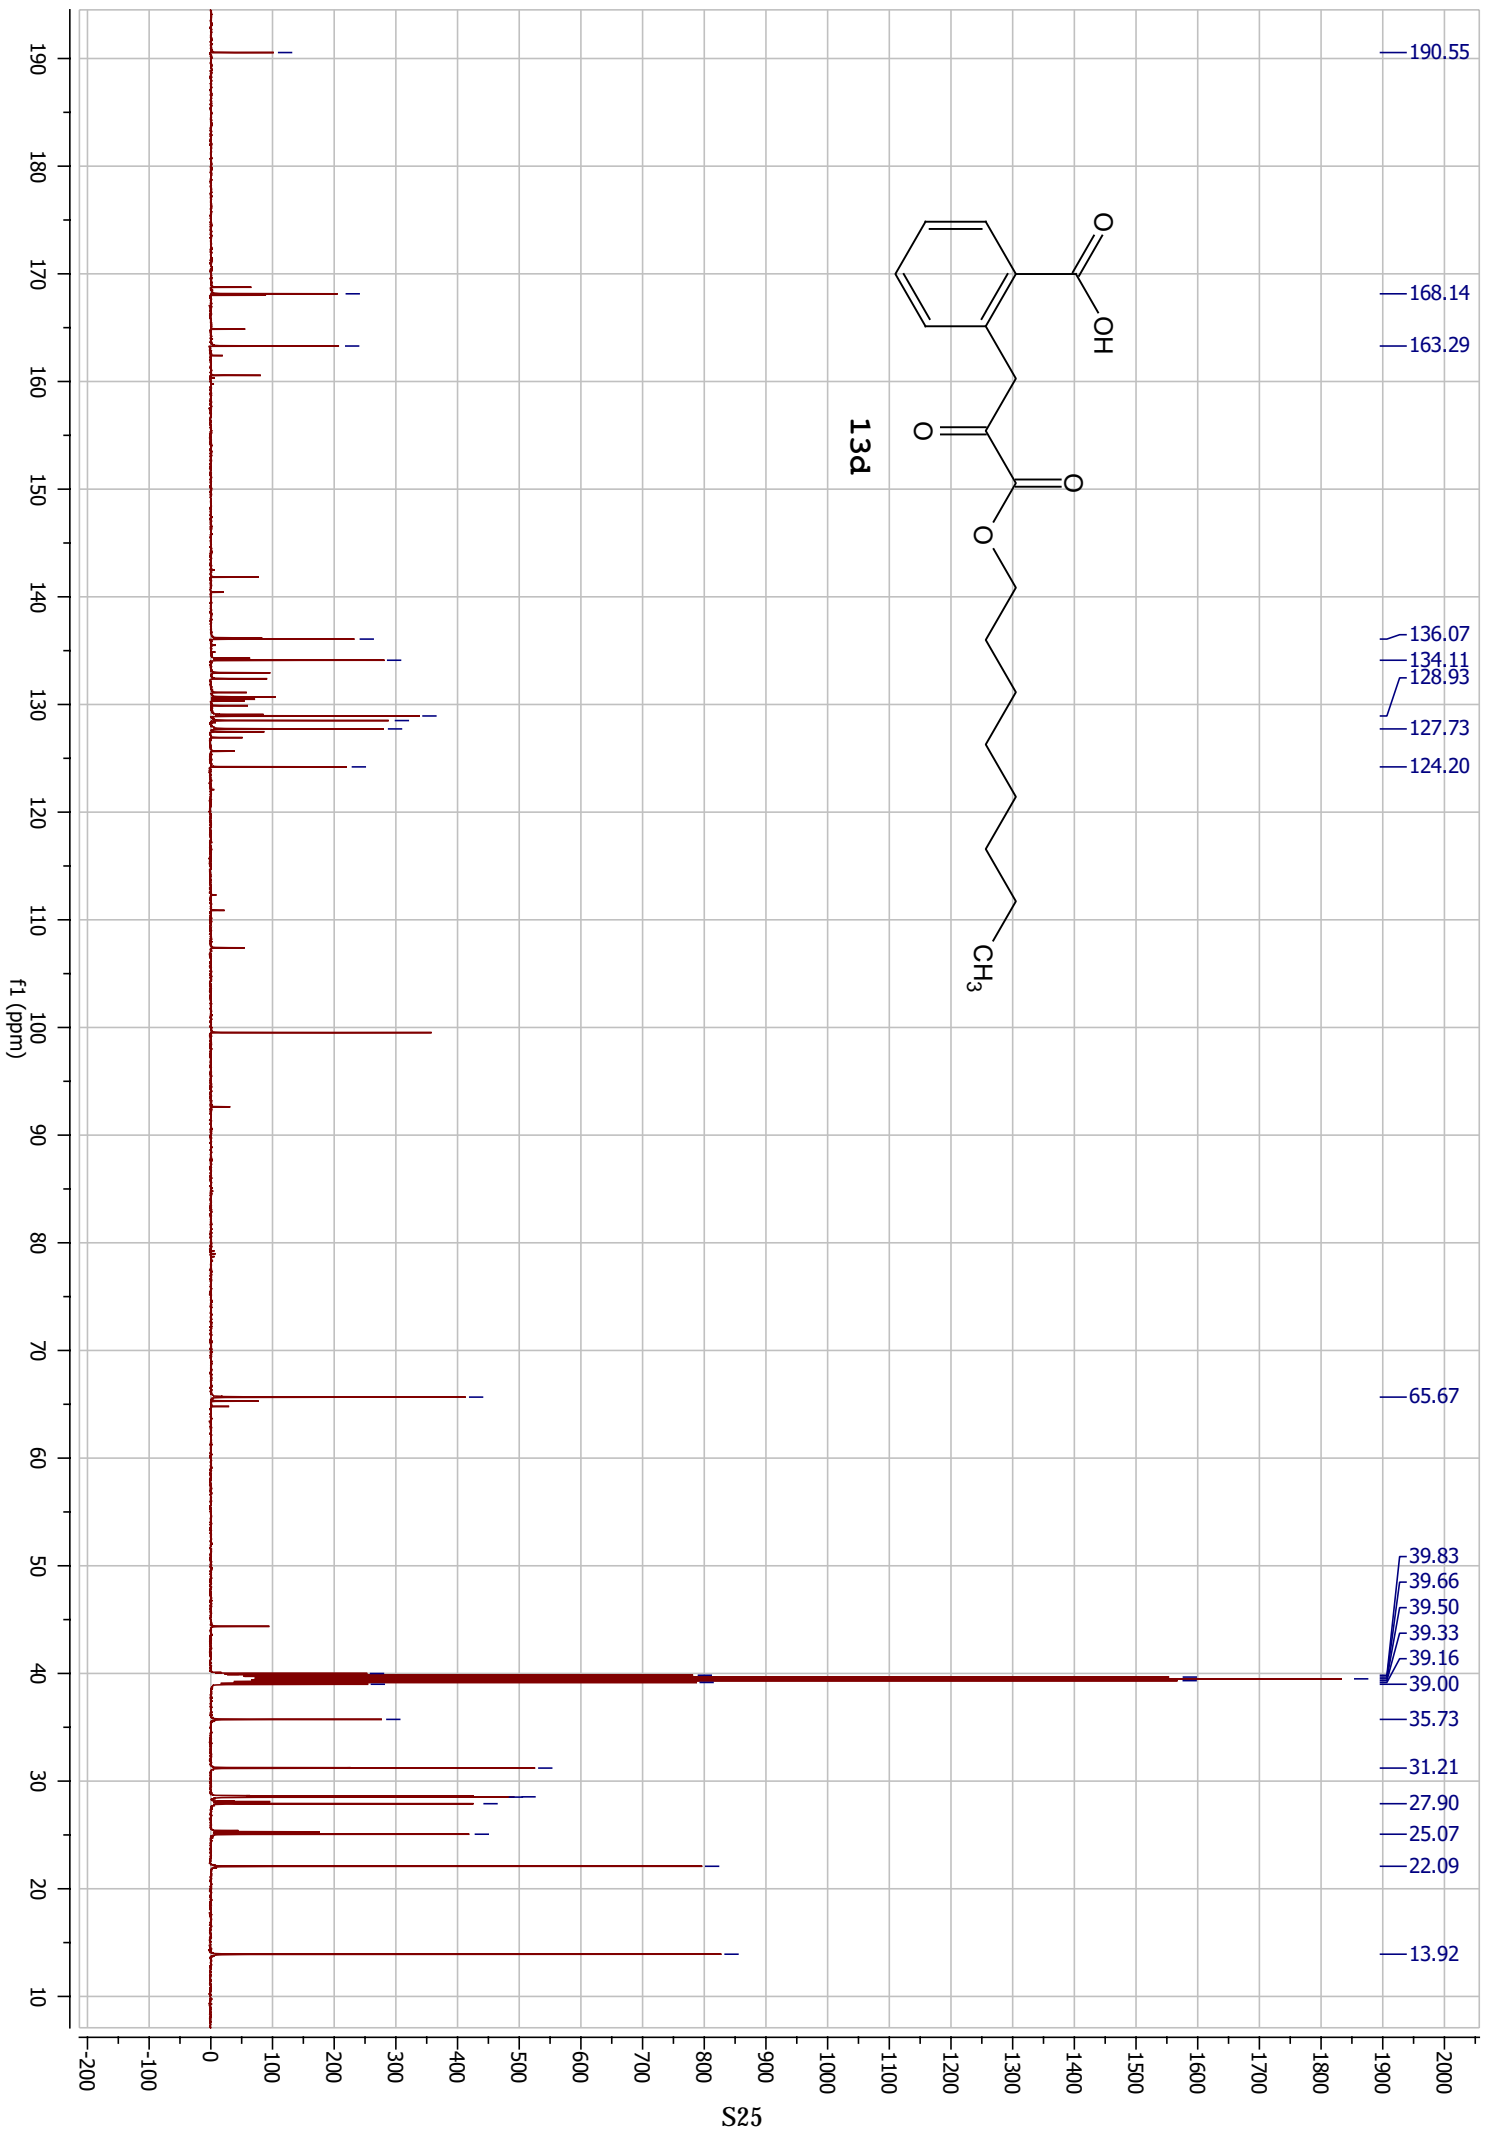

## References and Notes

- (1) All of the  $\alpha$ -ketoalkanedioic acids exist predominantly as the keto form except for two, namely: **13b**, which exists as a mixture of the predominant keto form and both *E* and *Z* enol forms (one major and one minor, unassigned); and **13d**, which exists as a mixture of all three forms, the keto and both enol forms.
- (2) Pietruszka, J.; Simon, R. C.; Kruska, F.; Braun, M. *Eur. J. Org. Chem.* **2009**, 35, 6217.
- (3) Varnavas, A.; Lassiani, L.; Valenta, V.; Berti, F.; Tontini, A.; Mennuni, L.; Makovec, F. *Eur. J. Med. Chem.* **2004**, 39, 85.
